# Supplementary material for: Associations between anthropometric indicators and both refraction and ocular biometrics in a cross-sectional study of Chinese schoolchildren
Source: PubMed Central journal article supplement — BMJ Open. 2019 May 10;9(5):e027212. doi: 10.1136/bmjopen-2018-027212 (PMC6530363; doi:10.1136/bmjopen-2018-027212), 2019-05-10
Supplement: bmjopen-2018-027212.draft_revisions.pdf [file bmjopen-2018-027212.draft_revisions.pdf]

# BMJ Open

BMJ Open is committed to open peer review. As part of this commitment we make the peer review history of every article we publish publicly available.

When an article is published we post the peer reviewers' comments and the authors' responses online. We also post the versions of the paper that were used during peer review. These are the versions that the peer review comments apply to.

The versions of the paper that follow are the versions that were submitted during the peer review process. They are not the versions of record or the final published versions. They should not be cited or distributed as the published version of this manuscript.

BMJ Open is an open access journal and the full, final, typeset and author-corrected version of record of the manuscript is available on our site with no access controls, subscription charges or pay-per-view fees (<http://bmjopen.bmj.com>).

If you have any questions on BMJ Open's open peer review process please email [info.bmjopen@bmj.com](mailto:info.bmjopen@bmj.com)

# BMJ Open

## Associations between anthropometric indicators and refraction and ocular biometrics in a cross-sectional study of Chinese schoolchildren

|                               |                                                                                                                                                                                                                                                                                                                                                                                                                 |
|-------------------------------|-----------------------------------------------------------------------------------------------------------------------------------------------------------------------------------------------------------------------------------------------------------------------------------------------------------------------------------------------------------------------------------------------------------------|
| Journal:                      | <i>BMJ Open</i>                                                                                                                                                                                                                                                                                                                                                                                                 |
| Manuscript ID                 | bmjopen-2018-027212                                                                                                                                                                                                                                                                                                                                                                                             |
| Article Type:                 | Research                                                                                                                                                                                                                                                                                                                                                                                                        |
| Date Submitted by the Author: | 11-Oct-2018                                                                                                                                                                                                                                                                                                                                                                                                     |
| Complete List of Authors:     | Ye, Sheng; School of Public Health, Tianjin Medical University<br>Liu, Shengxin; School of Public Health, Tianjin Medical University<br>Li, Wenlei; School of Public Health, Tianjin Medical University<br>Wang, Qifan; School of Public Health, Tianjin Medical University<br>Xi, Wei; School of Public Health, Tianjin Medical University<br>Zhang , Xin; School of Public Health, Tianjin Medical University |
| Keywords:                     | PUBLIC HEALTH, EPIDEMIOLOGY, Paediatric ophthalmology < OPTHALMOLOGY                                                                                                                                                                                                                                                                                                                                            |
|                               |                                                                                                                                                                                                                                                                                                                                                                                                                 |

SCHOLARONE™  
Manuscripts

1  
2  
3  
4 1 **Associations between anthropometric indicators and refraction and**  
5  
6  
7 2 **ocular biometrics in a cross-sectional study of Chinese schoolchildren**  
8  
9  
10 3

11  
12 4 **Sheng Ye, Shengxin Liu, Wenlei Li, Qifan Wang, Wei Xi, and Xin Zhang**  
13

14  
15 5 Department of Maternal, Child and Adolescent Health, School of Public Health, Tianjin  
16  
17 6 Medical University, Tianjin, China.  
18

19  
20 7 SY and SL contributed equally to the work presented here and should therefore be regarded  
21  
22  
23 8 as equivalent authors.  
24  
25

26 9  
27  
28 10 **Correspondence to**

29  
30  
31 11 Prof. Xin Zhang, Department of Maternal, Child and Adolescent Health, School of Public  
32  
33 12 Health, Tianjin Medical University, No. 22 Qixiangtai Road, Tianjin 300070, China;  
34  
35  
36 13 zhangxin@tmu.edu.cn.  
37  
38

39 14  
40  
41  
42 15 **Synopsis**  
43

44  
45 16 Development of refraction may be related to physical development during early adolescent  
46  
47 17 growth. Future studies in endocrine traits, such as the sex hormones, could further provide  
48  
49  
50 18 new insights for the association between height and refraction.  
51  
52

53 19  
54  
55  
56 20

1  
2  
3  
4 215  
6  
7 **22 ABSTRACT**8  
9 **23 Objective** To identify associations between anthropometric indicators, including height,  
10  
11  
12  
13  
14  
15  
16  
17  
18  
19  
20  
21  
22  
23  
24 weight, and body mass index (BMI), and refraction and ocular biometrics in Chinese  
25  
26  
27 schoolchildren in Tianjin, China.28  
29  
30  
31  
32  
33  
34  
35  
36  
37  
38  
39  
40  
41  
42  
43  
44  
45  
46  
47  
48  
49  
50  
51  
52  
53  
54  
55  
56  
57  
58  
59  
60  
**26 Design** Cross-sectional study.**27 Participants** A total of 482 (86.1%) students (6 to 15 years old) were enrolled using a  
28  
29  
30  
31  
32  
33  
34  
35  
36  
37  
38  
39  
40  
41  
42  
43  
44  
45  
46  
47  
48  
49  
50  
51  
52  
53  
54  
55  
56  
57  
58  
59  
60  
stratified, clustered, random sampling method in this study, with no recorded history of eye  
or systemic pathologies.**30 Methodology** Height and weight were measured using standardized protocols. Ocular  
31  
32  
33  
34  
35  
36  
37  
38  
39  
40  
41  
42  
43  
44  
45  
46  
47  
48  
49  
50  
51  
52  
53  
54  
55  
56  
57  
58  
59  
60  
biometrics, such as axial length (AL), vitreous chamber depth (VCD), and corneal  
curvature (CC), were measured by a low-coherence optical reflectometry device. The  
AL/CC ratio was calculated. Cycloplegic refraction was measured using autorefraction.**34 Results** The overall prevalence of myopia was 71.16%. The mean refraction, height,  
35  
36  
37  
38  
39  
40  
41  
42  
43  
44  
45  
46  
47  
48  
49  
50  
51  
52  
53  
54  
55  
56  
57  
58  
59  
60  
weight and BMI were  $-1.48 \pm 1.82$  D,  $140.79 \pm 13.95$  cm,  $38.29 \pm 10.86$  kg, and  $19.04 \pm$   
 $3.18$  kg/m<sup>2</sup>, respectively. Taller persons tended to have eyes with longer ALs ( $+0.14$  mm  
for each 10 cm difference in height,  $P<0.05$ ), deeper VCDs ( $+0.13$  mm,  $P<0.05$ ), higher  
AL/CC ratios ( $+0.02$ ,  $P<0.05$ ), and more negative refractions ( $-0.21$  D,  $P<0.05$ ) after  
controlling for age, gender, parental myopia, family income, reading and writing distance,  
and time spent outdoors. However, although weight was correlated with AL, central

1  
2  
3  
4 41 corneal thickness and VCD, students with different weights or BMIs showed similar  
5  
6  
7 42 refraction.

8  
9 43 **Conclusions** Height remained independently related to refraction and various ocular  
10  
11  
12 44 biometrics after adequately controlling covariates, which could support the idea that the  
13  
14  
15 45 development of refraction is related to physical development. Future work should focus on  
16  
17  
18 46 the effects of sex hormones on the association between height and refraction during early  
19  
20  
21 47 adolescent growth.

22  
23 48 **Keywords:** anthropometric indicators, refraction, ocular biometrics, schoolchildren  
24  
25

26 49

27  
28 50 **Strengths and limitations of this study**

- 29  
30  
31 51 ● A stratified, clustered, random sampling strategy was applied to recruit participants,  
32  
33  
34 52 which could avoid the potential selection bias present in previous studies performed in  
35  
36  
37 53 specific population groups.
- 38  
39 54 ● Ocular biometrics were measured comprehensively and the covariates were controlled  
40  
41  
42 55 adequately, which allowed us to achieve a more detailed analysis.
- 43  
44  
45 56 ● This study was cross-sectional design and could not allow an evaluation of causality.
- 46  
47  
48 57 ● Puberty parameters were not available in our study, limiting the further research to  
49  
50  
51 58 explore the potential shared mechanism underlies both physical development during  
52  
53  
54 59 early adolescent growth and refractive status.

55  
56 60

## 61 **Introduction**

62 Myopia has reached almost epidemic proportions in the world, especially in certain areas  
63 of East and Southeast Asia.<sup>1</sup> This condition is commonly viewed as etiologically  
64 heterogeneous. Genetic and environmental risk factors have been shown to be involved in  
65 its progression. The genetic basis of myopia has been supported by evidence indicating  
66 high heritability values in twin studies<sup>2</sup> and a higher prevalence of myopia in children with  
67 myopic parents.<sup>3</sup> Excessive near work activities,<sup>4 5</sup> limited time spent outdoors,<sup>6 7</sup> and  
68 intensive educational pressure<sup>8 9</sup> all have been reported to promote the development of  
69 myopia. In our effort to consider other factors, we noted that anthropometric indicators,  
70 such as height, are thought to be associated with refraction, although no consensus has been  
71 achieved regarding this issue.<sup>10 11</sup>

72 Refractive status is determined by the balance of refractive power of the cornea and lens,  
73 and the axial length (AL) of the eye (representing the combination of anterior chamber  
74 depth (ACD), lens thickness (LT), and vitreous chamber depth (VCD)).<sup>12</sup> Myopia usually  
75 arises in an eye that has become too long, particularly via the elongation of the vitreous  
76 chamber. Several epidemiological studies have demonstrated that the changes in ocular  
77 dimensions that occur in early life progress concomitant with physical development in  
78 children,<sup>13 14</sup> and the ages of cessation are also similar for increases in height and axial  
79 elongation.<sup>13</sup> Furthermore, genetic studies have confirmed that a common genetic pathway  
80 underlies both height and AL,<sup>15 16</sup> although no specific genetic variants have yet been

1  
2  
3  
4 81 identified. All of these clues suggest the existence of a shared mechanism that regulates  
5  
6  
7 82 the coordinated growth of body and eye size. It has been suggested that there may be a  
8  
9  
10 83 relationship between body stature and refraction. However, in contrast to the consensus  
11  
12 84 regarding the significant associations between body stature and AL, the relationship  
13  
14  
15 85 between body stature and refraction remains controversial. Whereas many studies have  
16  
17 86 reported that taller<sup>10 17-20</sup> and heavier persons<sup>21 22</sup> have an increased likelihood of having  
18  
19  
20 87 myopia, other studies have found no such association.<sup>23-28</sup> The discrepancies among these  
21  
22  
23 88 findings may be due to differences in sample sizes, concept definitions or other  
24  
25  
26 89 methodological variations (e.g., height and weight obtained via self-reporting).

27  
28 90 In China, few studies have comprehensively measured ocular biometrics or further  
29  
30  
31 91 explored their associations with body stature. Wang et al.<sup>14</sup> confirmed that there is a  
32  
33  
34 92 positive association between height and AL in 7- to 15-year-old schoolchildren based on  
35  
36  
37 93 longitudinal data obtained in Guangzhou, China. However, detailed information about the  
38  
39  
40 94 associations between body stature and refraction and other ocular biometrics was not  
41  
42  
43 95 available in that study. Additionally, myopia most commonly starts in young  
44  
45  
46 96 schoolchildren and progresses in early adolescence.<sup>21</sup> It is most appropriate to study the  
47  
48  
49 97 effect of body growth on refractive development in young, growing students. Therefore, in  
50  
51  
52 98 the current survey, we explored the associations between anthropometric indicators,  
53  
54  
55 99 including height, weight, and body mass index (BMI), and both refraction and ocular  
56  
57 100 biometrics in schoolchildren aged 6 to 15 years old in Tianjin, China.

1  
2  
3  
4 1015  
6  
7 102 **METHODS**8  
9 103 Participants were initially recruited using a stratified, clustered, random sampling method.10  
11  
12 104 Two districts were randomly chosen from the 6 main urban districts in Tianjin in November13  
14  
15 105 2016. Next, one school was randomly selected from each selected district. One class was16  
17  
18 106 then randomly chosen from each grade level within the two selected schools. All students19  
20  
21 107 in these selected classes were invited, but participation in this study was voluntary. After22  
23  
24 108 the purposes and procedures of the study were explained to each student and their parents25  
26  
27 109 in depth, written informed consent was collected. Students without parental consent and28  
29  
30 110 students who had amblyopia, heterotropia, or any eye or systemic pathologies were31  
32  
33 111 excluded. Finally, the study consisted of 482 (86.1% response rate) 6- to 15-year-old34  
35  
36 112 students (264 boys, 218 girls) out of a total of 560 students who were initially invited.37  
38  
39 113 Individuals who were included in the study were older ( $9.42 \pm 2.09$  vs  $7.60 \pm 2.38$  years40  
41  
42 114 old,  $P < 0.01$ ) than those who were excluded (data not shown). There were no significant43  
44  
45 115 differences in gender, parental myopia, monthly family income, reading and writing46  
47  
48 116 distance, and time spent outdoors between the included and excluded individuals.49  
50  
51 117 The study protocol was approved by the Ethics Committee of Tianjin Medical University52  
53  
54 118 and performed in accordance with the tenets of the Declaration of Helsinki.55  
56  
57 119 **Ocular examinations**58  
59  
60 120 All included participants underwent a comprehensive eye examination, including



1  
2  
3  
4 121 measurements of intraocular pressure, a slit-lamp examination of the anterior and posterior  
5  
6 122 segments, cycloplegic autorefractometry and ocular biometrics. The purpose of intraocular  
7  
8  
9 123 pressure measurement and the slit lamp examination was to exclude contraindications for  
10  
11  
12 124 mydriasis.

13  
14  
15 125 Ocular biometrics, such as AL, central corneal thickness (CCT), ACD, LT, VCD, and  
16  
17 126 corneal curvature (CC), were measured with a low-coherence optical reflectometry device  
18  
19  
20 127 (Lenstar LS900; Haag-Streit AG, 3098 Koeniz, Switzerland) in both eyes before pupil  
21  
22  
23 128 dilation. The AL/CC ratio, also commonly known as the axial length/corneal radius  
24  
25  
26 129 (AL/CR) ratio, was additionally calculated. Cycloplegia was then induced by administering  
27  
28  
29 130 two drops containing 0.5% tropicamide and 0.5% phenylephrine in a mixed eye agent to  
30  
31  
32 131 each eye at 0 and 5 minutes. At 25 minutes after the second instillation, participants with  
33  
34  
35 132 full cycloplegia underwent autorefractometry using an auto-kerato-refractor (Canon  
36  
37 133 Autorefractor RK-F1, Tokyo, Japan), and 3 consecutive measurements were taken in both  
38  
39  
40 134 eyes. The mean value of 3 valid measurements was calculated for statistical analysis. All  
41  
42  
43 135 of the above instruments were calibrated before the ocular examination.

44  
45 136 The spherical equivalent refraction (SER) of each eye was then calculated as the  
46  
47  
48 137 spherical refraction + 1/2 of the cylindrical refraction using data obtained using the  
49  
50  
51 138 autorefractor. Myopia was defined as an SER of  $\leq -0.5$  diopters (D).

### 52 53 139 **Anthropometric measurements**

54  
55  
56 140 Height and weight were obtained following specific standardized protocols. Height was

1  
2  
3  
4 141 determined with the subject standing barefoot on the floor of the height meter and recorded  
5  
6  
7 142 in centimeters (cm). Weight was measured without shoes and heavy coats on a calibrated  
8  
9  
10 143 electronic weighing scale and recorded in kilograms (kg). BMI was derived as  
11  
12 144 weight/height<sup>2</sup> and recorded in kilograms per square meter (kg/m<sup>2</sup>).

### 145 **Questionnaire**

146 The parents of participants were asked to complete a questionnaire developed to collect  
147 information on social-demographic characteristics and potential risk factors for school  
148 myopia. Moreover, parents whose children were excluded from the study were also  
149 required to finish the same questionnaire.

150 The basic characteristics of the participants included age (calculated as the date of  
151 investigation minus the birth date of the child), gender (boy or girl), the monthly income  
152 of the family (less than 4000 RMB, 4000-8000 RMB, 8000-10,000 RMB, 10,000-15,000  
153 RMB, or more than 15,000 RMB), and the number of myopic parents (none, one parent,  
154 or both parents). Near work related behaviors were ascertained with the question “What is  
155 the distance between your child's eyes and a book when reading or writing?”, with answers  
156 categorized as follows: <10 cm, 10-19 cm, 20-29 cm, and ≥30 cm. Time spent outdoors  
157 was estimated by asking how many hours per day the child spent in outdoor activities  
158 during weekdays and weekends separately. The average time spent outdoors was calculated  
159 by the following formula:  $[T_{\text{weekday}} (\text{hours spent on weekday}) \times 5 + T_{\text{weekend}} (\text{hours spent on}$   
160  $\text{weekend}) \times 2] \div 7$ .

1  
2  
3  
4 **161 Statistical analysis**  
5

6  
7 162 Because refraction and ocular biometrics were highly correlated between the left and right  
8  
9 163 eyes (the Pearson correlation coefficients ( $r$ ) for refraction and AL were 0.90,  $P<0.01$ , and  
10  
11  
12 164 0.96,  $P<0.01$ , respectively), the data obtained from the right eye were chosen for analyses.

13  
14  
15 165 Ocular biometrics were all normally distributed, as determined by P-P plots.  
16

17 166 T-tests were performed for quantitative variables and chi-square tests were performed  
18  
19  
20 167 for categorical variables to analyze the differences in basic characteristics between persons  
21  
22  
23 168 with and without myopia. Univariate associations between anthropometric indicators and  
24  
25  
26 169 refraction and ocular biometrics were identified. Simple linear regression models were  
27  
28  
29 170 constructed to assess the effects of height, weight, and BMI (as independent variables) on  
30  
31  
32 171 refraction and individual ocular biometrics (as dependent variables). Tests for linear trends  
33  
34  
35 172 were performed by entering the median value of each category of the anthropometric  
36  
37  
38 173 indicator based on quartiles as a continuous variable into the models. Multiple linear  
39  
40  
41 174 regression models were then fitted after adjusting, in turn, for age, gender, parental myopia,  
42  
43  
44 175 family income, reading and writing distance, and time spent outdoors. Collinearity  
45  
46  
47 176 diagnostics and a residual analysis were performed for all multiple linear regression models.  
48  
49  
50 177 We found that multicollinearity was absent among the independent variables used in each  
51  
52  
53 178 model, and the points in each residual plot were nearly homogeneously distributed on the  
54  
55  
56 179 two sides of the zero horizontal line, suggesting that these fitted models were appropriate.

57 180 Statistical analyses were performed using commercial statistical software (SPSS for  
58  
59  
60

1  
2  
3  
4 181 Windows, version 20.0; IBM-SPSS, Chicago, Illinois, USA), and  $P$  values  $<0.05$  were  
5  
6  
7 182 considered statistically significant.

### 8 9 183 **Patient and public involvement**

10  
11  
12 184 Patients and the public were not involved in developing the research questionnaire,  
13  
14  
15 185 outcome measures and overall design of this study protocol.

## 16 17 18 19 20 187 **RESULTS**

### 21 22 23 188 **Characteristics of participants**

24  
25  
26 189 Among the 482 included schoolchildren, the prevalence of myopia was 71.16% (343 of  
27  
28 190 482; 95% CI, 67.01% to 75.10%). The mean SER, height, weight and BMI of all  
29  
30  
31 191 participants was  $-1.48 \pm 1.82$  D,  $140.79 \pm 13.95$  cm,  $38.29 \pm 10.86$  kg, and  $19.04 \pm 3.18$   
32  
33  
34 192  $\text{kg/m}^2$ , respectively (Table 1). Participants with myopia were older ( $P<0.01$ ), taller  
35  
36 193 ( $P<0.01$ ), heavier ( $P<0.01$ ); were more likely to have myopic parents ( $P<0.01$ ), a higher  
37  
38  
39 194 monthly family income ( $P<0.05$ ), a closer reading and writing distance ( $P<0.05$ ), and to  
40  
41  
42 195 spent less time outdoors ( $P<0.05$ ); and had eyes with longer ALs ( $P<0.01$ ), deep ACDs  
43  
44  
45 196 and VCDs ( $P<0.01$ ), thinner LTs ( $P<0.01$ ), and larger AL/CC ratios ( $P<0.01$ ).

### 46 47 197 **Bivariate correlations between variables**

48  
49  
50 198 Height was positively correlated with AL ( $r= 0.50$ ,  $P<0.01$ ), CCT ( $r= 0.17$ ,  $P<0.01$ ), ACD  
51  
52  
53 199 ( $r= 0.29$ ,  $P<0.01$ ), VCD ( $r= 0.49$ ,  $P<0.01$ ) and the AL/CC ratio ( $r= 0.49$ ,  $P<0.01$ ) and  
54  
55  
56 200 negatively correlated with SER ( $r= -0.45$ ,  $P<0.01$ ) and LT ( $r= -0.24$ ,  $P<0.01$ ), although

1  
2  
3  
4 201 these correlations were of low to moderate strength. However, there was no correlation  
5  
6  
7 202 between height and CC (Table 2). The correlation analysis of weight with refraction and  
8  
9  
10 203 individual ocular biometrics also produced similar results except that there was a positive  
11  
12 204 correlation between weight and CC. BMI was positively correlated with AL, CCT, VCD  
13  
14  
15 205 and the AL/CC ratio and negatively correlated with SER but was not correlated with ACD,  
16  
17 206 LT or CC.

### 207 **Linear trends in refraction and ocular biometrics changes by quartiles of body stature**

208 Taller and heavier persons tended to have eyes with longer ALs ( $P$  for trend,  $<0.01$ ), thicker  
209 CCTs ( $P$  for trend,  $<0.05$ ), deeper ACDs ( $P$  for trend,  $<0.01$ ), thinner LTs ( $P$  for trend,  
210  $<0.01$ ), deeper VCDs ( $P$  for trend,  $<0.01$ ), higher AL/CC ratios ( $P$  for trend,  $<0.01$ ), and  
211 more myopic refractions ( $P$  for trend,  $<0.01$ ) (Table 3). In addition to ACD and LT, the  
212 above tendencies were also observed among more obese schoolchildren (students with  
213 higher BMIs).

### 214 **Linear regression analysis of the associations between anthropometric indicators and** 215 **refraction and ocular biometrics**

216 In model 1, we used the association between height and refraction as an example and found  
217 that for each 10 cm increase in height, the SER was expected to decrease by 0.59 D ( $P<0.01$ )  
218 without controlling for any covariates (Table 4). In the next two models, we controlled, in  
219 turn, for age and gender or for age, gender, parental myopia, family income, reading and  
220 writing distance and time spent outdoors, and found that the difference in SER declined by

1  
2  
3  
4 221 0.26 D ( $P<0.01$ ) and 0.21 D ( $P<0.05$ ) in each of these models, respectively. In general,  
5  
6  
7 222 taller persons tended to have eyes with longer ALs (+0.14 mm,  $P<0.05$ ), deeper VCDs  
8  
9 223 (+0.13 mm,  $P<0.05$ ), greater AL/CC ratios (+0.02,  $P<0.05$ ), and more negative refractions  
10  
11  
12 224 (-0.21 D,  $P<0.05$ ). However, after we controlled for the same confounders described above,  
13  
14  
15 225 height was no longer related to CCT, ACD, or LT.

16  
17 226 Although weight was correlated with AL, CCT, and VCD in model 3, it was not  
18  
19  
20 227 associated with ACD, LT, the AL/CC ratio or refraction. For each 10 kg increase in weight,  
21  
22  
23 228 AL was 0.15 mm longer ( $P<0.01$ ), CCT 4.44  $\mu\text{m}$  thicker ( $P<0.05$ ), and VCD 0.15 mm  
24  
25  
26 229 deeper ( $P<0.01$ ). Nonetheless, BMI was not correlated with refraction or any individual  
27  
28  
29 230 ocular biometric in multiple linear regression models.

30  
31 231

## 32 33 34 232 **DISCUSSION**

35  
36 233 In this paper, we comprehensively measured ocular biometrics and then explored the  
37  
38  
39 234 associations between anthropometric indicators and refraction and ocular biometrics after  
40  
41  
42 235 adequately controlling covariates. We were therefore able to achieve a more detailed  
43  
44  
45 236 analysis than has been presented in previous studies. A stratified, clustered, random  
46  
47  
48 237 sampling strategy was applied to recruit participants, and this allowed us to avoid the  
49  
50  
51 238 potential selection bias present in previous studies performed in specific population groups,  
52  
53 239 such as male conscripts.<sup>27 29</sup>

54  
55  
56 240 The current results are in almost complete agreement with those of Saw et al.,<sup>17</sup> who

1  
2  
3  
4 241 showed that among 1449 Singaporean Chinese children aged 7-9 years old, taller persons  
5  
6  
7 242 were more likely to have eyes with longer ALs (+0.46 mm,  $P<0.01$ ), deeper VCDs (+0.46  
8  
9  
10 243 mm,  $P<0.01$ ), flatter corneas (+0.10 mm,  $P<0.01$ ), greater AL/CC ratios (+0.02,  $P=0.03$ ),  
11  
12 244 and refractions that tended toward myopia (-0.47 D,  $P<0.01$ ) after controlling for age,  
13  
14  
15 245 gender, parental myopia, and the number of books read per week. A birth cohort performed  
16  
17  
18 246 in Britain to examine the relationship between height growth trajectories and the  
19  
20  
21 247 development of myopia presented similar results.<sup>10</sup> For each SD increase in height during  
22  
23  
24 248 the period the children aged from 2.5 to 10 years old, SER had become more negative by -  
25  
26 249 0.075 D (95% CI, -0.112 to -0.039;  $P<0.01$ ) and -0.081 D (95% CI, -0.129 to -0.034;  
27  
28  
29 250  $P<0.01$ ) when the children reached 11 and 15 years old, respectively. However, Huang et  
30  
31 251 al.<sup>28</sup> reported that there was no statistically significant correlation between myopia shift  
32  
33  
34 252 and height changes among schoolchildren aged 7 to 9 years old in Taiwan, China.

35  
36 253 Although the association remains unclear, these results will help us to further explore  
37  
38  
39 254 the intricate relationship between the development of physical characteristics and  
40  
41  
42 255 refraction. A commonly proposed explanation for a potential association is that both higher  
43  
44  
45 256 height and myopia are independent consequences of better socioeconomic status, and there  
46  
47  
48 257 may therefore be no causal relationship between height and myopia.<sup>17 23</sup> However, in this  
49  
50  
51 258 study, after we controlled for socioeconomic characteristics and myopia-related risk factors,  
52  
53  
54 259 height remained independently related to refraction and various ocular biometrics. Myopia  
55  
56 260 most commonly develops during the period extending from childhood to early adolescence

1  
2  
3  
4 261 (from approximately 8 to 14 years old),<sup>30</sup> and this is also the period during which growth  
5  
6  
7 262 spurts occur;<sup>31</sup> we therefore inferred that the development of refraction could be related to  
8  
9  
10 263 physical development during the early period of adolescent growth. The findings of the  
11  
12 264 Singapore Cohort Study of Risk Factors for Myopia (SCORM) support this hypothesis.<sup>19</sup>  
13  
14  
15 265 The SCORM reported that boys and girls who experienced earlier peak height velocity also  
16  
17 266 achieved earlier peak SER velocity (at a mean age of 10.1 vs 10.6 years old for boys,  
18  
19  
20 267  $P=0.01$ , and 10.0 vs 10.6 years old for girls,  $P=0.01$ ) and had an earlier age of onset of  
21  
22  
23 268 myopia (9.9 vs 10.4 years old for boys,  $P=0.03$ , and 9.7 vs 10.1 years old for girls,  $P=0.04$ ).  
24  
25  
26 269 This could be a consequence of the sex hormone surge that occurs during early adolescence,  
27  
28  
29 270 especially during growth spurts. Moreover, sex hormone receptors are present in multiple  
30  
31  
32 271 regions of the human eye, including the iris, lens, and retina, and these receptors have been  
33  
34  
35 272 found to play roles in the development of various ocular diseases.<sup>32</sup> Therefore, sex  
36  
37  
38 273 hormones may be a significant mediator of the association between height and refraction  
39  
40  
41 274 observed in our study. This hypothesis, if valid, suggests that the endocrine traits observed  
42  
43  
44 275 during childhood and adolescence could provide important clues for mechanistic studies  
45  
46  
47 276 aimed at exploring refractive development.

47 277 The relationships weight and BMI share with refraction are not as extensively studied as  
48  
49  
50 278 those with height, but also presented the inconclusive conclusions. Heavier and more obese  
51  
52  
53 279 Chinese children and adults in Singapore have been shown to have refractions that tend  
54  
55  
56 280 toward hyperopia.<sup>17 23</sup> Heavier adults in rural Myanmar were also reported to have more



1  
2  
3  
4 281 positive refractions.<sup>25</sup> However, a twin study performed in Australia found that compared  
5  
6  
7 282 to females in the lowest quartile weight group, those in the highest weight quartile had a  
8  
9 283 higher risk of myopia (OR: 1.79,  $P=0.01$ ).<sup>22</sup> Consistent with the results of a cross-sectional  
10  
11  
12 284 study performed in 19-year-old male conscripts in South Korea,<sup>27</sup> in our study, we found  
13  
14  
15 285 that weight and BMI had no effect on refraction. Inconsistencies in data regarding the  
16  
17  
18 286 relationships weight and height share with refraction (i.e., refractions were myopic only in  
19  
20  
21 287 taller children and not in heavier or more obese children) have been more difficult to  
22  
23  
24 288 explain. Some uncontrolled confounders, such as nutritional status, could lead to these  
25  
26  
27 289 differences. Nutritional status not only affects physical development but also influences  
28  
29  
30 290 the development of myopia.<sup>33 34</sup> Therefore, in the future, a comprehensive dietary survey  
31  
32  
33 291 will be needed to determine whether nutritional status itself has any effect on the  
34  
35  
36 292 correlation between physical development and refractive development.

37 293 This study has several limitations that warrant consideration. First, information on  
38  
39  
40 294 putative myopia risk factors obtained from our questionnaire (e.g., the distance between  
41  
42  
43 295 the child's eyes and a book when reading or writing) was subjectively estimated by the  
44  
45  
46 296 parents. Although this method has been widely applied in previous studies, it can lead to  
47  
48  
49 297 recall bias. Differences between non-respondents and respondents may also have resulted  
50  
51  
52 298 in non-respondent bias given that a difference in age was identified between the individuals  
53  
54  
55 299 who were included in and excluded from this study. Second, all of the data collected in this  
56  
57  
58 300 study were cross-sectional and did not allow an evaluation of causality. Therefore, it

1  
2  
3  
4 301 remains uncertain whether the conclusions drawn from this study are applicable to  
5  
6  
7 302 longitudinal relationships. Furthermore, we could not analyze data regarding puberty  
8  
9  
10 303 parameters, such as the onset of pubic hair and voice break in boys and breast development  
11  
12 304 and age at menarche in girls. A later age at menarche (older than 14 years old) has been  
13  
14  
15 305 found to be associated with a decreased risk of moderate and high myopia.<sup>35</sup> To determine  
16  
17 306 whether physical development during early adolescent growth affects refractive status,  
18  
19  
20 307 these puberty parameters must be considered in future studies.

21  
22  
23 308 In conclusion, we found that taller children tended to have eyes with longer ALs, deeper  
24  
25 309 VCDs, higher AL/CC ratios and more myopic refractions after controlling for age, gender,  
26  
27  
28 310 parental myopia, family income, reading and writing distance, and time spent outdoors.  
29  
30  
31 311 The results of this study support the idea that the development of refraction is related to  
32  
33 312 physical development during early adolescent growth. Further research is required to  
34  
35 313 determine whether sex hormones during growth spurts could affect the association  
36  
37  
38 314 between height and refraction.

39  
40  
41  
42 315

43  
44  
45 316 **Acknowledgments** The authors thank all families who participated in our study, Tianjin  
46  
47 317 Eye Hospital for their help with ocular examinations, and all team members in the  
48  
49  
50 318 Department of Maternal, Child and Adolescent Health at the School of Public Health of  
51  
52  
53 319 Tianjin Medical University.

54  
55 320 **Contributors** Design of the study: SL and XZ. Collection and management of the data:

1  
2  
3  
4 321 SY, SL, WL and QW. Analysis and interpretation of the data: SY. Review and approval of  
5  
6  
7 322 the manuscript: SY, SL, WL, QW, WX and XZ.

8  
9 323 **Funding** This study was supported by grants from the Key Scientific Project of Tianjin  
10  
11  
12 324 Science and Technology Commission of China (15ZCZDSY01050) and the National  
13  
14  
15 325 Natural Science Foundation of China (No. 81773459).

16  
17 326 **Competing interests** None declared.

18  
19  
20 327 **Patient consent** Obtained.

21  
22  
23 328 **Ethics approval** Ethics Committee of Tianjin Medical University, China.

24  
25  
26 329 **Provenance and peer review** Not commissioned; externally peer reviewed.

27  
28 330 **Data sharing statement** No additional data are available.

29  
30  
31 331

32  
33  
34 332 **REFERENCES**

35  
36 333 1. Morgan IG, French AN, Ashby RS, *et al.* The epidemics of myopia: Aetiology and  
37  
38  
39 334 prevention. *Prog Retin Eye Res* 2018;**62**:134-49.

40  
41  
42 335 2. Kim MH, Zhao D, Kim W, *et al.* Heritability of myopia and ocular biometrics in Koreans:  
43  
44  
45 336 the healthy twin study. *Investigative ophthalmology & visual science*  
46  
47 337 2013;**54**(5):3644-9.

48  
49  
50 338 3. Ma Y, Zou H, Lin S, *et al.* Cohort study with 4-year follow-up of myopia and refractive  
51  
52  
53 339 parameters in primary schoolchildren in Baoshan District, Shanghai. *Clin Exp*  
54  
55 340 *Ophthalmol* 2018.

- 1  
2  
3  
4 341 4. Huang HM, Chang DS, Wu PC. The Association between Near Work Activities and  
5  
6 342 Myopia in Children-A Systematic Review and Meta-Analysis. *PloS one*  
7  
8  
9 343 2015;**10**(10):e0140419.  
10  
11  
12 344 5. Wu LJ, Wang YX, You QS, *et al.* Risk Factors of Myopic Shift among Primary School  
13  
14 345 Children in Beijing, China: A Prospective Study. *International journal of medical*  
15  
16 346 *sciences* 2015;**12**(8):633-8.  
17  
18  
19  
20 347 6. He M, Xiang F, Zeng Y, *et al.* Effect of Time Spent Outdoors at School on the  
21  
22 348 Development of Myopia Among Children in China: A Randomized Clinical Trial.  
23  
24 349 *Jama* 2015;**314**(11):1142-8.  
25  
26  
27  
28 350 7. Xiong S, Sankaridurg P, Naduvilath T, *et al.* Time spent in outdoor activities in relation  
29  
30 351 to myopia prevention and control: a meta-analysis and systematic review. *Acta*  
31  
32 352 *ophthalmologica* 2017;**95**(6):551-66.  
33  
34  
35  
36 353 8. Mirshahi A, Ponto K, Hoehn R, *et al.* Myopia and level of education: results from the  
37  
38 354 Gutenberg Health Study. *Ophthalmology* 2014;**121**(10):2047-52.  
39  
40  
41  
42 355 9. Williams KM, Bertelsen G, Cumberland P, *et al.* Increasing Prevalence of Myopia in  
43  
44 356 Europe and the Impact of Education. *Ophthalmology* 2015;**122**(7):1489-97.  
45  
46  
47 357 10. Northstone K, Guggenheim JA, Howe LD, *et al.* Body stature growth trajectories  
48  
49 358 during childhood and the development of myopia. *Ophthalmology*  
50  
51 359 2013;**120**(5):1064-73.  
52  
53  
54  
55 360 11. Lee DC, Lee SY, Kim YC. An epidemiological study of the risk factors associated with

- 1  
2  
3  
4 361 myopia in young adult men in Korea. *Scientific reports* 2018;**8**(1):511.  
5  
6  
7 362 12. Morgan IG, Ohno-Matsui K, Saw S-M. Myopia. *Lancet* 2012;**379**(9827):1739-48.  
8  
9  
10 363 13. Goss DA, Cox VD, Herrin-Lawson GA, *et al.* Refractive error, axial length, and height  
11  
12 364 as a function of age in young myopes. *Optometry and vision science : official*  
13  
14 365 *publication of the American Academy of Optometry* 1990;**67**(5):332-8.  
15  
16  
17 366 14. Wang D, Ding X, Liu B, *et al.* Longitudinal changes of axial length and height are  
18  
19 367 associated and concomitant in children. *Investigative ophthalmology & visual*  
20  
21 368 *science* 2011;**52**(11):7949-53.  
22  
23  
24  
25 369 15. Prashar A, Hocking PM, Erichsen JT, *et al.* Common determinants of body size and  
26  
27 370 eye size in chickens from an advanced intercross line. *Experimental eye research*  
28  
29 371 2009;**89**(1):42-8.  
30  
31  
32  
33 372 16. Zhang J, Hur YM, Huang W, *et al.* Shared genetic determinants of axial length and  
34  
35 373 height in children: the Guangzhou twin eye study. *Archives of ophthalmology*  
36  
37 374 *(Chicago, Ill. : 1960)* 2011;**129**(1):63-8.  
38  
39  
40  
41 375 17. Saw SM, Chua WH, Hong CY, *et al.* Height and its relationship to refraction and  
42  
43 376 biometry parameters in Singapore Chinese children. *Investigative ophthalmology*  
44  
45 377 *& visual science* 2002;**43**(5):1408-13.  
46  
47  
48  
49 378 18. Rahi JS, Cumberland PM, Peckham CS. Myopia over the lifecourse: prevalence and  
50  
51 379 early life influences in the 1958 British birth cohort. *Ophthalmology*  
52  
53 380 2011;**118**(5):797-804.  
54  
55  
56  
57  
58  
59  
60

- 1  
2  
3  
4 381 19. Yip VC, Pan CW, Lin XY, *et al.* The relationship between growth spurts and myopia  
5  
6 382 in Singapore children. *Investigative ophthalmology & visual science*  
7  
8  
9 383 2012;**53**(13):7961-6.  
10  
11  
12 384 20. Rim TH, Kim SH, Lim KH, *et al.* Body Stature as an Age-Dependent Risk Factor for  
13  
14  
15 385 Myopia in a South Korean Population. *Seminars in ophthalmology* 2017;**32**(3):326-  
16  
17 386 36.  
18  
19  
20 387 21. Gardiner PA. Physical growth and the progress of myopia. *Lancet*  
21  
22  
23 388 1955;**269**(6897):952-3.  
24  
25  
26 389 22. Dirani M, Islam A, Baird PN. Body stature and myopia-The Genes in Myopia (GEM)  
27  
28 390 twin study. *Ophthalmic epidemiology* 2008;**15**(3):135-9.  
29  
30  
31 391 23. Wong TY, Foster PJ, Johnson GJ, *et al.* The relationship between ocular dimensions  
32  
33  
34 392 and refraction with adult stature: the Tanjong Pagar Survey. *Investigative*  
35  
36 393 *ophthalmology & visual science* 2001;**42**(6):1237-42.  
37  
38  
39 394 24. Ojaimi E, Morgan IG, Robaei D, *et al.* Effect of stature and other anthropometric  
40  
41  
42 395 parameters on eye size and refraction in a population-based study of Australian  
43  
44 396 children. *Investigative ophthalmology & visual science* 2005;**46**(12):4424-9.  
45  
46  
47 397 25. Wu HM, Gupta A, Newland HS, *et al.* Association between stature, ocular biometry  
48  
49  
50 398 and refraction in an adult population in rural Myanmar: the Meiktila eye study. *Clin*  
51  
52 399 *Exp Ophthalmol* 2007;**35**(9):834-39.  
53  
54  
55 400 26. Sharma A, Congdon N, Gao Y, *et al.* Height, stunting, and refractive error among rural

- 1  
2  
3  
4 401 Chinese schoolchildren: the See Well to Learn Well project. *American journal of*  
5  
6  
7 402 *ophthalmology* 2010;**149**(2):347-53.  
8  
9 403 27. Jung SK, Lee JH, Kakizaki H, *et al.* Prevalence of myopia and its association with body  
10  
11  
12 404 stature and educational level in 19-year-old male conscripts in seoul, South Korea.  
13  
14  
15 405 *Investigative ophthalmology & visual science* 2012;**53**(9):5579-83.  
16  
17 406 28. Huang CY, Hou CH, Lin KK, *et al.* Relationship of lifestyle and body stature growth  
18  
19  
20 407 with the development of myopia and axial length elongation in Taiwanese  
21  
22  
23 408 elementary school children. *Indian journal of ophthalmology* 2014;**62**(8):865-9.  
24  
25  
26 409 29. Rosner M, Laor A, Belkin M. Myopia and stature: findings in a population of 106,926  
27  
28  
29 410 males. *European journal of ophthalmology* 1995;**5**(1):1-6.  
30  
31 411 30. Baird P, Schäche M, Dirani M. The GENes in Myopia (GEM) study in understanding  
32  
33  
34 412 the aetiology of refractive errors. *Prog Retin Eye Res* 2010;**29**(6):520-42.  
35  
36  
37 413 31. Limony Y, Koziel S, Friger M. Age of onset of a normally timed pubertal growth spurt  
38  
39  
40 414 affects the final height of children. *Pediatr Res* 2015;**78**(3):351-5.  
41  
42 415 32. Ogueta SB, Schwartz SD, Yamashita CK, *et al.* Estrogen receptor in the human eye:  
43  
44  
45 416 influence of gender and age on gene expression. *Investigative ophthalmology &*  
46  
47  
48 417 *visual science* 1999;**40**(9):1906-11.  
49  
50 418 33. Lim LS, Gazzard G, Low Y-L, *et al.* Dietary Factors, Myopia, and Axial Dimensions  
51  
52  
53 419 in Children. *Ophthalmology* 2010;**117**(5):993-U195.  
54  
55  
56 420 34. You QS, Wu LJ, Duan JL, *et al.* Factors associated with myopia in school children in

- 1  
2  
3  
4 421 China: the Beijing childhood eye study. *PloS one* 2012;7(12):e52668.  
5  
6  
7 422 35. Lyu IJ, Kim MH, Baek SY, *et al.* The Association Between Menarche and Myopia:  
8  
9 423 Findings From the Korean National Health and Nutrition Examination, 2008-2012.  
10  
11  
12 424 *Investigative ophthalmology & visual science* 2015;56(8):4712-8.  
13  
14  
15 425

For peer review only



**Table 1** Summary of the characteristics of the participants.

|                               | Total          | Myopia         | Nonmyopia      | P Value |
|-------------------------------|----------------|----------------|----------------|---------|
| Age (years)                   | 9.42 ± 2.09    | 9.88 ± 2.14    | 8.30 ± 1.45    | <0.01   |
| Male                          | 264 (54.77)    | 187 (54.52)    | 77 (55.40)     | 0.86    |
| Parental myopia*              |                |                |                | <0.01   |
| None                          | 129 (28.48)    | 74 (23.13)     | 55 (41.35)     |         |
| One parent                    | 188 (41.50)    | 134 (41.88)    | 54 (40.60)     |         |
| Both parents                  | 136 (30.02)    | 112 (35.00)    | 24 (18.05)     |         |
| Monthly family income*        |                |                |                | <0.05   |
| <4000 RMB                     | 41 (8.78)      | 27 (8.16)      | 14 (10.29)     |         |
| 4000-8000 RMB                 | 136 (29.12)    | 89 (26.89)     | 47 (34.56)     |         |
| 8000-10,000 RMB               | 133 (28.48)    | 89 (26.89)     | 44 (32.35)     |         |
| 10,000-15,000 RMB             | 91 (19.49)     | 73 (22.05)     | 18 (13.24)     |         |
| ≥15,000 RMB                   | 66 (14.13)     | 53 (16.01)     | 13 (9.56)      |         |
| Reading and writing distance* |                |                |                | <0.05   |
| <10 cm                        | 45 (9.62)      | 36 (10.81)     | 9 (6.67)       |         |
| 10-20 cm                      | 200 (42.74)    | 148 (44.44)    | 52 (38.52)     |         |
| 20-30 cm                      | 166 (35.47)    | 117 (35.14)    | 49 (36.30)     |         |
| ≥30 cm                        | 57 (12.18)     | 32 (9.61)      | 25 (18.52)     |         |
| Time spent outdoors (hours)   | 1.20 ± 0.70    | 1.16 ± 0.70    | 1.31 ± 0.69    | <0.05   |
| Height (cm)                   | 140.79 ± 13.95 | 143.85 ± 14.17 | 133.22 ± 10.01 | <0.01   |
| Weight (kg)                   | 38.29 ± 10.86  | 40.06 ± 11.05  | 33.92 ± 9.01   | <0.01   |
| BMI (kg/m <sup>2</sup> )      | 19.04 ± 3.18   | 19.10 ± 3.14   | 18.89 ± 3.28   | 0.52    |
| SER (D)                       | -1.48 ± 1.82   | -2.20 ± 1.66   | 0.30 ± 0.54    | <0.01   |
| AL (mm)                       | 23.81 ± 1.12   | 24.16 ± 1.07   | 22.95 ± 0.72   | <0.01   |
| CCT (μm)                      | 547.65 ± 32.44 | 548.88 ± 33.32 | 544.63 ± 30.05 | 0.19    |

|             |              |              |              |       |
|-------------|--------------|--------------|--------------|-------|
| ACD (mm)    | 3.08 ± 0.26  | 3.14 ± 0.25  | 2.94 ± 0.23  | <0.01 |
| LT (mm)     | 3.47 ± 0.20  | 3.43 ± 0.20  | 3.55 ± 0.19  | <0.01 |
| VCD (mm)    | 17.27 ± 1.09 | 17.60 ± 1.05 | 16.46 ± 0.71 | <0.01 |
| CC (mm)     | 7.78 ± 0.26  | 7.78 ± 0.25  | 7.79 ± 0.26  | 0.84  |
| AL/CC ratio | 3.06 ± 0.13  | 3.11 ± 0.13  | 2.95 ± 0.07  | <0.01 |

Data presented as means with standard deviation (SD) or as n (%).

\*Numbers of individuals vary due to missing data.

**Table 2** Bivariate correlations of body stature with refraction and ocular biometrics.

|             | Height (cm) | Weight (kg) | BMI (kg/m <sup>2</sup> ) |
|-------------|-------------|-------------|--------------------------|
| SER (D)     | -0.45**     | -0.39**     | -0.11*                   |
| AL (mm)     | 0.50**      | 0.45**      | 0.15*                    |
| CCT (µm)    | 0.17**      | 0.19**      | 0.09*                    |
| ACD (mm)    | 0.29**      | 0.22**      | 0.03                     |
| LT (mm)     | -0.24**     | -0.19**     | -0.04                    |
| VCD (mm)    | 0.49**      | 0.44**      | 0.16**                   |
| CC (mm)     | 0.07        | 0.10*       | 0.08                     |
| AL/CC ratio | 0.49**      | 0.40**      | 0.10*                    |

Data are the Pearson correlation coefficients.

\*:  $P < 0.05$ .

\*\* :  $P < 0.01$ .

1  
2  
3  
4  
5  
6  
7  
8  
9  
10  
11  
12  
13  
14  
15  
16  
17  
18  
19  
20  
21  
22  
23  
24  
25  
26  
27  
28  
29  
30  
31  
32  
33  
34  
35  
36  
37  
38  
39  
40  
41  
42  
43  
44  
45  
46  
47  
48  
49  
50  
51  
52  
53  
54  
55  
56  
57  
58  
59  
60

For peer review only

**Table 3** Unadjusted mean values of refraction and ocular biometrics by quartiles of height, weight and BMI.

|                               | Range       | n   | SER (D)                  | AL (mm)          | CCT ( $\mu\text{m}$ ) | ACD (mm)        |
|-------------------------------|-------------|-----|--------------------------|------------------|-----------------------|-----------------|
| <i>Height (cm)</i>            |             |     |                          |                  |                       |                 |
| 1st quartile                  | 100.0~130.0 | 127 | $-0.48 \pm 1.13^\dagger$ | $23.09 \pm 0.78$ | $542.11 \pm 30.93$    | $2.97 \pm 0.24$ |
| 2nd quartile                  | 130.1~140.0 | 136 | $-1.08 \pm 1.46$         | $23.58 \pm 0.98$ | $544.96 \pm 32.69$    | $3.05 \pm 0.28$ |
| 3rd quartile                  | 140.1~150.7 | 99  | $-1.86 \pm 1.80$         | $24.15 \pm 1.01$ | $550.04 \pm 32.31$    | $3.16 \pm 0.23$ |
| 4th quartile                  | 150.8~182.5 | 120 | $-2.68 \pm 2.06$         | $24.56 \pm 1.14$ | $554.58 \pm 32.76$    | $3.18 \pm 0.22$ |
| <i>P</i> for trend‡           |             |     | <i>P</i> <0.01           | <i>P</i> <0.01   | <i>P</i> <0.05        | <i>P</i> <0.01  |
| <i>Weight (kg)</i>            |             |     |                          |                  |                       |                 |
| 1st quartile                  | 20.0~30.0   | 129 | $-0.59 \pm 1.19$         | $23.19 \pm 0.80$ | $541.27 \pm 32.75$    | $3.02 \pm 0.26$ |
| 2nd quartile                  | 30.1~36.1   | 112 | $-1.12 \pm 1.30$         | $23.58 \pm 1.00$ | $547.64 \pm 31.34$    | $3.04 \pm 0.26$ |
| 3rd quartile                  | 36.2~45.0   | 128 | $-1.75 \pm 1.92$         | $24.02 \pm 1.12$ | $544.17 \pm 31.56$    | $3.12 \pm 0.24$ |
| 4th quartile                  | 45.1~82.3   | 113 | $-2.54 \pm 2.14$         | $24.52 \pm 1.12$ | $558.92 \pm 31.65$    | $3.16 \pm 0.24$ |
| <i>P</i> for trend            |             |     | <i>P</i> <0.01           | <i>P</i> <0.01   | <i>P</i> <0.01        | <i>P</i> <0.01  |
| <i>BMI (kg/m<sup>2</sup>)</i> |             |     |                          |                  |                       |                 |
| 1st quartile                  | 14.0~16.5   | 121 | $-1.19 \pm 1.62$         | $23.55 \pm 1.05$ | $543.79 \pm 31.55$    | $3.09 \pm 0.25$ |
| 2nd quartile                  | 16.6~18.4   | 120 | $-1.39 \pm 1.69$         | $23.80 \pm 1.14$ | $545.79 \pm 32.26$    | $3.05 \pm 0.28$ |
| 3rd quartile                  | 18.5~20.8   | 120 | $-1.59 \pm 1.88$         | $23.90 \pm 1.12$ | $547.12 \pm 32.16$    | $3.09 \pm 0.25$ |

1  
2  
3  
4  
5  
6  
7  
8  
9  
10  
11  
12  
13  
14  
15  
16  
17  
18  
19  
20  
21  
22  
23  
24  
25  
26  
27  
28  
29  
30  
31  
32  
33  
34  
35  
36  
37  
38  
39  
40  
41  
42  
43  
44  
45  
46  
47

|                               | Range     | n   | LT (mm)        | VCD (mm)       | CC (mm)        | AL/CC ratio    |
|-------------------------------|-----------|-----|----------------|----------------|----------------|----------------|
| <i>Height (cm)</i>            |           |     |                |                |                |                |
| 4th quartile                  | 20.9~30.6 | 121 | -1.74 ± 2.05   | 24.00 ± 1.16   | 533.90 ± 33.26 | 3.11 ± 0.25    |
| <i>P</i> for trend            |           |     | <i>P</i> <0.05 | <i>P</i> <0.01 | <i>P</i> <0.05 | <i>P</i> =0.32 |
| <i>Weight (kg)</i>            |           |     |                |                |                |                |
| 1st quartile                  | 20.0~30.0 | 129 | 3.51 ± 0.20    | 16.64 ± 0.77   | 7.75 ± 0.25    | 2.99 ± 0.10    |
| 2nd quartile                  | 30.1~36.1 | 112 | 3.49 ± 0.21    | 17.07 ± 0.97   | 7.78 ± 0.28    | 3.03 ± 0.11    |
| 3rd quartile                  | 36.2~45.0 | 128 | 3.45 ± 0.21    | 17.46 ± 1.10   | 7.80 ± 0.24    | 3.08 ± 0.13    |
| 4th quartile                  | 45.1~82.3 | 113 | 3.40 ± 0.19    | 17.95 ± 1.08   | 7.81 ± 0.25    | 3.14 ± 0.15    |
| <i>P</i> for trend            |           |     | <i>P</i> <0.01 | <i>P</i> <0.01 | <i>P</i> =0.08 | <i>P</i> <0.01 |
| <i>BMI (kg/m<sup>2</sup>)</i> |           |     |                |                |                |                |
| 1st quartile                  | 14.0~16.5 | 121 | 3.45 ± 0.18    | 17.01 ± 1.05   | 7.73 ± 0.26    | 3.05 ± 0.12    |
| 2nd quartile                  | 16.6~18.4 | 120 | 3.51 ± 0.23    | 17.23 ± 1.04   | 7.81 ± 0.26    | 3.05 ± 0.13    |

|                    |           |     |                |                |                |                |
|--------------------|-----------|-----|----------------|----------------|----------------|----------------|
| 3rd quartile       | 18.5~20.8 | 120 | 3.46 ± 0.20    | 17.38 ± 1.11   | 7.81 ± 0.26    | 3.06 ± 0.14    |
| 4th quartile       | 20.9~30.6 | 121 | 3.44 ± 0.20    | 17.46 ± 1.13   | 7.79 ± 0.24    | 3.08 ± 0.14    |
| <i>P</i> for trend |           |     | <i>P</i> =0.37 | <i>P</i> <0.01 | <i>P</i> =0.19 | <i>P</i> <0.05 |

†Data are expressed as means ± SD.

‡Tests for linear trend is performed by entering the median value of each category of the anthropometric indicator as a continuous variable in the models.

**Table 4** Multiple linear regression models of refraction and ocular biometry by height, weight, and BMI.

|                          | <b>Model 1</b>        | <b><i>P</i> Value</b> | <b>Model 2</b>       | <b><i>P</i> Value</b> | <b>Model 3</b>       | <b><i>P</i> Value</b> |
|--------------------------|-----------------------|-----------------------|----------------------|-----------------------|----------------------|-----------------------|
| <i>Height (per 10cm)</i> |                       |                       |                      |                       |                      |                       |
| SER (D)                  | -0.59 (-0.70, -0.49)† | <0.01                 | -0.26 (-0.45, -0.08) | <0.01                 | -0.21 (-0.40, -0.01) | <0.05                 |
| AL (mm)                  | 0.40 (0.34, 0.47)     | <0.01                 | 0.18 (0.07, 0.29)    | <0.01                 | 0.14 (0.03, 0.26)    | <0.05                 |
| CCT (µm)                 | 4.03 (1.97, 6.08)     | <0.01                 | 2.43 (-1.29, 6.16)   | 0.20                  | 3.41 (-0.76, 7.58)   | 0.11                  |
| ACD (mm)                 | 0.05 (0.04, 0.07)     | <0.01                 | 0.02 (-0.01, 0.05)   | 0.17                  | 0.02 (-0.02, 0.05)   | 0.34                  |
| LT (mm)                  | -0.04 (-0.05, -0.02)  | <0.01                 | -0.01 (-0.03, 0.02)  | 0.57                  | -0.01 (-0.03, 0.02)  | 0.75                  |
| VCD (mm)                 | 0.38 (0.32, 0.44)     | <0.01                 | 0.17 (0.06, 0.27)    | <0.01                 | 0.13 (0.02, 0.25)    | <0.05                 |
| CC (mm)                  | 0.01 (-0.01, 0.03)    | 0.13                  | 0.01 (-0.02, 0.04)   | 0.41                  | 0.01 (-0.03, 0.04)   | 0.81                  |

|    |                                     |                      |       |                      |       |                     |       |
|----|-------------------------------------|----------------------|-------|----------------------|-------|---------------------|-------|
| 1  |                                     |                      |       |                      |       |                     |       |
| 2  |                                     |                      |       |                      |       |                     |       |
| 3  |                                     |                      |       |                      |       |                     |       |
| 4  |                                     |                      |       |                      |       |                     |       |
| 5  | AL/CC ratio                         | 0.05 (0.04, 0.06)    | <0.01 | 0.02 (0.01, 0.03)    | <0.01 | 0.02 (0.01, 0.03)   | <0.05 |
| 6  |                                     |                      |       |                      |       |                     |       |
| 7  | <i>Weight (per 10kg)</i>            |                      |       |                      |       |                     |       |
| 8  |                                     |                      |       |                      |       |                     |       |
| 9  | SER (D)                             | -0.65 (-0.79, -0.51) | <0.01 | -0.21 (-0.39, -0.03) | <0.05 | -0.18 (-0.36, 0.01) | 0.07  |
| 10 |                                     |                      |       |                      |       |                     |       |
| 11 | AL (mm)                             | 0.46 (0.38, 0.55)    | <0.01 | 0.16 (0.05, 0.26)    | <0.01 | 0.15 (0.04, 0.26)   | <0.01 |
| 12 |                                     |                      |       |                      |       |                     |       |
| 13 | CCT ( $\mu$ m)                      | 5.56 (2.93, 8.20)    | <0.01 | 3.68 (0.06, 7.29)    | <0.05 | 4.44 (0.42, 8.47)   | <0.05 |
| 14 |                                     |                      |       |                      |       |                     |       |
| 15 | ACD (mm)                            | 0.05 (0.03, 0.07)    | <0.01 | -0.01 (-0.03, 0.02)  | 0.90  | -0.01 (-0.03, 0.03) | 0.87  |
| 16 |                                     |                      |       |                      |       |                     |       |
| 17 | LT (mm)                             | -0.04 (-0.05, -0.02) | <0.01 | 0.01 (-0.02, 0.02)   | 0.95  | 0.01 (-0.02, 0.03)  | 0.96  |
| 18 |                                     |                      |       |                      |       |                     |       |
| 19 | VCD (mm)                            | 0.44 (0.36, 0.53)    | <0.01 | 0.16 (0.06, 0.27)    | <0.01 | 0.15 (0.04, 0.26)   | <0.01 |
| 20 |                                     |                      |       |                      |       |                     |       |
| 21 | CC (mm)                             | 0.03 (0.01, 0.05)    | <0.05 | 0.02 (-0.01, 0.05)   | 0.11  | 0.02 (-0.01, 0.05)  | 0.14  |
| 22 |                                     |                      |       |                      |       |                     |       |
| 23 | AL/CC ratio                         | 0.05 (0.04, 0.06)    | <0.01 | 0.01 (-0.01, 0.02)   | 0.10  | 0.01 (-0.01, 0.02)  | 0.16  |
| 24 |                                     |                      |       |                      |       |                     |       |
| 25 | <i>BMI (per 10kg/m<sup>2</sup>)</i> |                      |       |                      |       |                     |       |
| 26 |                                     |                      |       |                      |       |                     |       |
| 27 | SER (D)                             | -0.64 (-1.15, -0.13) | <0.05 | -0.26 (-0.73, 0.20)  | 0.26  | -0.27 (-0.74, 0.20) | 0.25  |
| 28 |                                     |                      |       |                      |       |                     |       |
| 29 | AL (mm)                             | 0.53 (0.21, 0.84)    | <0.01 | 0.20 (-0.07, 0.47)   | 0.15  | 0.23 (-0.05, 0.50)  | 0.10  |
| 30 |                                     |                      |       |                      |       |                     |       |
| 31 | CCT ( $\mu$ m)                      | 9.50 (0.35, 18.65)   | <0.05 | 6.37 (-2.79, 15.53)  | 0.17  | 7.19 (-2.87, 17.25) | 0.16  |
| 32 |                                     |                      |       |                      |       |                     |       |
| 33 | ACD (mm)                            | 0.03 (-0.05, 0.10)   | 0.50  | -0.03 (-0.10, 0.04)  | 0.46  | -0.02 (-0.10, 0.05) | 0.52  |
| 34 |                                     |                      |       |                      |       |                     |       |
| 35 | LT (mm)                             | -0.02 (-0.08, 0.03)  | 0.42  | 0.01 (-0.05, 0.07)   | 0.79  | 0.01 (-0.06, 0.07)  | 0.86  |
| 36 |                                     |                      |       |                      |       |                     |       |
| 37 | VCD (mm)                            | 0.55 (0.24, 0.85)    | <0.01 | 0.23 (-0.03, 0.50)   | 0.09  | 0.25 (-0.03, 0.52)  | 0.08  |
| 38 |                                     |                      |       |                      |       |                     |       |
| 39 | CC (mm)                             | 0.06 (-0.01, 0.14)   | 0.09  | 0.04 (-0.03, 0.11)   | 0.25  | 0.06 (-0.02, 0.14)  | 0.13  |
| 40 |                                     |                      |       |                      |       |                     |       |
| 41 |                                     |                      |       |                      |       |                     |       |
| 42 |                                     |                      |       |                      |       |                     |       |
| 43 |                                     |                      |       |                      |       |                     |       |
| 44 |                                     |                      |       |                      |       |                     |       |
| 45 |                                     |                      |       |                      |       |                     |       |
| 46 |                                     |                      |       |                      |       |                     |       |
| 47 |                                     |                      |       |                      |       |                     |       |

|             |                   |       |                    |      |                    |      |
|-------------|-------------------|-------|--------------------|------|--------------------|------|
| AL/CC ratio | 0.04 (0.01, 0.08) | <0.05 | 0.01 (-0.02, 0.04) | 0.58 | 0.01 (-0.03, 0.04) | 0.67 |
|-------------|-------------------|-------|--------------------|------|--------------------|------|

†Each value represents a separate regression model, with height, weight, or BMI used as the independent variable, the refraction or individual ocular biometrics used as the dependent variable, either alone or with various confounders. Data in parentheses represents the 95% confidence interval.

Model 1 constructs based on crude data. In the next two models, we controlled, in turn, for age and gender or for age, gender, parental myopia, family income, reading and writing distance, and time spent outdoors.



# BMJ Open

## Associations between anthropometric indicators and both refraction and ocular biometrics in a cross-sectional study of Chinese schoolchildren

|                                 |                                                                                                                                                                                                                                                                                                                                                                                                                 |
|---------------------------------|-----------------------------------------------------------------------------------------------------------------------------------------------------------------------------------------------------------------------------------------------------------------------------------------------------------------------------------------------------------------------------------------------------------------|
| Journal:                        | <i>BMJ Open</i>                                                                                                                                                                                                                                                                                                                                                                                                 |
| Manuscript ID                   | bmjopen-2018-027212.R1                                                                                                                                                                                                                                                                                                                                                                                          |
| Article Type:                   | Research                                                                                                                                                                                                                                                                                                                                                                                                        |
| Date Submitted by the Author:   | 04-Jan-2019                                                                                                                                                                                                                                                                                                                                                                                                     |
| Complete List of Authors:       | Ye, Sheng; School of Public Health, Tianjin Medical University<br>Liu, Shengxin; School of Public Health, Tianjin Medical University<br>Li, Wenlei; School of Public Health, Tianjin Medical University<br>Wang, Qifan; School of Public Health, Tianjin Medical University<br>Xi, Wei; School of Public Health, Tianjin Medical University<br>Zhang , Xin; School of Public Health, Tianjin Medical University |
| <b>Primary Subject Heading</b>: | Public health                                                                                                                                                                                                                                                                                                                                                                                                   |
| Secondary Subject Heading:      | Ophthalmology, Epidemiology                                                                                                                                                                                                                                                                                                                                                                                     |
| Keywords:                       | anthropometric indicators, refraction, ocular biometrics, schoolchildren                                                                                                                                                                                                                                                                                                                                        |
|                                 |                                                                                                                                                                                                                                                                                                                                                                                                                 |

SCHOLARONE™  
Manuscripts

1  
2  
3  
4 1 **Associations between anthropometric indicators and both refraction**  
5  
6 2 **and ocular biometrics in a cross-sectional study of Chinese**  
7  
8 3 **schoolchildren**

9  
10  
11  
12 4  
13  
14  
15 5 **Sheng Ye, Shengxin Liu, Wenlei Li, Qifan Wang, Wei Xi, and Xin Zhang**

16  
17 6 Department of Maternal, Child and Adolescent Health, School of Public Health, Tianjin  
18  
19 7 Medical University, Tianjin, China.

20  
21  
22  
23 8 SY and SL contributed equally to the work presented here and should therefore be  
24  
25 9 regarded as equivalent authors.

26  
27  
28  
29  
30  
31 10  
32 11 **Correspondence to**

33  
34 12 Prof. Xin Zhang, Department of Maternal, Child and Adolescent Health, School of  
35  
36 13 Public Health, Tianjin Medical University, No. 22 Qixiangtai Road, Tianjin 300070,  
37  
38 14 China; zhangxin@tmu.edu.cn.

39  
40  
41  
42  
43  
44 15  
45 16 **Synopsis**

46  
47 17 The development of refraction may be related to physical development during early  
48  
49 18 adolescent growth. The shared mechanism between body stature and refraction could  
50  
51 19 shed new light on the etiology of myopia.

52  
53  
54  
55 20  
56  
57  
58 21  
59  
60

1  
2  
3  
4 22 **ABSTRACT**

5  
6  
7 23 **Objective** To identify associations between anthropometric indicators, including height,  
8  
9 24 weight, and body mass index (BMI), and both refraction and ocular biometrics in  
10  
11  
12 25 Chinese schoolchildren in Tianjin, China.

13  
14  
15 26 **Design** Cross-sectional study.

16  
17  
18 27 **Participants** A total of 482 (86.07%) students (6 to 15 years old) with no recorded  
19  
20 28 history of ocular or systemic pathologies were enrolled in this study.

21  
22  
23 29 **Methodology** Height and weight were measured using standardized protocols. Ocular  
24  
25 30 biometrics, such as axial length (AL), vitreous chamber depth (VCD), and corneal  
26  
27 31 curvature (CC), were measured by a low-coherence optical reflectometry device. The  
28  
29 32 AL/CC ratio was calculated. Cycloplegic refraction was measured using autorefraction,  
30  
31 33 and spherical equivalent refraction (SER) was calculated. Myopia was defined as SER  
32  
33 34  $\leq -0.50$  diopters (D). Multiple linear regression analysis was performed to explore the  
34  
35 35 associations between anthropometric indicators and both refraction and ocular  
36  
37 36 biometrics.

38  
39 37 **Results** The overall prevalence of myopia was 71.16%. Overall, only height was  
40  
41 38 associated with AL, VCDs, AL/CC ratios, and refractions after controlling for age,  
42  
43 39 gender, parental myopia, family income, reading and writing distance, and time spent  
44  
45 40 outdoors. Furthermore, age-specific results demonstrated that both height and weight  
46  
47 41 were independently associated with refraction in only 6- to 8-year-old and 9- to 11-  
48  
49 42 year-old participants. Especially from 9 to 11 years of age, higher heights in  
50  
51  
52  
53  
54  
55  
56  
57  
58  
59  
60

1  
2  
3  
4 43 schoolchildren were associated with longer ALs (regression coefficient  $b=+0.25$  for  
5  
6  
7 44 each 10 cm difference in height,  $P<0.01$ ), deeper VCDs ( $b=+0.23$ ,  $P<0.01$ ), higher  
8  
9  
10 45 AL/CC ratios ( $b=+0.04$ ,  $P<0.01$ ), and more negative refractions ( $b=-0.48$ ,  $P<0.01$ ) in  
11  
12 46 their eyes. The association pattern in weight was almost the same as that in height.

13  
14  
15 47 **Conclusions** Height and weight remained independently related to refraction and  
16  
17 48 various ocular biometrics during the early period of adolescent growth after adequately  
18  
19  
20 49 controlling for covariates, which could support the idea that a shared mechanism may  
21  
22  
23 50 regulate the coordinated growth of body and eye size in children.

24  
25  
26 51 **Keywords:** anthropometric indicators, refraction, ocular biometrics, schoolchildren  
27  
28  
29 52

30  
31 53 **Strengths and limitations of this study**

- 32  
33  
34 54 ● The study participants were schoolchildren ranging in age from 6 to 15 years old,  
35  
36 55 a period when myopia commonly develops, which could allow us to study the  
37  
38  
39 56 association between body stature and refraction during development.  
40  
41  
42 57 ● The overall and age-specific associations between anthropometric indicators and  
43  
44 58 both refraction and ocular biometrics were calculated in this study to help better  
45  
46  
47 59 clarify the coordinated growth of body and eye size.  
48  
49  
50 60 ● Ocular biometrics were measured comprehensively, and the covariates were  
51  
52  
53 61 adequately controlled, which allowed us to achieve a more detailed analysis.  
54  
55  
56 62 ● An evaluation of causality was not possible because this study had a cross-sectional  
57  
58  
59 63 design.  
60

64

**65 Introduction**

66 Myopia has reached almost epidemic proportions in the world, especially in certain  
67 areas of East and Southeast Asia.<sup>1</sup> This condition is commonly viewed as etiologically  
68 heterogeneous. Genetic and environmental risk factors are involved in its progression.  
69 The genetic basis of myopia has been supported by evidence indicating high heritability  
70 values in twin studies<sup>2</sup> and a higher prevalence of myopia in children with myopic  
71 parents.<sup>3</sup> Excessive near work activities,<sup>4,5</sup> limited time spent outdoors,<sup>6,7</sup> and intensive  
72 educational pressure<sup>8,9</sup> reportedly to promote the development of myopia. In our effort  
73 to consider other factors, we noted that anthropometric indicators, such as height, are  
74 thought to be associated with refraction, although no consensus has been achieved  
75 regarding this issue.<sup>10,11</sup>

76 Refractive status is determined by the balance of the refractive power of the cornea  
77 and lens, and the axial length (AL) of the eye (representing the combination of anterior  
78 chamber depth (ACD), lens thickness (LT), and vitreous chamber depth (VCD)).<sup>12</sup>  
79 Myopia usually arises in an eye that has become too long, particularly via vitreous  
80 chamber elongation. Several epidemiological studies have demonstrated that changes  
81 in ocular dimensions that occur in early life progress concomitant with physical  
82 development in children,<sup>13,14</sup> and the ages of cessation are also similar for increases in  
83 height and axial elongation.<sup>13</sup> Furthermore, genetic studies have confirmed that a  
84 common genetic pathway underlies both height and AL,<sup>15,16</sup> although no specific

1  
2  
3  
4 85 genetic variants have yet been identified. All of these clues suggest a shared mechanism  
5  
6  
7 86 that regulates the coordinated growth of body and eye size. It has been suggested that  
8  
9  
10 87 there may be a relationship between body stature and refraction. However, in contrast  
11  
12 88 to the consensus regarding the significant associations between body stature and AL,  
13  
14  
15 89 the relationship between body stature and refraction remains controversial. Although  
16  
17 90 many studies have reported that taller<sup>10 17-20</sup> and heavier persons<sup>21 22</sup> have an increased  
18  
19  
20 91 likelihood of having myopia, other studies have found no such association.<sup>23-28</sup> The  
21  
22  
23 92 discrepancies among these studies may be due to differences in sample sizes, concept  
24  
25  
26 93 definitions or other methodological variations (e.g., height and weight obtained via self-  
27  
28  
29 94 reporting).

30  
31 95 In China, few studies have comprehensively measured ocular biometrics or further  
32  
33  
34 96 explored their associations with body stature. Additionally, myopia most commonly  
35  
36  
37 97 starts in young schoolchildren and progresses in early adolescence.<sup>21</sup> Therefore, it is  
38  
39  
40 98 most appropriate to study the effect of body growth on refractive development in young,  
41  
42  
43 99 growing students. In the current survey, we explored the associations between  
44  
45  
46 100 anthropometric indicators, including height, weight, and BMI, and both refraction and  
47  
48  
49 101 ocular biometrics in schoolchildren aged 6 to 15 years old in Tianjin, China.

50 102

## 51 52 53 103 **METHODS**

### 54 55 104 **Recruitment**

56  
57  
58 105 Participants were recruited based on the following strategies. Two districts were  
59  
60

1  
2  
3  
4 106 randomly chosen from the 6 main urban districts in Tianjin in November 2016. Next,  
5  
6  
7 107 one primary school and one junior high school were randomly selected from each  
8  
9  
10 108 selected district. Then, one class was randomly chosen from each grade level within the  
11  
12 109 two selected schools. All students in these selected classes were invited, but  
13  
14  
15 110 participation in this study was voluntary. After the purposes and procedures of the study  
16  
17 111 were explained to each student and their parents in depth, written informed consent was  
18  
19  
20 112 collected. Students without parental consent and students who had amblyopia,  
21  
22  
23 113 heterotropia, or any ocular or systemic pathologies were excluded.

24  
25  
26 114 The study protocol was approved by the Ethics Committee of Tianjin Medical  
27  
28 115 University and performed in accordance with the tenets of the Declaration of Helsinki.

### 30 116 **Ocular examinations**

31  
32  
33  
34 117 All participants underwent a comprehensive eye examination, including measurements  
35  
36 118 of intraocular pressure, a slit-lamp examination of the anterior and posterior segments,  
37  
38  
39 119 cycloplegic autorefractometry and ocular biometrics. The purpose of intraocular pressure  
40  
41  
42 120 measurement and slit-lamp examination was to exclude contraindications for mydriasis.

43  
44  
45 121 Ocular biometrics, such as AL, central corneal thickness (CCT), ACD, LT, VCD,  
46  
47 122 and corneal curvature (CC), were measured with a low-coherence optical reflectometry  
48  
49  
50 123 device (Lenstar LS900; Haag-Streit AG, 3098 Koeniz, Switzerland) in both eyes before  
51  
52  
53 124 pupil dilation. In addition, the AL/CC ratio, also commonly known as the axial  
54  
55 125 length/corneal radius (AL/CR) ratio, was calculated. Then, cycloplegia was induced by  
56  
57  
58 126 administering one drop containing 0.5% tropicamide and 0.5% phenylephrine in a  
59  
60

1  
2  
3  
4 127 mixed eye agent to each eye at 0 and 5 minutes. Twenty-five minutes after the second  
5  
6  
7 128 instillation, pupillary dilation and the pupillary light reflex were evaluated. Full  
8  
9  
10 129 cycloplegia was considered when the pupil diameter reached 6 mm or more and the  
11  
12 130 light reflex disappeared. A third drop was administered if full cycloplegia was not  
13  
14  
15 131 achieved. Then, participants with full cycloplegia underwent autorefractometry using an  
16  
17 132 auto-kerato-refractor (Canon Autorefractor RK-F1, Tokyo, Japan), and 3 consecutive  
18  
19  
20 133 measurements were taken in both eyes. The mean value of 3 valid measurements was  
21  
22  
23 134 calculated for statistical analysis. All of the above instruments were calibrated before  
24  
25  
26 135 the ocular examination. All examinations were performed by board-certified  
27  
28  
29 136 ophthalmologists and certified optometrists.

### 31 137 **Definitions**

32  
33  
34 138 The SER of each eye was calculated as the spherical refraction + 1/2 of the cylindrical  
35  
36  
37 139 refraction using data obtained using the autorefractor. Myopia was defined as an SER  
38  
39  
40 140 of  $\leq -0.5$  D.

### 41 141 **Anthropometric measurements**

42  
43  
44  
45 142 Height and weight were obtained following specific standardized protocols<sup>29</sup> and  
46  
47  
48 143 measured by community doctors on the students' campus. Height was determined with  
49  
50  
51 144 the subject standing barefoot on the base of the height meter and recorded in centimeters  
52  
53  
54 145 (cm). Weight was measured without shoes and heavy coats on a calibrated electronic  
55  
56  
57 146 weighing scale and recorded in kilograms (kg). BMI was calculated as weight/height<sup>2</sup>  
58  
59  
60 147 and recorded in kilograms per square meter (kg/m<sup>2</sup>).



## 148 **Questionnaire**

149 The parents of participants and those excluded were all asked to complete a  
150 questionnaire developed to collect information on social-demographic characteristics  
151 and potential risk factors for school myopia (supplementary Table 1).

152 The basic characteristics of the participants included age, gender, the monthly  
153 income of the family, and the number of parents with myopia. Near-work-related  
154 behaviors were ascertained with the question “What is the distance between your child's  
155 eyes and a book when reading or writing?”, with answers categorized as follows: <10  
156 cm, 10-19 cm, 20-29 cm, and  $\geq 30$  cm. Time spent outdoors was estimated by asking  
157 how many hours per day the child spent on outdoor activities during weekdays and  
158 weekends separately. The average time spent outdoors was calculated by the following  
159 formula:  $[T_{\text{weekday}} (\text{hours spent on weekdays}) \times 5 + T_{\text{weekend}} (\text{hours spent on weekends})$   
160  $\times 2] \div 7$ .

## 161 **Statistical analysis**

162 Because refraction and ocular biometrics were highly correlated between two eyes (the  
163 Pearson correlation coefficients ( $r$ ) for refraction and AL were 0.90,  $P < 0.01$  and 0.96,  
164  $P < 0.01$ , respectively), the data obtained from the right eye were chosen for analyses.

165 Ocular biometrics were all normally distributed, as determined by P-P plots.

166 T-tests were performed for quantitative variables, and chi-square tests were  
167 performed for categorical variables to analyze the differences in basic characteristics  
168 between individuals with and without myopia. Univariate associations between

1  
2  
3  
4 169 anthropometric indicators and both refraction and ocular biometrics were identified.  
5  
6  
7 170 Simple linear regression models were constructed to assess the effects of height, weight,  
8  
9  
10 171 and BMI (as independent variables) on refraction and individual ocular biometrics (as  
11  
12 172 dependent variables). Tests for linear trends were performed by entering the median  
13  
14  
15 173 value of each category of the anthropometric indicator based on quartiles as a  
16  
17  
18 174 continuous variable into the models. Multiple linear regression models were then fitted  
19  
20  
21 175 after adjusting, in turn, for age and gender or for age, gender, parental myopia,  
22  
23 176 family income, reading and writing distance, and time spent outdoors. In addition, all  
24  
25  
26 177 participants were divided into the following age groups: 6 to 8 years old, 9 to 11 years  
27  
28 178 old, and 12 to 15 years old. The results of age-specific associations of anthropometric  
29  
30  
31 179 indicators with both refraction and ocular biometrics after controlling for the above  
32  
33  
34 180 covariates were calculated. Collinearity diagnostics were performed, and  
35  
36  
37 181 multicollinearity was absent among the independent variables used in each model.

38  
39 182 Statistical analyses were performed using commercial statistical software (SPSS for  
40  
41  
42 183 Windows, version 20.0; IBM-SPSS, Chicago, Illinois, USA), and *P* values <0.05 were  
43  
44  
45 184 considered statistically significant.

#### 46 47 185 **Patient and public involvement**

48  
49  
50 186 Patients and the public were not involved in developing the research questionnaire,  
51  
52  
53 187 outcome measures or overall design of this study protocol.

54  
55  
56 188

#### 57 58 189 **RESULTS**

## 190 **Participant characteristics**

191 Among 560 students who were initially invited, a total of 482 participants ranging in  
192 age from 6 to 15 years old were available for statistical analysis after excluding 70  
193 students without parental consent, 5 students with heterotropia, and 3 students with  
194 amblyopia. The response rate in this study was 86.07% (482 of 560). Individuals who  
195 were included were older ( $9.42 \pm 2.09$  vs  $7.60 \pm 2.38$  years old,  $P < 0.01$ ) than those who  
196 were excluded. There were no significant differences in gender, parental myopia,  
197 monthly family income, reading and writing distance, and time spent outdoors between  
198 included and excluded individuals.

199 The overall prevalence of myopia was 71.16% (343 of 482; 95% CI, 67.01% to  
200 75.10%). The mean SER, height, weight and BMI of all participants was  $-1.48 \pm 1.82$   
201 D,  $140.79 \pm 13.95$  cm,  $38.29 \pm 10.86$  kg, and  $19.04 \pm 3.18$  kg/m<sup>2</sup>, respectively (Table  
202 1). Participants with myopia were older, taller, and heavier. These individuals were  
203 more likely to have myopic parents, a higher monthly family income, a closer reading  
204 and writing distance and to spend less time outdoors. Moreover, these participants had  
205 eyes with longer ALs, deep ACDs and VCDs, thinner LTs, and larger AL/CC ratios (all  
206  $P$  values were less than 0.05).

## 207 **Bivariate correlations between variables**

208 Bivariate correlations of body stature with both refraction and ocular biometrics are  
209 presented in Table 2, which was of low to moderate strength. For example, height was  
210 positively correlated with AL ( $r = 0.50$ ,  $P < 0.01$ ), CCT ( $r = 0.17$ ,  $P < 0.01$ ), ACD ( $r = 0.29$ ,

1  
2  
3  
4 211  $P<0.01$ ), VCD ( $r=0.49$ ,  $P<0.01$ ) and the AL/CC ratio ( $r=0.49$ ,  $P<0.01$ ) and negatively  
5  
6  
7 212 correlated with SER ( $r=-0.45$ ,  $P<0.01$ ) and LT ( $r=-0.24$ ,  $P<0.01$ ).

8  
9 213 **Linear trends in refraction and ocular biometrics changes by body stature**  
10  
11  
12 214 **quartiles**

13  
14  
15 215 Taller and heavier individuals tended to have eyes with longer ALs, thicker CCTs,  
16  
17 216 deeper ACDs, thinner LTs, deeper VCDs, higher AL/CC ratios, and more myopic  
18  
19  
20 217 refractions (all  $P$  values for trend were less than 0.05) (Table 3). In addition to ACD  
21  
22  
23 218 and LT, the above tendencies were also observed among more obese schoolchildren  
24  
25  
26 219 (students with higher BMIs).

27  
28 220 **Linear regression analysis of the associations between anthropometric indicators**  
29  
30  
31 221 **and both refraction and ocular biometrics**

32  
33  
34 222 In model 1, we used the association between height and refraction as an example and  
35  
36 223 found that for each 10 cm increase in height, the SER was expected to decrease by 0.59  
37  
38  
39 224 D ( $P<0.01$ ) without controlling for any covariates (Table 4). In the next two models,  
40  
41  
42 225 we controlled, in turn, for age and gender or for age, gender, parental myopia, family  
43  
44  
45 226 income, reading and writing distance and time spent outdoors. The difference in SER  
46  
47  
48 227 declined by 0.26 D ( $P<0.01$ ) and 0.21 D ( $P<0.05$ ) in models 2 and 3, respectively. In  
49  
50  
51 228 general, higher heights were associated with longer ALs (+0.14 mm,  $P<0.05$ ), deeper  
52  
53 229 VCDs (+0.13 mm,  $P<0.05$ ), greater AL/CC ratios (+0.02,  $P<0.05$ ), and more negative  
54  
55  
56 230 refractions (-0.21 D,  $P<0.05$ ) among 6- to 15-year-old participants. Nonetheless, weight  
57  
58  
59 231 and BMI were not correlated with refraction in our multiple linear regression models.  
60

1  
2  
3  
4 232 Furthermore, the participants were categorized into the following age groups: 6 to 8  
5  
6  
7 233 years old (n=170), 9 to 11 years old (n=158), and 12 to 15 years old (n=154). After  
8  
9  
10 234 controlling for the above covariates, the age-specific associations were calculated  
11  
12 235 (Table 5). Both height and weight remained independently associated with refraction  
13  
14  
15 236 in the age range from 6 to 8 years old and 9 to 11 years old. Particularly from 9 to 11  
16  
17 237 years old, higher heights in schoolchildren were associated with longer ALs (+0.25 mm,  
18  
19 238  $P<0.01$ ), deeper VCDs (+0.23 mm,  $P<0.01$ ), higher AL/CC ratios (+0.04,  $P<0.01$ ), and  
20  
21  
22 239 more negative refractions (-0.48 D,  $P<0.01$ ) in their eyes. Heavier weights were also  
23  
24  
25 240 associated with longer ALs (+0.29 mm,  $P<0.01$ ), deeper VCDs (+0.29 mm,  $P<0.01$ ),  
26  
27 241 higher AL/CC ratios (+0.04,  $P<0.01$ ), and more negative refractions (-0.48 D,  $P<0.01$ ).  
28  
29  
30 242 However, from 12 to 15 years of age, no association was detected between body stature  
31  
32  
33 243 and refraction.  
34  
35  
36 244

## 39 245 **DISCUSSION**

41  
42 246 In this paper, we comprehensively measured ocular biometrics and then explored the  
43  
44 247 overall and age-specific associations between anthropometric indicators and both  
45  
46  
47 248 refraction and ocular biometrics after adequately controlling for covariates among 6- to  
48  
49  
50 249 15-year-old schoolchildren. In China, few studies such as this one have been conducted.  
51  
52  
53 250 Wang et al.<sup>14</sup> confirmed a positive association between height and AL in 7- to 15-year-  
54  
55  
56 251 old schoolchildren based on longitudinal data obtained in Guangzhou, China. However,  
57  
58  
59 252 detailed information about the associations between body stature and refraction and  
60

1  
2  
3  
4 253 other ocular biometrics was not available in that study. Therefore, compared with  
5  
6  
7 254 previous studies,<sup>14 28</sup> the present study achieved a more detailed analysis.

8  
9 255 The current results are in almost complete agreement with those of Saw et al.<sup>17</sup> who  
10  
11  
12 256 showed that among 1449 Singaporean Chinese children aged 7-9 years old, taller  
13  
14  
15 257 individuals were more likely to have eyes with longer ALs (+0.46 mm,  $P<0.01$ ), deeper  
16  
17  
18 258 VCDs (+0.46 mm,  $P<0.01$ ), flatter corneas (+0.10 mm,  $P<0.01$ ), greater AL/CC ratios  
19  
20  
21 259 (+0.02,  $P=0.03$ ), and refractions that trended toward myopia (-0.47 D,  $P<0.01$ ) after  
22  
23 260 controlling for age, gender, parental myopia, and the number of books read per week.

24  
25  
26 261 A birth cohort performed in Britain to examine the relationship between height growth  
27  
28  
29 262 trajectories and the development of myopia presented similar results.<sup>10</sup> For each SD  
30  
31  
32 263 increase in height for children aged from 2.5 to 10 years old, SER became more  
33  
34  
35 264 negative by -0.075 D (95% CI, -0.112 to -0.039;  $P<0.01$ ) and -0.081 D (95% CI, -0.129  
36  
37  
38 265 to -0.034;  $P<0.01$ ) when the children reached 11 and 15 years old, respectively.  
39  
40  
41 266 However, Huang et al.<sup>28</sup> reported that no significant correlation between myopia shift  
42  
43  
44 267 and height changes among schoolchildren aged 7 to 9 years old in Taiwan, China.

45 268 Although the association remains unclear, these results will help us to further explore  
46  
47  
48 269 the intricate relationship between the development of physical characteristics and  
49  
50  
51 270 refraction. A commonly proposed explanation for this potential association is that both  
52  
53  
54 271 higher height and myopia are independent consequences of better socioeconomic status;  
55  
56  
57 272 therefore, there may be no causal relationship between height and myopia.<sup>17 23</sup> However,  
58  
59  
60 273 in this study, after we controlled for socioeconomic characteristics and myopia-related

1  
2  
3  
4 274 risk factors, height remained independently related to refraction and various ocular  
5  
6  
7 275 biometrics. Myopia most commonly develops during the period from childhood to early  
8  
9  
10 276 adolescence (from approximately 8 to 14 years old),<sup>30</sup> and growth spurts also occur in  
11  
12 277 this period.<sup>31</sup> Therefore, we inferred that the development of refraction could be related  
13  
14  
15 278 to physical development during the early period of adolescent growth. The findings of  
16  
17  
18 279 the Singapore Cohort Study of Risk Factors for Myopia (SCORM) support this  
19  
20  
21 280 hypothesis.<sup>19</sup> SCORM reported that boys and girls who experienced earlier peak height  
22  
23  
24 281 velocity also achieved earlier peak SER velocity (at a mean age of 10.1 vs 10.6 years  
25  
26  
27 282 old for boys,  $P=0.01$ , and 10.0 vs 10.6 years old for girls,  $P=0.01$ ) and had an earlier  
28  
29  
30 283 age of onset of myopia (9.9 vs 10.4 years old for boys,  $P=0.03$ , and 9.7 vs 10.1 years  
31  
32  
33 284 old for girls,  $P=0.04$ ). The exact biologic pathways underlying these associations are  
34  
35  
36 285 currently unknown. Some major systemic hormones, such as growth hormone, thymic  
37  
38  
39 286 hormone and insulin-like growth factors (IGFs), reportedly could regulate longitudinal  
40  
41  
42 287 bone growth during childhood, which are also involved in the development of  
43  
44  
45 288 experimental myopia.<sup>32 33</sup> In addition, epidemiological studies reported that children  
46  
47  
48 289 with growth hormone deficiency have shorter body stature and ALs than usual.<sup>34</sup>  
49  
50  
51 290 Growth hormone supplementation in these children could partially bring the stature and  
52  
53  
54 291 ALs back within the normal range.<sup>35</sup> Sex hormones may be another significant mediator  
55  
56  
57 292 during puberty,<sup>36</sup> but our age-specific results (no association was detected in 12- to 15-  
58  
59  
60 293 year-old participants) may not support this idea. Although these hormones were not  
294 determined in this cross-sectional study, we believe that the shared mechanism between

1  
2  
3  
4 295 height and refraction may shed new light on the etiology of myopia and the efforts to  
5  
6  
7 296 explore the effect of endocrine traits observed during childhood and adolescence on  
8  
9  
10 297 body and eye size in the future studies.

11  
12 298 The relationships weight and BMI share with refraction are not as extensively studied  
13  
14  
15 299 as those with height, but the findings regarding these relationships are also inconclusive.  
16  
17  
18 300 Heavier and more obese Chinese children and adults in Singapore have refractions that  
19  
20  
21 301 trend toward hyperopia.<sup>17 23</sup> Moreover, heavier adults in rural Myanmar reportedly have  
22  
23  
24 302 more positive refractions.<sup>25</sup> However, a cross-sectional study performed in 19-year-old  
25  
26  
27 303 male conscripts in South Korea found that weight and BMI had no effect on refraction.<sup>27</sup>  
28  
29  
30 304 Consistent with the results of a twin study performed in Australia,<sup>22</sup> in our study,  
31  
32  
33 305 heavier weights were associated with more negative refractions among participants  
34  
35  
36 306 aged 6 to 8 and 9 to 11 years old.

37 307 This study has several limitations that warrant consideration. First, information on  
38  
39  
40 308 putative myopia risk factors obtained from our questionnaire (e.g., the distance between  
41  
42  
43 309 the child's eyes and a book when reading or writing) was subjectively estimated by the  
44  
45  
46 310 parents. Although this method has been widely applied in previous studies,<sup>17 28</sup> it can  
47  
48  
49 311 lead to recall bias. Second, the representativeness of the participants in this study may  
50  
51  
52 312 be affected to some extent because the participants were volunteers. Although there  
53  
54  
55 313 were no significant differences in nearly all basic characteristics between participants  
56  
57  
58 314 and those excluded, individuals who were included were older, which may have  
59  
60 315 resulted in overestimation of the prevalence of myopia in our study. Third, all of the



1  
2  
3  
4 316 data collected in this study were cross-sectional in nature and do not allow an evaluation  
5  
6  
7 317 of causality. Therefore, whether the conclusions drawn from this study are applicable  
8  
9  
10 318 to longitudinal relationships remains uncertain. Despite these limitations, we believe  
11  
12 319 that our study provides a valuable reference regarding the associations between  
13  
14  
15 320 anthropometric indicators and both refraction and ocular biometrics in Chinese  
16  
17  
18 321 schoolchildren aged 6 to 15 years old.

19  
20 322 In conclusion, both higher heights and heavier weights were associated with longer  
21  
22  
23 323 ALs, deeper VCDs, higher AL/CC ratios and more myopic refractions during the early  
24  
25  
26 324 period of adolescent growth after controlling for age, gender, parental myopia,  
27  
28  
29 325 family income, reading and writing distance, and time spent outdoors. The results of  
30  
31  
32 326 this study support the idea that a shared mechanism may regulate the coordinated  
33  
34  
35 327 growth of body and eye size in children.

36  
37 328  
38  
39 329 **Acknowledgments** The authors thank all families who participated in our study,  
40  
41  
42 330 Tianjin Eye Hospital for their help with ocular examinations, and all team members in  
43  
44  
45 331 the Department of Maternal, Child and Adolescent Health at the School of Public  
46  
47  
48 332 Health of Tianjin Medical University.

49  
50 333 **Contributors** Design of the study: SL and XZ. Collection and management of the data:  
51  
52  
53 334 SY, SL, WL and QW. Analysis and interpretation of the data: SY. Review and approval  
54  
55  
56 335 of the manuscript: SY, SL, WL, QW, WX and XZ.

57  
58 336 **Funding** This study was supported by grants from the Key Scientific Project of Tianjin  
59  
60

1  
2  
3  
4 337 Science and Technology Commission of China (15ZCZDSY01050) and the National  
5  
6  
7 338 Natural Science Foundation of China (No. 81773459).

8  
9 339 **Competing interests** None declared.

10  
11  
12 340 **Patient consent** Obtained.

13  
14  
15 341 **Ethics approval** Ethics Committee of Tianjin Medical University, China.

16  
17 342 **Provenance and peer review** Not commissioned; externally peer reviewed.

18  
19  
20 343 **Data sharing statement** No additional data are available.

21  
22  
23 344

24  
25 345 **REFERENCES**

26  
27  
28 346 1. Morgan IG, French AN, Ashby RS, et al. The epidemics of myopia: Aetiology and  
29  
30  
31 347 prevention. *Prog Retin Eye Res* 2018;62:134-49.

32  
33  
34 348 2. Kim MH, Zhao D, Kim W, et al. Heritability of myopia and ocular biometrics in  
35  
36  
37 349 Koreans: the healthy twin study. *Investigative ophthalmology & visual science*  
38  
39 350 2013;54(5):3644-9.

40  
41  
42 351 3. Ma Y, Zou H, Lin S, et al. Cohort study with 4-year follow-up of myopia and  
43  
44  
45 352 refractive parameters in primary schoolchildren in Baoshan District, Shanghai. *Clin*  
46  
47 353 *Exp Ophthalmol* 2018

48  
49  
50 354 4. Huang HM, Chang DS, Wu PC. The Association between Near Work Activities and  
51  
52  
53 355 Myopia in Children-A Systematic Review and Meta-Analysis. *PloS one*  
54  
55 356 2015;10(10):e0140419.

56  
57  
58 357 5. Wu LJ, Wang YX, You QS, et al. Risk Factors of Myopic Shift among Primary  
59  
60

- 1  
2  
3  
4 358 School Children in Beijing, China: A Prospective Study. *International journal of*  
5  
6  
7 359 *medical sciences* 2015;12(8):633-8.
- 8  
9 360 6. He M, Xiang F, Zeng Y, et al. Effect of Time Spent Outdoors at School on the  
10  
11  
12 361 Development of Myopia Among Children in China: A Randomized Clinical Trial.  
13  
14  
15 362 *Jama* 2015;314(11):1142-8.
- 16  
17 363 7. Xiong S, Sankaridurg P, Naduvilath T, et al. Time spent in outdoor activities in  
18  
19  
20 364 relation to myopia prevention and control: a meta-analysis and systematic review. *Acta*  
21  
22  
23 365 *ophthalmologica* 2017;95(6):551-66.
- 24  
25 366 8. Mirshahi A, Ponto K, Hoehn R, et al. Myopia and level of education: results from  
26  
27  
28 367 the Gutenberg Health Study. *Ophthalmology* 2014;121(10):2047-52.
- 29  
30  
31 368 9. Williams KM, Bertelsen G, Cumberland P, et al. Increasing Prevalence of Myopia  
32  
33  
34 369 in Europe and the Impact of Education. *Ophthalmology* 2015;122(7):1489-97.
- 35  
36 370 10. Northstone K, Guggenheim JA, Howe LD, et al. Body stature growth trajectories  
37  
38  
39 371 during childhood and the development of myopia. *Ophthalmology* 2013;120(5):1064-  
40  
41  
42 372 73.
- 43  
44 373 11. Lee DC, Lee SY, Kim YC. An epidemiological study of the risk factors associated  
45  
46  
47 374 with myopia in young adult men in Korea. *Scientific reports* 2018;8(1):511.
- 48  
49  
50 375 12. Morgan IG, Ohno-Matsui K, Saw S-M. Myopia. *The Lancet* 2012;379(9827):1739-  
51  
52  
53 376 48.
- 54  
55 377 13. Goss DA, Cox VD, Herrin-Lawson GA, et al. Refractive error, axial length, and  
56  
57  
58 378 height as a function of age in young myopes. *Optometry and vision science : official*  
59  
60

- 1  
2  
3  
4 379 *publication of the American Academy of Optometry* 1990;67(5):332-8.  
5  
6  
7 380 14. Wang D, Ding X, Liu B, et al. Longitudinal changes of axial length and height are  
8  
9 381 associated and concomitant in children. *Investigative ophthalmology & visual science*  
10  
11  
12 382 2011;52(11):7949-53.  
13  
14  
15 383 15. Prashar A, Hocking PM, Erichsen JT, et al. Common determinants of body size and  
16  
17 384 eye size in chickens from an advanced intercross line. *Experimental eye research*  
18  
19  
20 385 2009;89(1):42-8.  
21  
22  
23 386 16. Zhang J, Hur YM, Huang W, et al. Shared genetic determinants of axial length and  
24  
25  
26 387 height in children: the Guangzhou twin eye study. *Archives of ophthalmology (Chicago,*  
27  
28 388 *Ill : 1960)* 2011;129(1):63-8.  
29  
30  
31 389 17. Saw SM, Chua WH, Hong CY, et al. Height and its relationship to refraction and  
32  
33  
34 390 biometry parameters in Singapore Chinese children. *Investigative ophthalmology &*  
35  
36 391 *visual science* 2002;43(5):1408-13.  
37  
38  
39 392 18. Rahi JS, Cumberland PM, Peckham CS. Myopia over the lifecourse: prevalence  
40  
41  
42 393 and early life influences in the 1958 British birth cohort. *Ophthalmology*  
43  
44  
45 394 2011;118(5):797-804.  
46  
47  
48 395 19. Yip VC, Pan CW, Lin XY, et al. The relationship between growth spurts and  
49  
50  
51 396 myopia in Singapore children. *Investigative ophthalmology & visual science*  
52  
53 397 2012;53(13):7961-6.  
54  
55  
56 398 20. Rim TH, Kim SH, Lim KH, et al. Body Stature as an Age-Dependent Risk Factor  
57  
58 399 for Myopia in a South Korean Population. *Seminars in ophthalmology* 2017;32(3):326-  
59  
60

- 1  
2  
3  
4 400 36.  
5  
6  
7 401 21. Gardiner PA. Physical growth and the progress of myopia. *Lancet*  
8  
9 402 1955;269(6897):952-3.  
10  
11  
12 403 22. Dirani M, Islam A, Baird PN. Body stature and myopia-The Genes in Myopia  
13  
14 404 (GEM) twin study. *Ophthalmic epidemiology* 2008;15(3):135-9.  
15  
16  
17 405 23. Wong TY, Foster PJ, Johnson GJ, et al. The relationship between ocular dimensions  
18  
19 406 and refraction with adult stature: the Tanjong Pagar Survey. *Investigative*  
20  
21 407 *ophthalmology & visual science* 2001;42(6):1237-42.  
22  
23  
24 408 24. Ojaimi E, Morgan IG, Robaei D, et al. Effect of stature and other anthropometric  
25  
26 409 parameters on eye size and refraction in a population-based study of Australian children.  
27  
28 410 *Investigative ophthalmology & visual science* 2005;46(12):4424-9.  
29  
30  
31 411 25. Wu HM, Gupta A, Newland HS, et al. Association between stature, ocular biometry  
32  
33 412 and refraction in an adult population in rural Myanmar: the Meiktila eye study. *Clin*  
34  
35 413 *Exp Ophthalmol* 2007;35(9):834-39.  
36  
37  
38 414 26. Sharma A, Congdon N, Gao Y, et al. Height, stunting, and refractive error among  
39  
40 415 rural Chinese schoolchildren: the See Well to Learn Well project. *American journal of*  
41  
42 416 *ophthalmology* 2010;149(2):347-53.  
43  
44  
45 417 27. Jung SK, Lee JH, Kakizaki H, et al. Prevalence of myopia and its association with  
46  
47 418 body stature and educational level in 19-year-old male conscripts in seoul, South Korea.  
48  
49 419 *Investigative ophthalmology & visual science* 2012;53(9):5579-83.  
50  
51  
52 420 28. Huang CY, Hou CH, Lin KK, et al. Relationship of lifestyle and body stature growth  
53  
54  
55  
56  
57  
58  
59  
60

- 1  
2  
3  
4 421 with the development of myopia and axial length elongation in Taiwanese elementary  
5  
6 422 school children. *Indian journal of ophthalmology* 2014;62(8):865-9.  
7  
8  
9 423 29. National Student Physique and Health Research Group. The instruction manual of  
10  
11 424 national survey in Physique and health of Chinese schoolchildren (2014) [M]. Beijing:  
12  
13  
14 425 Higher Education Press, 2014: 41-45.  
15  
16  
17 426 30. Baird P, Schäche M, Dirani M. The GENes in Myopia (GEM) study in  
18  
19 427 understanding the aetiology of refractive errors. *Prog Retin Eye Res* 2010;29(6):520-  
20  
21 428 42.  
22  
23  
24  
25 429 31. Limony Y, Koziel S, Friger M. Age of onset of a normally timed pubertal growth  
26  
27 430 spurt affects the final height of children. *Pediatr Res* 2015;78(3):351-5.  
28  
29  
30  
31 431 32. Rada JA, Wiechmann AF. Ocular expression of avian thymic hormone: changes  
32  
33 432 during the recovery from induced myopia. *Molecular vision* 2009;15:778-92.  
34  
35  
36 433 33. Kusakari T, Sato T, Tokoro T. Visual deprivation stimulates the exchange of the  
37  
38 434 fibrous sclera into the cartilaginous sclera in chicks. *Experimental eye research*  
39  
40 435 2001;73(4):533-46.  
41  
42  
43  
44 436 34. Parentin F, Tonini G, Perissutti P. Refractive evaluation in children with growth  
45  
46 437 defect. *Current eye research* 2004;28(1):11-5.  
47  
48  
49 438 35. Parentin F, Perissutti P. Congenital growth hormone deficiency and eye refraction:  
50  
51 439 a longitudinal study. *Ophthalmologica* 2005;219(4):226-31.  
52  
53  
54  
55 440 36. Ogueta SB, Schwartz SD, Yamashita CK, et al. Estrogen receptor in the human eye:  
56  
57 441 influence of gender and age on gene expression. *Investigative ophthalmology & visual*  
58  
59  
60

1  
2  
3  
4 442 *science* 1999;40(9):1906-11.  
5  
6

7 443  
8  
9  
10  
11  
12  
13  
14  
15  
16  
17  
18  
19  
20  
21  
22  
23  
24  
25  
26  
27  
28  
29  
30  
31  
32  
33  
34  
35  
36  
37  
38  
39  
40  
41  
42  
43  
44  
45  
46  
47  
48  
49  
50  
51  
52  
53  
54  
55  
56  
57  
58  
59  
60

For peer review only

**Table 1** Summary of the characteristics of the participants.

|                               | Total          | Myopia         | Nonmyopia      | <i>P</i> Value |
|-------------------------------|----------------|----------------|----------------|----------------|
| Age (years)                   | 9.42 ± 2.09    | 9.88 ± 2.14    | 8.30 ± 1.45    | <0.01          |
| Male                          | 264 (54.77)    | 187 (54.52)    | 77 (55.40)     | 0.86           |
| Female                        | 218 (45.23)    | 156 (45.48)    | 62 (44.60)     | 0.86           |
| Parental myopia*              |                |                |                | <0.01          |
| None                          | 129 (28.48)    | 74 (23.13)     | 55 (41.35)     |                |
| One parent                    | 188 (41.50)    | 134 (41.88)    | 54 (40.60)     |                |
| Both parents                  | 136 (30.02)    | 112 (35.00)    | 24 (18.05)     |                |
| Monthly family income*        |                |                |                | <0.05          |
| <4000 RMB                     | 41 (8.78)      | 27 (8.16)      | 14 (10.29)     |                |
| 4000-8000 RMB                 | 136 (29.12)    | 89 (26.89)     | 47 (34.56)     |                |
| 8000-10,000 RMB               | 133 (28.48)    | 89 (26.89)     | 44 (32.35)     |                |
| 10,000-15,000 RMB             | 91 (19.49)     | 73 (22.05)     | 18 (13.24)     |                |
| ≥15,000 RMB                   | 66 (14.13)     | 53 (16.01)     | 13 (9.56)      |                |
| Reading and writing distance* |                |                |                | <0.05          |
| <10 cm                        | 45 (9.62)      | 36 (10.81)     | 9 (6.67)       |                |
| 10-20 cm                      | 200 (42.74)    | 148 (44.44)    | 52 (38.52)     |                |
| 20-30 cm                      | 166 (35.47)    | 117 (35.14)    | 49 (36.30)     |                |
| ≥30 cm                        | 57 (12.18)     | 32 (9.61)      | 25 (18.52)     |                |
| Time spent outdoors (hours)   | 1.20 ± 0.70    | 1.16 ± 0.70    | 1.31 ± 0.69    | <0.05          |
| Height (cm)                   | 140.79 ± 13.95 | 143.85 ± 14.17 | 133.22 ± 10.01 | <0.01          |
| Weight (kg)                   | 38.29 ± 10.86  | 40.06 ± 11.05  | 33.92 ± 9.01   | <0.01          |
| BMI (kg/m <sup>2</sup> )      | 19.04 ± 3.18   | 19.10 ± 3.14   | 18.89 ± 3.28   | 0.52           |
| SER (D)                       | -1.48 ± 1.82   | -2.20 ± 1.66   | 0.30 ± 0.54    | <0.01          |
| AL (mm)                       | 23.81 ± 1.12   | 24.16 ± 1.07   | 22.95 ± 0.72   | <0.01          |
| CCT (μm)                      | 547.65 ± 32.44 | 548.88 ± 33.32 | 544.63 ± 30.05 | 0.19           |
| ACD (mm)                      | 3.08 ± 0.26    | 3.14 ± 0.25    | 2.94 ± 0.23    | <0.01          |



|             |              |              |              |       |
|-------------|--------------|--------------|--------------|-------|
| LT (mm)     | 3.47 ± 0.20  | 3.43 ± 0.20  | 3.55 ± 0.19  | <0.01 |
| VCD (mm)    | 17.27 ± 1.09 | 17.60 ± 1.05 | 16.46 ± 0.71 | <0.01 |
| CC (mm)     | 7.78 ± 0.26  | 7.78 ± 0.25  | 7.79 ± 0.26  | 0.84  |
| AL/CC ratio | 3.06 ± 0.13  | 3.11 ± 0.13  | 2.95 ± 0.07  | <0.01 |

Data are presented as the means with standard deviation (SD) or as n (%).

\*Numbers of individuals vary due to missing data.

**Table 2** Bivariate correlations of body stature with refraction and ocular biometrics.

|             | Height (cm) | Weight (kg) | BMI (kg/m <sup>2</sup> ) |
|-------------|-------------|-------------|--------------------------|
| SER (D)     | -0.45**     | -0.39**     | -0.11*                   |
| AL (mm)     | 0.50**      | 0.45**      | 0.15*                    |
| CCT (µm)    | 0.17**      | 0.19**      | 0.09*                    |
| ACD (mm)    | 0.29**      | 0.22**      | 0.03                     |
| LT (mm)     | -0.24**     | -0.19**     | -0.04                    |
| VCD (mm)    | 0.49**      | 0.44**      | 0.16**                   |
| CC (mm)     | 0.07        | 0.10*       | 0.08                     |
| AL/CC ratio | 0.49**      | 0.40**      | 0.10*                    |

Data are the Pearson correlation coefficients.

\*:  $P < 0.05$ .

\*\* :  $P < 0.01$ .

**Table 3** Unadjusted mean values of refraction and ocular biometrics by quartiles of height, weight and BMI.

|                                 | Range       | n   | SER (D)                       | AL (mm)          | CCT ( $\mu\text{m}$ ) | ACD (mm)        |
|---------------------------------|-------------|-----|-------------------------------|------------------|-----------------------|-----------------|
| <i>Height (cm)</i>              |             |     |                               |                  |                       |                 |
| 1st quartile                    | 100.0~130.0 | 127 | -0.48 $\pm$ 1.13 <sup>†</sup> | 23.09 $\pm$ 0.78 | 542.11 $\pm$ 30.93    | 2.97 $\pm$ 0.24 |
| 2nd quartile                    | 130.1~140.0 | 136 | -1.08 $\pm$ 1.46              | 23.58 $\pm$ 0.98 | 544.96 $\pm$ 32.69    | 3.05 $\pm$ 0.28 |
| 3rd quartile                    | 140.1~150.7 | 99  | -1.86 $\pm$ 1.80              | 24.15 $\pm$ 1.01 | 550.04 $\pm$ 32.31    | 3.16 $\pm$ 0.23 |
| 4th quartile                    | 150.8~182.5 | 120 | -2.68 $\pm$ 2.06              | 24.56 $\pm$ 1.14 | 554.58 $\pm$ 32.76    | 3.18 $\pm$ 0.22 |
| <i>P</i> for trend <sup>‡</sup> |             |     | <i>P</i> <0.01                | <i>P</i> <0.01   | <i>P</i> <0.05        | <i>P</i> <0.01  |
| <i>Weight (kg)</i>              |             |     |                               |                  |                       |                 |
| 1st quartile                    | 20.0~30.0   | 129 | -0.59 $\pm$ 1.19              | 23.19 $\pm$ 0.80 | 541.27 $\pm$ 32.75    | 3.02 $\pm$ 0.26 |
| 2nd quartile                    | 30.1~36.1   | 112 | -1.12 $\pm$ 1.30              | 23.58 $\pm$ 1.00 | 547.64 $\pm$ 31.34    | 3.04 $\pm$ 0.26 |
| 3rd quartile                    | 36.2~45.0   | 128 | -1.75 $\pm$ 1.92              | 24.02 $\pm$ 1.12 | 544.17 $\pm$ 31.56    | 3.12 $\pm$ 0.24 |
| 4th quartile                    | 45.1~82.3   | 113 | -2.54 $\pm$ 2.14              | 24.52 $\pm$ 1.12 | 558.92 $\pm$ 31.65    | 3.16 $\pm$ 0.24 |
| <i>P</i> for trend              |             |     | <i>P</i> <0.01                | <i>P</i> <0.01   | <i>P</i> <0.01        | <i>P</i> <0.01  |
| <i>BMI (kg/m<sup>2</sup>)</i>   |             |     |                               |                  |                       |                 |
| 1st quartile                    | 14.0~16.5   | 121 | -1.19 $\pm$ 1.62              | 23.55 $\pm$ 1.05 | 543.79 $\pm$ 31.55    | 3.09 $\pm$ 0.25 |
| 2nd quartile                    | 16.6~18.4   | 120 | -1.39 $\pm$ 1.69              | 23.80 $\pm$ 1.14 | 545.79 $\pm$ 32.26    | 3.05 $\pm$ 0.28 |

| 3rd quartile                  | 18.5~20.8   | 120 | -1.59 ± 1.88   | 23.90 ± 1.12   | 547.12 ± 32.16 | 3.09 ± 0.25    |
|-------------------------------|-------------|-----|----------------|----------------|----------------|----------------|
| 4th quartile                  | 20.9~30.6   | 121 | -1.74 ± 2.05   | 24.00 ± 1.16   | 533.90 ± 33.26 | 3.11 ± 0.25    |
| <i>P</i> for trend            |             |     | <i>P</i> <0.05 | <i>P</i> <0.01 | <i>P</i> <0.05 | <i>P</i> =0.32 |
|                               | Range       | n   | LT (mm)        | VCD (mm)       | CC (mm)        | AL/CC ratio    |
| <i>Height (cm)</i>            |             |     |                |                |                |                |
| 1st quartile                  | 100.0~130.0 | 127 | 3.55 ± 0.19    | 16.57 ± 0.74   | 7.75 ± 0.25    | 2.98 ± 0.09    |
| 2nd quartile                  | 130.1~140.0 | 136 | 3.48 ± 0.23    | 17.07 ± 0.96   | 7.79 ± 0.27    | 3.03 ± 0.11    |
| 3rd quartile                  | 140.1~150.7 | 99  | 3.42 ± 0.18    | 17.58 ± 0.99   | 7.81 ± 0.26    | 3.09 ± 0.13    |
| 4th quartile                  | 150.8~182.5 | 120 | 3.41 ± 0.19    | 17.97 ± 1.12   | 7.78 ± 0.25    | 3.16 ± 0.14    |
| <i>P</i> for trend            |             |     | <i>P</i> <0.01 | <i>P</i> <0.01 | <i>P</i> =0.36 | <i>P</i> <0.01 |
| <i>Weight (kg)</i>            |             |     |                |                |                |                |
| 1st quartile                  | 20.0~30.0   | 129 | 3.51 ± 0.20    | 16.64 ± 0.77   | 7.75 ± 0.25    | 2.99 ± 0.10    |
| 2nd quartile                  | 30.1~36.1   | 112 | 3.49 ± 0.21    | 17.07 ± 0.97   | 7.78 ± 0.28    | 3.03 ± 0.11    |
| 3rd quartile                  | 36.2~45.0   | 128 | 3.45 ± 0.21    | 17.46 ± 1.10   | 7.80 ± 0.24    | 3.08 ± 0.13    |
| 4th quartile                  | 45.1~82.3   | 113 | 3.40 ± 0.19    | 17.95 ± 1.08   | 7.81 ± 0.25    | 3.14 ± 0.15    |
| <i>P</i> for trend            |             |     | <i>P</i> <0.01 | <i>P</i> <0.01 | <i>P</i> =0.08 | <i>P</i> <0.01 |
| <i>BMI (kg/m<sup>2</sup>)</i> |             |     |                |                |                |                |

1  
2  
3  
4  
5  
6  
7  
8  
9  
10  
11  
12  
13  
14  
15  
16  
17  
18  
19  
20  
21  
22  
23  
24  
25  
26  
27  
28  
29  
30  
31  
32  
33  
34  
35  
36  
37  
38  
39  
40  
41  
42  
43  
44  
45  
46

|                    |           |     |                |                |                |                |
|--------------------|-----------|-----|----------------|----------------|----------------|----------------|
| 1st quartile       | 14.0~16.5 | 121 | 3.45 ± 0.18    | 17.01 ± 1.05   | 7.73 ± 0.26    | 3.05 ± 0.12    |
| 2nd quartile       | 16.6~18.4 | 120 | 3.51 ± 0.23    | 17.23 ± 1.04   | 7.81 ± 0.26    | 3.05 ± 0.13    |
| 3rd quartile       | 18.5~20.8 | 120 | 3.46 ± 0.20    | 17.38 ± 1.11   | 7.81 ± 0.26    | 3.06 ± 0.14    |
| 4th quartile       | 20.9~30.6 | 121 | 3.44 ± 0.20    | 17.46 ± 1.13   | 7.79 ± 0.24    | 3.08 ± 0.14    |
| <i>P</i> for trend |           |     | <i>P</i> =0.37 | <i>P</i> <0.01 | <i>P</i> =0.19 | <i>P</i> <0.05 |

†Data are expressed as means ± SD.

‡Tests for linear trend is performed by entering the median value of each category of the anthropometric indicator as a continuous variable in the models.

**Table 4** Multiple linear regression models of refraction and ocular biometry by height, weight, and BMI.

|                           | <b>Model 1</b>        | <b><i>P</i> Value</b> | <b>Model 2</b>       | <b><i>P</i> Value</b> | <b>Model 3</b>       | <b><i>P</i> Value</b> |
|---------------------------|-----------------------|-----------------------|----------------------|-----------------------|----------------------|-----------------------|
| <i>Height (per 10 cm)</i> |                       |                       |                      |                       |                      |                       |
| SER (D)                   | -0.59 (-0.70, -0.49)† | <0.01                 | -0.26 (-0.45, -0.08) | <0.01                 | -0.21 (-0.40, -0.01) | <0.05                 |
| AL (mm)                   | 0.40 (0.34, 0.47)     | <0.01                 | 0.18 (0.07, 0.29)    | <0.01                 | 0.14 (0.03, 0.26)    | <0.05                 |
| CCT (µm)                  | 4.03 (1.97, 6.08)     | <0.01                 | 2.43 (-1.29, 6.16)   | 0.20                  | 3.41 (-0.76, 7.58)   | 0.11                  |
| ACD (mm)                  | 0.05 (0.04, 0.07)     | <0.01                 | 0.02 (-0.01, 0.05)   | 0.17                  | 0.02 (-0.02, 0.05)   | 0.34                  |

|    |                                      |                      |       |                      |       |                     |       |
|----|--------------------------------------|----------------------|-------|----------------------|-------|---------------------|-------|
| 1  |                                      |                      |       |                      |       |                     |       |
| 2  |                                      |                      |       |                      |       |                     |       |
| 3  |                                      |                      |       |                      |       |                     |       |
| 4  |                                      |                      |       |                      |       |                     |       |
| 5  | LT (mm)                              | -0.04 (-0.05, -0.02) | <0.01 | -0.01 (-0.03, 0.02)  | 0.57  | -0.01 (-0.03, 0.02) | 0.75  |
| 6  |                                      |                      |       |                      |       |                     |       |
| 7  | VCD (mm)                             | 0.38 (0.32, 0.44)    | <0.01 | 0.17 (0.06, 0.27)    | <0.01 | 0.13 (0.02, 0.25)   | <0.05 |
| 8  |                                      |                      |       |                      |       |                     |       |
| 9  | CC (mm)                              | 0.01 (-0.01, 0.03)   | 0.13  | 0.01 (-0.02, 0.04)   | 0.41  | 0.01 (-0.03, 0.04)  | 0.81  |
| 10 |                                      |                      |       |                      |       |                     |       |
| 11 | AL/CC ratio                          | 0.05 (0.04, 0.06)    | <0.01 | 0.02 (0.01, 0.03)    | <0.01 | 0.02 (0.01, 0.03)   | <0.05 |
| 12 |                                      |                      |       |                      |       |                     |       |
| 13 | <i>Weight (per 10 kg)</i>            |                      |       |                      |       |                     |       |
| 14 |                                      |                      |       |                      |       |                     |       |
| 15 | SER (D)                              | -0.65 (-0.79, -0.51) | <0.01 | -0.21 (-0.39, -0.03) | <0.05 | -0.18 (-0.36, 0.01) | 0.07  |
| 16 |                                      |                      |       |                      |       |                     |       |
| 17 | AL (mm)                              | 0.46 (0.38, 0.55)    | <0.01 | 0.16 (0.05, 0.26)    | <0.01 | 0.15 (0.04, 0.26)   | <0.01 |
| 18 |                                      |                      |       |                      |       |                     |       |
| 19 | CCT ( $\mu\text{m}$ )                | 5.56 (2.93, 8.20)    | <0.01 | 3.68 (0.06, 7.29)    | <0.05 | 4.44 (0.42, 8.47)   | <0.05 |
| 20 |                                      |                      |       |                      |       |                     |       |
| 21 | ACD (mm)                             | 0.05 (0.03, 0.07)    | <0.01 | -0.01 (-0.03, 0.02)  | 0.90  | -0.01 (-0.03, 0.03) | 0.87  |
| 22 |                                      |                      |       |                      |       |                     |       |
| 23 | LT (mm)                              | -0.04 (-0.05, -0.02) | <0.01 | 0.01 (-0.02, 0.02)   | 0.95  | 0.01 (-0.02, 0.03)  | 0.96  |
| 24 |                                      |                      |       |                      |       |                     |       |
| 25 | VCD (mm)                             | 0.44 (0.36, 0.53)    | <0.01 | 0.16 (0.06, 0.27)    | <0.01 | 0.15 (0.04, 0.26)   | <0.01 |
| 26 |                                      |                      |       |                      |       |                     |       |
| 27 | CC (mm)                              | 0.03 (0.01, 0.05)    | <0.05 | 0.02 (-0.01, 0.05)   | 0.11  | 0.02 (-0.01, 0.05)  | 0.14  |
| 28 |                                      |                      |       |                      |       |                     |       |
| 29 | AL/CC ratio                          | 0.05 (0.04, 0.06)    | <0.01 | 0.01 (-0.01, 0.02)   | 0.10  | 0.01 (-0.01, 0.02)  | 0.16  |
| 30 |                                      |                      |       |                      |       |                     |       |
| 31 | <i>BMI (per 10 kg/m<sup>2</sup>)</i> |                      |       |                      |       |                     |       |
| 32 |                                      |                      |       |                      |       |                     |       |
| 33 | SER (D)                              | -0.64 (-1.15, -0.13) | <0.05 | -0.26 (-0.73, 0.20)  | 0.26  | -0.27 (-0.74, 0.20) | 0.25  |
| 34 |                                      |                      |       |                      |       |                     |       |
| 35 | AL (mm)                              | 0.53 (0.21, 0.84)    | <0.01 | 0.20 (-0.07, 0.47)   | 0.15  | 0.23 (-0.05, 0.50)  | 0.10  |
| 36 |                                      |                      |       |                      |       |                     |       |
| 37 | CCT ( $\mu\text{m}$ )                | 9.50 (0.35, 18.65)   | <0.05 | 6.37 (-2.79, 15.53)  | 0.17  | 7.19 (-2.87, 17.25) | 0.16  |
| 38 |                                      |                      |       |                      |       |                     |       |
| 39 |                                      |                      |       |                      |       |                     |       |
| 40 |                                      |                      |       |                      |       |                     |       |
| 41 |                                      |                      |       |                      |       |                     |       |
| 42 |                                      |                      |       |                      |       |                     |       |
| 43 |                                      |                      |       |                      |       |                     |       |
| 44 |                                      |                      |       |                      |       |                     |       |
| 45 |                                      |                      |       |                      |       |                     |       |
| 46 |                                      |                      |       |                      |       |                     |       |

1  
2  
3  
4  
5  
6  
7  
8  
9  
10  
11  
12  
13  
14  
15  
16  
17  
18  
19  
20  
21  
22  
23  
24  
25  
26  
27  
28  
29  
30  
31  
32  
33  
34  
35  
36  
37  
38  
39  
40  
41  
42  
43  
44  
45  
46

|             |                     |       |                     |      |                     |      |
|-------------|---------------------|-------|---------------------|------|---------------------|------|
| ACD (mm)    | 0.03 (-0.05, 0.10)  | 0.50  | -0.03 (-0.10, 0.04) | 0.46 | -0.02 (-0.10, 0.05) | 0.52 |
| LT (mm)     | -0.02 (-0.08, 0.03) | 0.42  | 0.01 (-0.05, 0.07)  | 0.79 | 0.01 (-0.06, 0.07)  | 0.86 |
| VCD (mm)    | 0.55 (0.24, 0.85)   | <0.01 | 0.23 (-0.03, 0.50)  | 0.09 | 0.25 (-0.03, 0.52)  | 0.08 |
| CC (mm)     | 0.06 (-0.01, 0.14)  | 0.09  | 0.04 (-0.03, 0.11)  | 0.25 | 0.06 (-0.02, 0.14)  | 0.13 |
| AL/CC ratio | 0.04 (0.01, 0.08)   | <0.05 | 0.01 (-0.02, 0.04)  | 0.58 | 0.01 (-0.03, 0.04)  | 0.67 |

†Each value represents a separate regression model, with height, weight, or BMI used as the independent variable, the refraction or individual ocular biometrics used as the dependent variable, either alone or with various confounders. Data in parentheses represents the 95% confidence interval.

Model 1 constructs based on crude data. In the next two models, we controlled, in turn, for age and gender or for age, gender, parental myopia, family income, reading and writing distance, and time spent outdoors.

**Table 5** Age-specific results of the associations of anthropometric indicators with both refraction and ocular biometrics.

|                           | 6-8 years old (n=170) | 9-11 years old (n=158) | 12-15 years old (n=154) |
|---------------------------|-----------------------|------------------------|-------------------------|
|                           | <i>b</i>              | <i>b</i>               | <i>b</i>                |
| <i>Height (per 10 cm)</i> |                       |                        |                         |
| SER (D)                   | -0.31 (-0.59, -0.03)* | -0.48 (-0.71, -0.24)** | 0.35 (-0.52, 1.22)      |

|                                      |                       |                        |                      |
|--------------------------------------|-----------------------|------------------------|----------------------|
| AL (mm)                              | 0.17 (-0.02, 0.35)    | 0.25 (0.11, 0.38)**    | -0.25 (-0.69, 0.18)  |
| CCT ( $\mu\text{m}$ )                | 2.01 (-5.59, 9.60)    | 0.77 (-3.82, 5.36)     | 10.49 (-5.41, 26.39) |
| ACD (mm)                             | 0.04 (-0.02, 0.10)    | 0.03 (-0.01, 0.06)     | -0.09 (-0.17, -0.01) |
| LT (mm)                              | -0.03 (-0.08, 0.02)   | -0.01 (-0.04, 0.01)    | 0.07 (-0.02, 0.15)   |
| VCD (mm)                             | 0.18 (-0.004, 0.36)   | 0.23 (0.09, 0.36)**    | -0.23 (-0.69, 0.23)  |
| CC (mm)                              | -0.01 (-0.07, 0.05)   | -0.01 (-0.05, 0.03)    | 0.01 (-0.09, 0.12)   |
| AL/CC                                | 0.03 (0.003, 0.05)*   | 0.04 (0.02, 0.05)**    | -0.04 (-0.09, 0.02)  |
| <i>Weight (per 10 kg)</i>            |                       |                        |                      |
| SER (D)                              | -0.37 (-0.67, -0.07)* | -0.48 (-0.74, -0.23)** | 0.39 (-0.23, 1.01)   |
| AL (mm)                              | 0.13 (-0.08, 0.33)    | 0.29 (0.15, 0.44)**    | -0.09 (-0.41, 0.22)  |
| CCT ( $\mu\text{m}$ )                | 1.43 (-6.93, 9.79)    | 3.00 (-1.99, 7.99)     | 10.83 (-0.38, 22.04) |
| ACD (mm)                             | -0.002 (-0.06, 0.06)  | 0.03 (-0.01, 0.07)     | -0.06 (-0.11, 0.002) |
| LT (mm)                              | 0.02 (-0.03, 0.08)    | -0.03 (-0.06, 0.001)   | 0.02 (-0.05, 0.08)   |
| VCD (mm)                             | 0.11 (-0.09, 0.31)    | 0.29 (0.14, 0.44)**    | -0.06 (-0.39, 0.28)  |
| CC (mm)                              | 0.02 (-0.05, 0.08)    | 0.003 (-0.04, 0.04)    | 0.04 (-0.04, 0.11)   |
| AL/CC                                | 0.01 (-0.01, 0.04)    | 0.04 (0.02, 0.06)**    | -0.03 (-0.07, 0.01)  |
| <i>BMI (per 10 kg/m<sup>2</sup>)</i> |                       |                        |                      |

1  
2  
3  
4  
5  
6  
7  
8  
9  
10  
11  
12  
13  
14  
15  
16  
17  
18  
19  
20  
21  
22  
23  
24  
25  
26  
27  
28  
29  
30  
31  
32  
33  
34  
35  
36  
37  
38  
39  
40  
41  
42  
43  
44  
45  
46

|          |                      |                     |                      |
|----------|----------------------|---------------------|----------------------|
| SER (D)  | -0.46 (-1.10, 0.17)  | -0.63 (-1.38, 0.13) | 0.96 (-1.02, 2.93)   |
| AL (mm)  | 0.06 (-0.36, 0.48)   | 0.47 (0.05, 0.90)*  | 0.03 (-0.98, 1.03)   |
| CCT (µm) | 0.84 (-16.31, 17.99) | 9.14 (-5.10, 23.37) | 28.47 (-7.47, 64.41) |
| ACD (mm) | -0.07 (-0.19, 0.06)  | 0.04 (-0.07, 0.15)  | -0.10 (-0.28, 0.09)  |
| LT (mm)  | 0.10 (-0.01, 0.21)   | -0.07 (-0.16, 0.01) | -0.03 (-0.23, 0.17)  |
| VCD (mm) | 0.01 (-0.40, 0.43)   | 0.51 (0.08, 0.93)*  | 0.15 (-0.91, 1.21)   |
| CC (mm)  | 0.05 (-0.09, 0.19)   | 0.03 (-0.08, 0.14)  | 0.13 (-0.11, 0.37)   |
| AL/CC    | -0.01 (-0.06, 0.04)  | 0.05 (-0.003, 0.11) | -0.05 (-0.17, 0.08)  |

\* $P < 0.05$ ; \*\* $P < 0.01$ .

Each value represents a separate regression model with height, weight, or BMI used as the independent variable and the refraction or individual ocular biometrics used as the dependent variable. We controlled for gender, parental myopia, family income, reading and writing distance, and time spent outdoors. Data in parentheses represents the 95% confidence interval.



1  
2  
3  
4  
5  
6  
7  
8  
9  
10  
11  
12  
13  
14  
15  
16  
17  
18  
19  
20  
21  
22  
23  
24  
25  
26  
27  
28  
29  
30  
31  
32  
33  
34  
35  
36  
37  
38  
39  
40  
41  
42  
43  
44  
45  
46  
47  
48  
49  
50  
51  
52  
53  
54  
55  
56  
57  
58  
59  
60

For peer review only

**Supplementary Table 1** Specific classification of some items in the questionnaire.

|                                                                                    |                                                                                                                    |
|------------------------------------------------------------------------------------|--------------------------------------------------------------------------------------------------------------------|
| What day is your child's birthday?                                                 | _____ (yy/mm/dd)                                                                                                   |
| What's your child's gender?                                                        | A. Male    B. Female                                                                                               |
| What is the average monthly income of your family?                                 | A. Less than 4000 RMB<br>B. 4000-8000 RMB<br>C. 8000-10,000 RMB<br>D. 10,000-15,000 RMB<br>E. More than 15,000 RMB |
| Does the child's mother wear glasses for myopia?                                   | A. Yes    B. No                                                                                                    |
| Does the child's father wear glasses for myopia?                                   | A. Yes    B. No                                                                                                    |
| What is the distance between your child's eyes and a book when reading or writing? | A. <10 cm    B. 10-19 cm<br>C. 20-29 cm    D. ≥30 cm                                                               |
| How many hours per day dose the child spend on outdoor activities during weekdays? | _____ hours _____ minutes                                                                                          |
| How many hours per day dose the child spend on outdoor activities during weekends? | _____ hours _____ minutes                                                                                          |

**STROBE 2007 (v4) Statement—Checklist of items that should be included in reports of *cross-sectional studies***

| Section/Topic                | Item # | Recommendation                                                                                                                                                                       | Reported on page # |
|------------------------------|--------|--------------------------------------------------------------------------------------------------------------------------------------------------------------------------------------|--------------------|
| <b>Title and abstract</b>    | 1      | (a) Indicate the study's design with a commonly used term in the title or the abstract                                                                                               | Page 2             |
|                              |        | (b) Provide in the abstract an informative and balanced summary of what was done and what was found                                                                                  | Page 2-3           |
| <b>Introduction</b>          |        |                                                                                                                                                                                      |                    |
| Background/rationale         | 2      | Explain the scientific background and rationale for the investigation being reported                                                                                                 | Page 4-5           |
| Objectives                   | 3      | State specific objectives, including any prespecified hypotheses                                                                                                                     | Page 5             |
| <b>Methods</b>               |        |                                                                                                                                                                                      |                    |
| Study design                 | 4      | Present key elements of study design early in the paper                                                                                                                              | Page 6             |
| Setting                      | 5      | Describe the setting, locations, and relevant dates, including periods of recruitment, exposure, follow-up, and data collection                                                      | Page 6             |
| Participants                 | 6      | (a) Give the eligibility criteria, and the sources and methods of selection of participants                                                                                          | Page 6             |
| Variables                    | 7      | Clearly define all outcomes, exposures, predictors, potential confounders, and effect modifiers. Give diagnostic criteria, if applicable                                             | Page 7-8           |
| Data sources/<br>measurement | 8*     | For each variable of interest, give sources of data and details of methods of assessment (measurement). Describe comparability of assessment methods if there is more than one group | Page 7-8           |
| Bias                         | 9      | Describe any efforts to address potential sources of bias                                                                                                                            | Page 6-9           |
| Study size                   | 10     | Explain how the study size was arrived at                                                                                                                                            | Page 10            |
| Quantitative variables       | 11     | Explain how quantitative variables were handled in the analyses. If applicable, describe which groupings were chosen and why                                                         | Page 8-9           |
| Statistical methods          | 12     | (a) Describe all statistical methods, including those used to control for confounding                                                                                                | Page 8-9           |
|                              |        | (b) Describe any methods used to examine subgroups and interactions                                                                                                                  | --                 |
|                              |        | (c) Explain how missing data were addressed                                                                                                                                          | --                 |
|                              |        | (d) If applicable, describe analytical methods taking account of sampling strategy                                                                                                   | --                 |
|                              |        | (e) Describe any sensitivity analyses                                                                                                                                                | --                 |
| <b>Results</b>               |        |                                                                                                                                                                                      |                    |

|                          |     |                                                                                                                                                                                                              |            |
|--------------------------|-----|--------------------------------------------------------------------------------------------------------------------------------------------------------------------------------------------------------------|------------|
| Participants             | 13* | (a) Report numbers of individuals at each stage of study—eg numbers potentially eligible, examined for eligibility, confirmed eligible, included in the study, completing follow-up, and analysed            | Page 10    |
|                          |     | (b) Give reasons for non-participation at each stage                                                                                                                                                         | Page 10    |
|                          |     | (c) Consider use of a flow diagram                                                                                                                                                                           | --         |
| Descriptive data         | 14* | (a) Give characteristics of study participants (eg demographic, clinical, social) and information on exposures and potential confounders                                                                     | Page 10    |
|                          |     | (b) Indicate number of participants with missing data for each variable of interest                                                                                                                          | Page 10    |
| Outcome data             | 15* | Report numbers of outcome events or summary measures                                                                                                                                                         | Page 10    |
| Main results             | 16  | (a) Give unadjusted estimates and, if applicable, confounder-adjusted estimates and their precision (eg, 95% confidence interval). Make clear which confounders were adjusted for and why they were included | Page 10-12 |
|                          |     | (b) Report category boundaries when continuous variables were categorized                                                                                                                                    | Page 9     |
|                          |     | (c) If relevant, consider translating estimates of relative risk into absolute risk for a meaningful time period                                                                                             | --         |
| Other analyses           | 17  | Report other analyses done—eg analyses of subgroups and interactions, and sensitivity analyses                                                                                                               | --         |
| <b>Discussion</b>        |     |                                                                                                                                                                                                              |            |
| Key results              | 18  | Summarise key results with reference to study objectives                                                                                                                                                     | Page 12    |
| Limitations              | 19  | Discuss limitations of the study, taking into account sources of potential bias or imprecision. Discuss both direction and magnitude of any potential bias                                                   | Page 15    |
| Interpretation           | 20  | Give a cautious overall interpretation of results considering objectives, limitations, multiplicity of analyses, results from similar studies, and other relevant evidence                                   | Page 13-15 |
| Generalisability         | 21  | Discuss the generalisability (external validity) of the study results                                                                                                                                        | Page 15    |
| <b>Other information</b> |     |                                                                                                                                                                                                              |            |
| Funding                  | 22  | Give the source of funding and the role of the funders for the present study and, if applicable, for the original study on which the present article is based                                                | Page 16    |

\*Give information separately for cases and controls in case-control studies and, if applicable, for exposed and unexposed groups in cohort and cross-sectional studies.

**Note:** An Explanation and Elaboration article discusses each checklist item and gives methodological background and published examples of transparent reporting. The STROBE checklist is best used in conjunction with this article (freely available on the Web sites of PLoS Medicine at <http://www.plosmedicine.org/>, Annals of Internal Medicine at <http://www.annals.org/>, and Epidemiology at <http://www.epidem.com/>). Information on the STROBE Initiative is available at [www.strobe-statement.org](http://www.strobe-statement.org).

# BMJ Open

## Associations between anthropometric indicators and both refraction and ocular biometrics in a cross-sectional study of Chinese schoolchildren

|                                 |                                                                                                                                                                                                                                                                                                                                                                                                                 |
|---------------------------------|-----------------------------------------------------------------------------------------------------------------------------------------------------------------------------------------------------------------------------------------------------------------------------------------------------------------------------------------------------------------------------------------------------------------|
| Journal:                        | <i>BMJ Open</i>                                                                                                                                                                                                                                                                                                                                                                                                 |
| Manuscript ID                   | bmjopen-2018-027212.R2                                                                                                                                                                                                                                                                                                                                                                                          |
| Article Type:                   | Research                                                                                                                                                                                                                                                                                                                                                                                                        |
| Date Submitted by the Author:   | 26-Mar-2019                                                                                                                                                                                                                                                                                                                                                                                                     |
| Complete List of Authors:       | Ye, Sheng; School of Public Health, Tianjin Medical University<br>Liu, Shengxin; School of Public Health, Tianjin Medical University<br>Li, Wenlei; School of Public Health, Tianjin Medical University<br>Wang, Qifan; School of Public Health, Tianjin Medical University<br>Xi, Wei; School of Public Health, Tianjin Medical University<br>Zhang , Xin; School of Public Health, Tianjin Medical University |
| <b>Primary Subject Heading</b>: | Public health                                                                                                                                                                                                                                                                                                                                                                                                   |
| Secondary Subject Heading:      | Ophthalmology, Epidemiology                                                                                                                                                                                                                                                                                                                                                                                     |
| Keywords:                       | anthropometric indicators, refraction, ocular biometrics, schoolchildren                                                                                                                                                                                                                                                                                                                                        |
|                                 |                                                                                                                                                                                                                                                                                                                                                                                                                 |

SCHOLARONE™  
Manuscripts

1  
2  
3  
4 1 **Associations between anthropometric indicators and both refraction**  
5  
6  
7 2 **and ocular biometrics in a cross-sectional study of Chinese**  
8  
9 3 **schoolchildren**

10  
11  
12 4  
13  
14  
15 5 **Sheng Ye<sup>1</sup>, Shengxin Liu<sup>1</sup>, Wenlei Li<sup>1</sup>, Qifan Wang<sup>1</sup>, Wei Xi<sup>1</sup>, and Xin Zhang<sup>1</sup>**  
16  
17  
18 6

19  
20 7 **Author affiliation**

21  
22  
23 8 1. Department of Maternal, Child and Adolescent Health, School of Public Health,  
24  
25 9 Tianjin Medical University, No. 22 Qixiangtai Road, Tianjin 300070, China.

26  
27  
28 10 SY and SL contributed equally to the work presented here and should therefore be  
29  
30  
31 11 regarded as equivalent authors.

32  
33  
34 12  
35  
36 13 **Correspondence to**

37  
38  
39 14 Prof. Xin Zhang; zhangxin@tmu.edu.cn.  
40  
41  
42  
43  
44  
45  
46  
47  
48  
49  
50  
51  
52  
53  
54  
55  
56  
57  
58  
59  
60

1  
2  
3  
4 15 **ABSTRACT**

5  
6  
7 16 **Objective** To identify associations between anthropometric indicators (height, weight,  
8  
9  
10 17 and body mass index (BMI)) and both refraction and ocular biometrics in Chinese  
11  
12 18 schoolchildren in Tianjin, China.

13  
14  
15 19 **Design** Cross-sectional study.

16  
17  
18 20 **Participants** A total of 482 (86.07%) students (6 to 15 years old) with no history of  
19  
20 21 ocular or systemic pathologies were enrolled in this study.

21  
22 22 **Methodology** Height and weight were measured using standardized protocols. Ocular  
23  
24 23 biometrics (axial length (AL), vitreous chamber depth (VCD), and corneal curvature  
25  
26 24 (CC)) were measured by a low-coherence optical reflectometry device. Cycloplegic  
27  
28 25 refraction was measured using autorefraction. The AL/CC ratio and spherical  
29  
30 26 equivalent refraction (SER) were calculated. Myopia was defined as  $SER \leq -0.50$   
31  
32 27 diopters (D). Multiple linear regression analysis was performed to explore the  
33  
34 28 associations between anthropometric indicators (height, weight and BMI) and both  
35  
36 29 refraction and ocular biometrics.

37  
38  
39 30 **Results** The overall prevalence of myopia was 71.16%. Overall, only height was  
40  
41 31 associated with ALs, VCDs, AL/CC ratios, and refractions after controlling for age,  
42  
43 32 gender, parental myopia, family income, reading and writing distance, and time spent  
44  
45 33 outdoors. Furthermore, age-specific results demonstrated that height and weight were  
46  
47 34 independently associated with refraction in 6- to 8-year-old and 9- to 11-year-old  
48  
49 35 participants. Higher heights in schoolchildren were associated with longer ALs  
50  
51  
52  
53  
54  
55  
56  
57  
58  
59  
60

1  
2  
3  
4 36 (regression coefficient  $b=+0.25$  for each 10 cm difference in height,  $P<0.01$ ), deeper  
5  
6  
7 37 VCDs ( $b=+0.23$ ,  $P<0.01$ ), higher AL/CC ratios ( $b=+0.04$ ,  $P<0.01$ ), and more negative  
8  
9  
10 38 refractions ( $b=-0.48$ ,  $P<0.01$ ). Heavier weights were also associated with longer ALs  
11  
12 39 (+0.29 mm,  $P<0.01$ ), deeper VCDs (+0.29 mm,  $P<0.01$ ), higher AL/CC ratios (+0.04,  
13  
14  
15 40  $P<0.01$ ), and more negative refractions (-0.48 D,  $P<0.01$ ).

16  
17 41 **Conclusions** Height and weight remained independently related to refraction and  
18  
19  
20 42 various ocular biometrics during the early adolescent growth period after adequately  
21  
22  
23 43 controlling for covariates, which could support the idea that a shared mechanism may  
24  
25  
26 44 regulate the coordinated growth of body and eye size in children.

27  
28 45 **Keywords:** anthropometric indicators, refraction, ocular biometrics, schoolchildren  
29  
30

31 46

#### 32 33 34 47 **Strengths and limitations of this study**

- 35  
36 48 ● The study participants were schoolchildren ranging in age from 6 to 15 years old,  
37  
38  
39 49 a period when myopia commonly develops, which could allow us to study the  
40  
41  
42 50 association between body stature and refraction during development.
- 43  
44  
45 51 ● The overall and age-specific associations between anthropometric indicators and  
46  
47  
48 52 both refraction and ocular biometrics were calculated in this study to help better  
49  
50  
51 53 clarify the coordinated growth of body and eye size.
- 52  
53 54 ● Ocular biometrics were measured comprehensively, and the covariates were  
54  
55  
55 55 adequately controlled, which allowed us to achieve a more detailed analysis.
- 56  
57  
58 56 ● An evaluation of causality was not possible because this study had a cross-sectional  
59  
60



1  
2  
3  
4 57 design.  
5  
6  
7 58  
8

9 59 **Introduction**  
10

11  
12 60 Myopia has reached almost epidemic proportions in the world, especially in certain  
13  
14 61 areas of East and Southeast Asia.<sup>1</sup> This condition is commonly viewed as etiologically  
15  
16 62 heterogeneous. Genetic and environmental risk factors are involved in its progression.  
17  
18 63 The genetic basis of myopia has been supported by evidence indicating high heritability  
19  
20 64 values in twin studies<sup>2</sup> and a higher prevalence of myopia in children with myopic  
21  
22 65 parents.<sup>3</sup> Excessive near work activities,<sup>4,5</sup> limited time spent outdoors,<sup>6,7</sup> and intensive  
23  
24 66 educational pressure<sup>8,9</sup> reportedly to promote the development of myopia. In our effort  
25  
26 67 to consider other factors, we noted that anthropometric indicators, such as height, are  
27  
28 68 thought to be associated with refraction, although no consensus has been achieved  
29  
30 69 regarding this issue.<sup>10,11</sup>  
31  
32  
33  
34  
35  
36  
37  
38

39 70 Refractive status is determined by the balance of the refractive power of the cornea  
40  
41 71 and lens, and the axial length (AL) of the eye (representing the combination of anterior  
42  
43 72 chamber depth (ACD), lens thickness (LT), and vitreous chamber depth (VCD)).<sup>12</sup>  
44  
45 73 Myopia usually arises in an eye that has become too long, particularly via vitreous  
46  
47 74 chamber elongation. Several epidemiological studies have demonstrated that changes  
48  
49 75 in ocular dimensions that occur in early life progress concomitant with physical  
50  
51 76 development in children,<sup>13,14</sup> and the ages of cessation are also similar for increases in  
52  
53 77 height and axial elongation.<sup>13</sup> Furthermore, genetic studies have confirmed that a  
54  
55  
56  
57  
58  
59  
60

1  
2  
3  
4 78 common genetic pathway underlies both height and AL,<sup>15 16</sup> although no specific  
5  
6  
7 79 genetic variants have yet been identified. All of these clues suggest a shared mechanism  
8  
9  
10 80 that regulates the coordinated growth of body and eye size. It has been suggested that  
11  
12 81 there may be a relationship between body stature and refraction. However, in contrast  
13  
14  
15 82 to the consensus regarding the significant associations between body stature and AL,  
16  
17  
18 83 the relationship between body stature and refraction remains controversial. Although  
19  
20 84 many studies have reported that taller<sup>10 17-20</sup> and heavier persons<sup>21 22</sup> have an increased  
21  
22  
23 85 likelihood of having myopia, other studies have found no such association.<sup>23-28</sup> The  
24  
25  
26 86 discrepancies among these studies may be due to differences in sample sizes, concept  
27  
28  
29 87 definitions or other methodological variations (e.g., height and weight obtained via self-  
30  
31 88 reporting).

32  
33  
34 89 In China, few studies have comprehensively measured ocular biometrics or further  
35  
36  
37 90 explored their associations with body stature. Additionally, myopia most commonly  
38  
39  
40 91 starts in young schoolchildren and progresses in early adolescence.<sup>21</sup> Therefore, it is  
41  
42  
43 92 most appropriate to study the effect of body growth on refractive development in young,  
44  
45  
46 93 growing students. In the current survey, we explored the associations between  
47  
48  
49 94 anthropometric indicators, including height, weight, and BMI, and both refraction and  
50  
51 95 ocular biometrics in schoolchildren aged 6 to 15 years old in Tianjin, China.

52  
53 96

## 54 55 97 **METHODS**

### 56 57 58 98 **Recruitment**

59  
60

1  
2  
3  
4 99 Participants were recruited based on the following strategies. Two districts were  
5  
6  
7 100 randomly chosen from the 6 main urban districts in Tianjin in November 2016. Next,  
8  
9  
10 101 one primary school and one junior high school were randomly selected from each  
11  
12 102 selected district. Then, one class was randomly chosen from each grade level within the  
13  
14  
15 103 two selected schools. All students in these selected classes were invited, but  
16  
17  
18 104 participation in this study was voluntary. After the purposes and procedures of the study  
19  
20  
21 105 were explained to each student and their parents in depth, written informed consent was  
22  
23  
24 106 collected. Students without parental consent and students who had amblyopia,  
25  
26  
27 107 heterotropia, or any ocular or systemic pathologies were excluded.

28  
29 108 The study protocol was approved by the Ethics Committee of Tianjin Medical  
30  
31  
32 109 University and performed in accordance with the tenets of the Declaration of Helsinki.

### 33 34 110 **Ocular examinations**

35  
36  
37 111 All participants underwent a comprehensive eye examination, including measurements  
38  
39  
40 112 of intraocular pressure, a slit-lamp examination of the anterior and posterior segments,  
41  
42  
43 113 cycloplegic autorefraction and ocular biometrics. The purpose of intraocular pressure  
44  
45  
46 114 measurement and slit-lamp examination was to exclude contraindications for mydriasis.

47  
48 115 Ocular biometrics, such as AL, central corneal thickness (CCT), ACD, LT, VCD,  
49  
50  
51 116 and corneal curvature (CC), were measured with a low-coherence optical reflectometry  
52  
53  
54 117 device (Lenstar LS900; Haag-Streit AG, 3098 Koeniz, Switzerland) in both eyes before  
55  
56  
57 118 pupil dilation. In addition, the AL/CC ratio, also commonly known as the axial  
58  
59  
60 119 length/corneal radius (AL/CR) ratio, was calculated. Then, cycloplegia was induced by

1  
2  
3  
4 120 administering one drop containing 0.5% tropicamide and 0.5% phenylephrine in a  
5  
6  
7 121 mixed eye agent to each eye at 0 and 5 minutes. Twenty-five minutes after the second  
8  
9 122 instillation, pupillary dilation and the pupillary light reflex were evaluated. Full  
10  
11  
12 123 cycloplegia was considered when the pupil diameter reached 6 mm or more and the  
13  
14  
15 124 light reflex disappeared. A third drop was administered if full cycloplegia was not  
16  
17  
18 125 achieved. Then, participants with full cycloplegia underwent autorefraction using an  
19  
20  
21 126 auto-kerato-refractor (Canon Autorefractor RK-F1, Tokyo, Japan), and 3 consecutive  
22  
23 127 measurements were taken in both eyes. The mean value of 3 valid measurements was  
24  
25  
26 128 calculated for statistical analysis. All of the above instruments were calibrated before  
27  
28  
29 129 the ocular examination. All examinations were performed by board-certified  
30  
31 130 ophthalmologists and certified optometrists.

### 131 **Definitions**

32  
33  
34  
35  
36 132 The SER of each eye was calculated as the spherical refraction + 1/2 of the cylindrical  
37  
38  
39 133 refraction using data obtained using the autorefractor. Myopia was defined as an SER  
40  
41  
42 134 of  $\leq -0.5$  D.

### 135 **Anthropometric measurements**

43  
44  
45  
46  
47 136 Height and weight were obtained following specific standardized protocols<sup>29</sup> and  
48  
49  
50 137 measured by community doctors on the students' campus. Height was determined with  
51  
52  
53 138 the subject standing barefoot on the base of the height meter and recorded in centimeters  
54  
55  
56 139 (cm). Weight was measured without shoes and heavy coats on a calibrated electronic  
57  
58  
59 140 weighing scale and recorded in kilograms (kg). BMI was calculated as weight/height<sup>2</sup>  
60

1  
2  
3  
4 141 and recorded in kilograms per square meter (kg/m<sup>2</sup>).  
5

6  
7 142 **Questionnaire**  
8

9 143 The parents of participants and those excluded were all asked to complete a  
10  
11  
12 144 questionnaire developed to collect information on social-demographic characteristics  
13  
14  
15 145 and potential risk factors for school myopia (supplementary Table 1).  
16

17 146 The basic characteristics of the participants included age, gender, the monthly  
18  
19  
20 147 income of the family, and the number of parents with myopia. Near-work-related  
21  
22  
23 148 behaviors were ascertained with the question “What is the distance between your child's  
24  
25  
26 149 eyes and a book when reading or writing?”, with answers categorized as follows: <10  
27  
28 150 cm, 10-19 cm, 20-29 cm, and ≥30 cm. Time spent outdoors was estimated by asking  
29  
30  
31 151 how many hours per day the child spent on outdoor activities during weekdays and  
32  
33  
34 152 weekends separately. The average time spent outdoors was calculated by the following  
35  
36  
37 153 formula: [ $T_{\text{weekday}}$  (hours spent on weekdays)  $\times$  5 +  $T_{\text{weekend}}$  (hours spent on weekends)  
38  
39 154  $\times$  2]  $\div$  7.  
40

41  
42 155 **Statistical analysis**  
43

44  
45 156 Because refraction and ocular biometrics were highly correlated between two eyes (the  
46  
47 157 Pearson correlation coefficients ( $r$ ) for refraction, AL, CCT, ACD, LT, VCD, CC and  
48  
49  
50 158 AL/CC ratio were 0.90, 0.96, 0.89, 0.93, 0.93, 0.95, 0.97 and 0.95, respectively, and all  
51  
52  
53 159  $P$  values were lower than 0.01), the data obtained from the right eye were chosen for  
54  
55  
56 160 analyses. Ocular biometrics were all normally distributed, as determined by P-P plots.  
57

58 161 T-tests were performed for quantitative variables, and chi-square tests were  
59  
60

1  
2  
3  
4 162 performed for categorical variables to analyze the differences in basic characteristics  
5  
6 163 between individuals with and without myopia. Univariate associations between  
7  
8  
9 164 anthropometric indicators and both refraction and ocular biometrics were identified.  
10  
11  
12 165 Simple linear regression models were constructed to assess the effects of height, weight,  
13  
14 166 and BMI (as independent variables) on refraction and individual ocular biometrics (as  
15  
16  
17 167 dependent variables). Tests for linear trends were performed by entering the median  
18  
19  
20 168 value of each category of the anthropometric indicator based on quartiles as a  
21  
22  
23 169 continuous variable into the models. Multiple linear regression models were then fitted  
24  
25  
26 170 after adjusting, in turn, for age and gender or for age, gender, parental myopia,  
27  
28  
29 171 family income, reading and writing distance, and time spent outdoors. In addition, all  
30  
31  
32 172 participants were divided into the following age groups: 6 to 8 years old, 9 to 11 years  
33  
34  
35 173 old, and 12 to 15 years old. The results of age-specific associations of anthropometric  
36  
37  
38 174 indicators with both refraction and ocular biometrics after controlling for the above  
39  
40  
41 175 covariates were calculated. Collinearity diagnostics were performed, and  
42  
43  
44 176 multicollinearity was absent among the independent variables used in each model.

45 177 Statistical analyses were performed using commercial statistical software (SPSS for  
46  
47  
48 178 Windows, version 20.0; IBM-SPSS, Chicago, Illinois, USA), and *P* values <0.05 were  
49  
50  
51 179 considered statistically significant.

### 52 180 **Patient and public involvement**

53  
54  
55 181 Patients and the public were not involved in developing the research questionnaire,  
56  
57  
58 182 outcome measures or overall design of this study protocol.  
59  
60

1  
2  
3  
4 183

5  
6  
7 184 **RESULTS**

8  
9 185 **Participant characteristics**

10  
11  
12 186 Among 560 students who were initially invited, a total of 482 participants ranging in  
13  
14  
15 187 age from 6 to 15 years old were available for statistical analysis after excluding 70  
16  
17  
18 188 students without parental consent, 5 students with heterotropia, and 3 students with  
19  
20  
21 189 amblyopia. The response rate in this study was 86.07% (482 of 560). Individuals who  
22  
23  
24 190 were included were older ( $9.42 \pm 2.09$  vs  $7.60 \pm 2.38$  years old,  $P < 0.01$ ) than those who  
25  
26  
27 191 were excluded. There were no significant differences in gender, parental myopia,  
28  
29 192 monthly family income, reading and writing distance, and time spent outdoors between  
30  
31 193 included and excluded individuals.

32  
33  
34 194 The overall prevalence of myopia was 71.16% (343 of 482; 95% CI, 67.01% to  
35  
36  
37 195 75.10%). The mean SER, height, weight and BMI of all participants was  $-1.48 \pm 1.82$   
38  
39  
40 196 D,  $140.79 \pm 13.95$  cm,  $38.29 \pm 10.86$  kg, and  $19.04 \pm 3.18$  kg/m<sup>2</sup>, respectively (Table  
41  
42  
43 197 1). Participants with myopia were older, taller, and heavier. These individuals were  
44  
45  
46 198 more likely to have myopic parents, a higher monthly family income, a closer reading  
47  
48  
49 199 and writing distance and to spend less time outdoors. Moreover, these participants had  
50  
51  
52 200 eyes with longer ALs, deep ACDs and VCDs, thinner LTs, and larger AL/CC ratios (all  
53  
54  
55 201  $P$  values were less than 0.05).

56  
57 202 **Bivariate correlations between variables**

58  
59 203 Bivariate correlations of body stature with both refraction and ocular biometrics are  
60

1  
2  
3  
4 204 presented in Table 2, which was of low to moderate strength. For example, height was  
5  
6  
7 205 positively correlated with AL ( $r=0.50$ ,  $P<0.01$ ), CCT ( $r=0.17$ ,  $P<0.01$ ), ACD ( $r=0.29$ ,  
8  
9 206  $P<0.01$ ), VCD ( $r=0.49$ ,  $P<0.01$ ) and the AL/CC ratio ( $r=0.49$ ,  $P<0.01$ ) and negatively  
10  
11  
12 207 correlated with SER ( $r=-0.45$ ,  $P<0.01$ ) and LT ( $r=-0.24$ ,  $P<0.01$ ).

13  
14  
15 208 **Linear trends in refraction and ocular biometrics changes by body stature**  
16  
17 209 **quartiles**

18  
19  
20 210 Taller and heavier individuals tended to have eyes with longer ALs, thicker CCTs,  
21  
22  
23 211 deeper ACDs, thinner LTs, deeper VCDs, higher AL/CC ratios, and more myopic  
24  
25  
26 212 refractions (all  $P$  values for trend were less than 0.05) (Table 3). In addition to ACD  
27  
28  
29 213 and LT, the above tendencies were also observed among more obese schoolchildren  
30  
31 214 (students with higher BMIs).

32  
33  
34 215 **Linear regression analysis of the associations between anthropometric indicators**  
35  
36 216 **and both refraction and ocular biometrics**

37  
38  
39 217 In model 1, we used the association between height and refraction as an example and  
40  
41  
42 218 found that for each 10 cm increase in height, the SER was expected to decrease by 0.59  
43  
44  
45 219 D ( $P<0.01$ ) without controlling for any covariates (Table 4). In the next two models,  
46  
47  
48 220 we controlled, in turn, for age and gender or for age, gender, parental myopia, family  
49  
50  
51 221 income, reading and writing distance and time spent outdoors. The difference in SER  
52  
53  
54 222 declined by 0.26 D ( $P<0.01$ ) and 0.21 D ( $P<0.05$ ) in models 2 and 3, respectively. In  
55  
56  
57 223 general, higher heights were associated with longer ALs (+0.14 mm,  $P<0.05$ ), deeper  
58  
59 224 VCDs (+0.13 mm,  $P<0.05$ ), greater AL/CC ratios (+0.02,  $P<0.05$ ), and more negative  
60



1  
2  
3  
4 225 refractions ( $-0.21$  D,  $P<0.05$ ) among 6- to 15-year-old participants. Nonetheless, weight  
5  
6  
7 226 and BMI were not correlated with refraction in our multiple linear regression models.  
8

9 227 Furthermore, the participants were categorized into the following age groups: 6 to 8  
10  
11  
12 228 years old ( $n=170$ ), 9 to 11 years old ( $n=158$ ), and 12 to 15 years old ( $n=154$ ). After  
13  
14  
15 229 controlling for the above covariates, the age-specific associations were calculated  
16  
17  
18 230 (Table 5). Both height and weight remained independently associated with refraction  
19  
20  
21 231 in the age range from 6 to 8 years old and 9 to 11 years old. Particularly from 9 to 11  
22  
23 232 years old, higher heights in schoolchildren were associated with longer ALs ( $+0.25$  mm,  
24  
25 233  $P<0.01$ ), deeper VCDs ( $+0.23$  mm,  $P<0.01$ ), higher AL/CC ratios ( $+0.04$ ,  $P<0.01$ ), and  
26  
27  
28 234 more negative refractions ( $-0.48$  D,  $P<0.01$ ) in their eyes. Heavier weights were also  
29  
30  
31 235 associated with longer ALs ( $+0.29$  mm,  $P<0.01$ ), deeper VCDs ( $+0.29$  mm,  $P<0.01$ ),  
32  
33  
34 236 higher AL/CC ratios ( $+0.04$ ,  $P<0.01$ ), and more negative refractions ( $-0.48$  D,  $P<0.01$ ).  
35  
36  
37 237 However, from 12 to 15 years of age, no association was detected between body stature  
38  
39 238 and refraction.  
40

41  
42 239

## 43 44 240 **DISCUSSION**

45  
46  
47 241 In this paper, we comprehensively measured ocular biometrics and then explored the  
48  
49  
50 242 overall and age-specific associations between anthropometric indicators and both  
51  
52  
53 243 refraction and ocular biometrics after adequately controlling for covariates among 6- to  
54  
55  
56 244 15-year-old schoolchildren. In China, few studies such as this one have been conducted.  
57  
58  
59 245 Wang et al.<sup>14</sup> confirmed a positive association between height and AL in 7- to 15-year-  
60

1  
2  
3  
4 246 old schoolchildren based on longitudinal data obtained in Guangzhou, China. However,  
5  
6  
7 247 detailed information about the associations between body stature and refraction and  
8  
9  
10 248 other ocular biometrics was not available in that study. Therefore, compared with  
11  
12 249 previous studies,<sup>14 28</sup> the present study achieved a more detailed analysis.

13  
14  
15 250 The current results are in almost complete agreement with those of Saw et al.<sup>17</sup> who  
16  
17 251 showed that among 1449 Singaporean Chinese children aged 7-9 years old, taller  
18  
19  
20 252 individuals were more likely to have eyes with longer ALs (+0.46 mm,  $P<0.01$ ), deeper  
21  
22  
23 253 VCDs (+0.46 mm,  $P<0.01$ ), flatter corneas (+0.10 mm,  $P<0.01$ ), greater AL/CC ratios  
24  
25  
26 254 (+0.02,  $P=0.03$ ), and refractions that trended toward myopia (-0.47 D,  $P<0.01$ ) after  
27  
28  
29 255 controlling for age, gender, parental myopia, and the number of books read per week.  
30  
31 256 A birth cohort performed in Britain to examine the relationship between height growth  
32  
33  
34 257 trajectories and the development of myopia presented similar results.<sup>10</sup> For each SD  
35  
36  
37 258 increase in height for children aged from 2.5 to 10 years old, SER became more  
38  
39  
40 259 negative by -0.075 D (95% CI, -0.112 to -0.039;  $P<0.01$ ) and -0.081 D (95% CI, -0.129  
41  
42  
43 260 to -0.034;  $P<0.01$ ) when the children reached 11 and 15 years old, respectively.  
44  
45  
46 261 However, Huang et al.<sup>28</sup> reported that no significant correlation between myopia shift  
47  
48  
49 262 and height changes among schoolchildren aged 7 to 9 years old in Taiwan, China.

50 263 Although the association remains unclear, these results will help us to further explore  
51  
52  
53 264 the intricate relationship between the development of physical characteristics and  
54  
55  
56 265 refraction. A commonly proposed explanation for this potential association is that both  
57  
58  
59 266 higher height and myopia are independent consequences of better socioeconomic status;  
60

1  
2  
3  
4 267 therefore, there may be no causal relationship between height and myopia.<sup>17 23</sup> However,  
5  
6  
7 268 in this study, after we controlled for socioeconomic characteristics and myopia-related  
8  
9  
10 269 risk factors, height remained independently related to refraction and various ocular  
11  
12 270 biometrics. Myopia most commonly develops during the period from childhood to early  
13  
14  
15 271 adolescence (from approximately 8 to 14 years old),<sup>30</sup> and growth spurts also occur in  
16  
17  
18 272 this period.<sup>31</sup> The early period of adolescence is mainly characterized by growth spurts  
19  
20  
21 273 and the onset of sexual development, which lasts for approximately 2 or 3 years.<sup>32</sup> The  
22  
23  
24 274 age range of early adolescence is approximately 8 to 11 years old. Therefore, we  
25  
26  
27 275 inferred that the development of refraction could be related to physical development  
28  
29  
30 276 during the early period of adolescent growth. The findings of the Singapore Cohort  
31  
32  
33 277 Study of Risk Factors for Myopia (SCORM) support this hypothesis.<sup>19</sup> SCORM  
34  
35  
36 278 reported that boys and girls who experienced earlier peak height velocity also achieved  
37  
38  
39 279 earlier peak SER velocity (at a mean age of 10.1 vs 10.6 years old for boys,  $P=0.01$ ,  
40  
41  
42 280 and 10.0 vs 10.6 years old for girls,  $P=0.01$ ) and had an earlier age of onset of myopia  
43  
44  
45 281 (9.9 vs 10.4 years old for boys,  $P=0.03$ , and 9.7 vs 10.1 years old for girls,  $P=0.04$ ).  
46  
47  
48 282 The exact biologic pathways underlying these associations are currently unknown.  
49  
50  
51 283 Some major systemic hormones, such as growth hormone, thymic hormone and insulin-  
52  
53  
54 284 like growth factors (IGFs), reportedly could regulate longitudinal bone growth during  
55  
56  
57 285 childhood, which are also involved in the development of experimental myopia.<sup>33 34</sup> In  
58  
59  
60 286 addition, epidemiological studies reported that children with growth hormone  
287 deficiency have shorter body stature and ALs than usual.<sup>35</sup> Growth hormone

1  
2  
3  
4 288 supplementation in these children could partially bring the stature and ALs back within  
5  
6  
7 289 the normal range.<sup>36</sup> Sex hormones may be another significant mediator during  
8  
9  
10 290 puberty,<sup>37</sup> but our age-specific results (no association was detected in 12- to 15-year-  
11  
12  
13 291 old participants) may not support this idea. Although these hormones were not  
14  
15  
16 292 determined in this cross-sectional study, we believe that the shared mechanism between  
17  
18  
19 293 height and refraction may shed new light on the etiology of myopia and the efforts to  
20  
21  
22 294 explore the effect of endocrine traits observed during childhood and adolescence on  
23  
24  
25 295 body and eye size in the future studies.

26 296 The relationships weight and BMI share with refraction are not as extensively studied  
27  
28  
29 297 as those with height, but the findings regarding these relationships are also inconclusive.  
30  
31  
32 298 Heavier and more obese Chinese children and adults in Singapore have refractions that  
33  
34  
35 299 trend toward hyperopia.<sup>17 23</sup> Moreover, heavier adults in rural Myanmar reportedly have  
36  
37  
38 300 more positive refractions.<sup>25</sup> However, a cross-sectional study performed in 19-year-old  
39  
40  
41 301 male conscripts in South Korea found that weight and BMI had no effect on refraction.<sup>27</sup>  
42  
43  
44 302 Consistent with the results of a twin study performed in Australia,<sup>22</sup> in our study,  
45  
46  
47 303 heavier weights were associated with more negative refractions among participants  
48  
49  
50 304 aged 6 to 8 and 9 to 11 years old.

51 305 This study has several limitations that warrant consideration. First, information on  
52  
53  
54 306 putative myopia risk factors obtained from our questionnaire (e.g., the distance between  
55  
56  
57 307 the child's eyes and a book when reading or writing) was subjectively estimated by the  
58  
59  
60 308 parents. Although this method has been widely applied in previous studies,<sup>17 28</sup> it can

1  
2  
3  
4 309 lead to recall bias. Second, the representativeness of the participants in this study may  
5  
6  
7 310 be affected to some extent because the participants were volunteers. Although there  
8  
9  
10 311 were no significant differences in nearly all basic characteristics between participants  
11  
12 312 and those excluded, individuals who were included were older, which may have  
13  
14  
15 313 resulted in overestimation of the prevalence of myopia in our study. Third, all of the  
16  
17 314 data collected in this study were cross-sectional in nature and do not allow an evaluation  
18  
19  
20 315 of causality. Therefore, whether the conclusions drawn from this study are applicable  
21  
22  
23 316 to longitudinal relationships remains uncertain. Additionally, the significant correlation  
24  
25  
26 317 observed in our study needs to be interpreted carefully because of the small sample size.  
27  
28  
29 318 It is important to avoid making strong conclusions about these associations, regardless  
30  
31  
32 319 of whether the results were positive. A larger sample size study is needed in the future  
33  
34  
35 320 to validate our conclusions. Despite these limitations, we believe that our study  
36  
37  
38 321 provides a valuable reference regarding the associations between anthropometric  
39  
40  
41 322 indicators and both refraction and ocular biometrics in Chinese schoolchildren aged 6  
42  
43  
44 323 to 15 years old.

45 324 In conclusion, both higher heights and heavier weights were associated with longer  
46  
47  
48 325 ALs, deeper VCDs, higher AL/CC ratios and more myopic refractions during the early  
49  
50  
51 326 period of adolescent growth after controlling for age, gender, parental myopia,  
52  
53  
54 327 family income, reading and writing distance, and time spent outdoors. The results of  
55  
56  
57 328 this study support the idea that a shared mechanism may regulate the coordinated  
58  
59  
60 329 growth of body and eye size in children.

1  
2  
3  
4 330

5  
6  
7 331 **Acknowledgments:** The authors thank all families who participated in our study,  
8  
9 332 Tianjin Eye Hospital for their help with ocular examinations, and all team members in  
10  
11 333 the Department of Maternal, Child and Adolescent Health at the School of Public  
12  
13 334 Health of Tianjin Medical University.

14  
15  
16  
17 335 **Contributors:** Design of the study: SL and XZ. Collection and management of the data:  
18  
19 336 SY, SL, WL and QW. Analysis and interpretation of the data: SY. Review and approval  
20  
21 337 of the manuscript: SY, SL, WL, QW, WX and XZ.

22  
23  
24  
25 338 **Funding:** This study was supported by grants from the Key Scientific Project of Tianjin  
26  
27 339 Science and Technology Commission of China (15ZCZDSY01050) and the National  
28  
29 340 Natural Science Foundation of China (No. 81773459).

30  
31  
32  
33 341 **Competing interests:** None declared.

34  
35  
36 342 **Patient consent:** Obtained.

37  
38  
39 343 **Ethics approval:** Ethics Committee of Tianjin Medical University, China.

40  
41  
42 344 **Provenance and peer review:** Not commissioned; externally peer reviewed.

43  
44  
45 345 **Data sharing statement:** No additional data are available.

46  
47 346

48  
49  
50 347 **REFERENCES**

51  
52  
53 348 1. Morgan IG, French AN, Ashby RS, et al. The epidemics of myopia: Aetiology and  
54  
55 349 prevention. *Prog Retin Eye Res* 2018;62:134-49.

56  
57  
58 350 2. Kim MH, Zhao D, Kim W, et al. Heritability of myopia and ocular biometrics in  
59  
60

- 1  
2  
3  
4 351 Koreans: the healthy twin study. *Investigative ophthalmology & visual science*  
5  
6  
7 352 2013;54(5):3644-9.  
8  
9 353 3. Ma Y, Zou H, Lin S, et al. Cohort study with 4-year follow-up of myopia and  
10  
11  
12 354 refractive parameters in primary schoolchildren in Baoshan District, Shanghai. *Clin*  
13  
14  
15 355 *Exp Ophthalmol* 2018  
16  
17 356 4. Huang HM, Chang DS, Wu PC. The Association between Near Work Activities and  
18  
19  
20 357 Myopia in Children-A Systematic Review and Meta-Analysis. *PloS one*  
21  
22  
23 358 2015;10(10):e0140419.  
24  
25  
26 359 5. Wu LJ, Wang YX, You QS, et al. Risk Factors of Myopic Shift among Primary  
27  
28  
29 360 School Children in Beijing, China: A Prospective Study. *International journal of*  
30  
31  
32 361 *medical sciences* 2015;12(8):633-8.  
33  
34  
35 362 6. He M, Xiang F, Zeng Y, et al. Effect of Time Spent Outdoors at School on the  
36  
37  
38 363 Development of Myopia Among Children in China: A Randomized Clinical Trial.  
39  
40  
41 364 *Jama* 2015;314(11):1142-8.  
42  
43  
44 365 7. Xiong S, Sankaridurg P, Naduvilath T, et al. Time spent in outdoor activities in  
45  
46  
47 366 relation to myopia prevention and control: a meta-analysis and systematic review. *Acta*  
48  
49  
50 367 *ophthalmologica* 2017;95(6):551-66.  
51  
52  
53 368 8. Mirshahi A, Ponto K, Hoehn R, et al. Myopia and level of education: results from  
54  
55  
56 369 the Gutenberg Health Study. *Ophthalmology* 2014;121(10):2047-52.  
57  
58  
59 370 9. Williams KM, Bertelsen G, Cumberland P, et al. Increasing Prevalence of Myopia  
60  
371 in Europe and the Impact of Education. *Ophthalmology* 2015;122(7):1489-97.

- 1  
2  
3  
4 372 10. Northstone K, Guggenheim JA, Howe LD, et al. Body stature growth trajectories  
5  
6 373 during childhood and the development of myopia. *Ophthalmology* 2013;120(5):1064-  
7  
8  
9 374 73.
- 11 375 11. Lee DC, Lee SY, Kim YC. An epidemiological study of the risk factors associated  
12  
13  
14 376 with myopia in young adult men in Korea. *Scientific reports* 2018;8(1):511.
- 17 377 12. Morgan IG, Ohno-Matsui K, Saw S-M. Myopia. *The Lancet* 2012;379(9827):1739-  
18  
19  
20 378 48.
- 23 379 13. Goss DA, Cox VD, Herrin-Lawson GA, et al. Refractive error, axial length, and  
24  
25 380 height as a function of age in young myopes. *Optometry and vision science : official*  
26  
27  
28 381 *publication of the American Academy of Optometry* 1990;67(5):332-8.
- 31 382 14. Wang D, Ding X, Liu B, et al. Longitudinal changes of axial length and height are  
32  
33 383 associated and concomitant in children. *Investigative ophthalmology & visual science*  
34  
35  
36 384 2011;52(11):7949-53.
- 39 385 15. Prashar A, Hocking PM, Erichsen JT, et al. Common determinants of body size and  
40  
41  
42 386 eye size in chickens from an advanced intercross line. *Experimental eye research*  
43  
44  
45 387 2009;89(1):42-8.
- 47 388 16. Zhang J, Hur YM, Huang W, et al. Shared genetic determinants of axial length and  
48  
49  
50 389 height in children: the Guangzhou twin eye study. *Archives of ophthalmology (Chicago,*  
51  
52  
53 390 *Ill : 1960)* 2011;129(1):63-8.
- 55 391 17. Saw SM, Chua WH, Hong CY, et al. Height and its relationship to refraction and  
56  
57  
58 392 biometry parameters in Singapore Chinese children. *Investigative ophthalmology &*  
59  
60



- 1  
2  
3  
4 393 *visual science* 2002;43(5):1408-13.  
5  
6  
7 394 18. Rahi JS, Cumberland PM, Peckham CS. Myopia over the lifecourse: prevalence  
8  
9 395 and early life influences in the 1958 British birth cohort. *Ophthalmology*  
10  
11  
12 396 2011;118(5):797-804.  
13  
14  
15 397 19. Yip VC, Pan CW, Lin XY, et al. The relationship between growth spurts and  
16  
17 398 myopia in Singapore children. *Investigative ophthalmology & visual science*  
18  
19 399 2012;53(13):7961-6.  
20  
21  
22  
23 400 20. Rim TH, Kim SH, Lim KH, et al. Body Stature as an Age-Dependent Risk Factor  
24  
25 401 for Myopia in a South Korean Population. *Seminars in ophthalmology* 2017;32(3):326-  
26  
27 402 36.  
28  
29  
30  
31 403 21. Gardiner PA. Physical growth and the progress of myopia. *Lancet*  
32  
33 404 1955;269(6897):952-3.  
34  
35  
36 405 22. Dirani M, Islam A, Baird PN. Body stature and myopia-The Genes in Myopia  
37  
38 406 (GEM) twin study. *Ophthalmic epidemiology* 2008;15(3):135-9.  
39  
40  
41  
42 407 23. Wong TY, Foster PJ, Johnson GJ, et al. The relationship between ocular dimensions  
43  
44 408 and refraction with adult stature: the Tanjong Pagar Survey. *Investigative*  
45  
46 409 *ophthalmology & visual science* 2001;42(6):1237-42.  
47  
48  
49  
50 410 24. Ojaimi E, Morgan IG, Robaei D, et al. Effect of stature and other anthropometric  
51  
52 411 parameters on eye size and refraction in a population-based study of Australian children.  
53  
54 412 *Investigative ophthalmology & visual science* 2005;46(12):4424-9.  
55  
56  
57  
58 413 25. Wu HM, Gupta A, Newland HS, et al. Association between stature, ocular biometry  
59  
60

- 1  
2  
3  
4 414 and refraction in an adult population in rural Myanmar: the Meiktila eye study. *Clin*  
5  
6  
7 415 *Exp Ophthalmol* 2007;35(9):834-39.
- 8  
9 416 26. Sharma A, Congdon N, Gao Y, et al. Height, stunting, and refractive error among  
10  
11  
12 417 rural Chinese schoolchildren: the See Well to Learn Well project. *American journal of*  
13  
14  
15 418 *ophthalmology* 2010;149(2):347-53.
- 16  
17 419 27. Jung SK, Lee JH, Kakizaki H, et al. Prevalence of myopia and its association with  
18  
19  
20 420 body stature and educational level in 19-year-old male conscripts in seoul, South Korea.  
21  
22  
23 421 *Investigative ophthalmology & visual science* 2012;53(9):5579-83.
- 24  
25 422 28. Huang CY, Hou CH, Lin KK, et al. Relationship of lifestyle and body stature growth  
26  
27  
28 423 with the development of myopia and axial length elongation in Taiwanese elementary  
29  
30  
31 424 school children. *Indian journal of ophthalmology* 2014;62(8):865-9.
- 32  
33 425 29. National Student Physique and Health Research Group. The instruction manual of  
34  
35  
36 426 national survey in Physique and health of Chinese schoolchildren (2014) [M]. Beijing:  
37  
38  
39 427 Higher Education Press, 2014: 41-45.
- 40  
41 428 30. Baird P, Schäche M, Dirani M. The GENes in Myopia (GEM) study in  
42  
43  
44 429 understanding the aetiology of refractive errors. *Prog Retin Eye Res* 2010;29(6):520-  
45  
46  
47 430 42.
- 48  
49 431 31. Limony Y, Koziel S, Friger M. Age of onset of a normally timed pubertal growth  
50  
51  
52 432 spurt affects the final height of children. *Pediatr Res* 2015;78(3):351-5.
- 53  
54 433 32. Chengye J. Child and adolescent health[M]. Beijing: People's Medical Publishing  
55  
56  
57 434 House, 2014: 51-51.
- 58  
59  
60

- 1  
2  
3  
4 435 33. Rada JA, Wiechmann AF. Ocular expression of avian thymic hormone: changes  
5  
6  
7 436 during the recovery from induced myopia. *Molecular vision* 2009;15:778-92.  
8  
9  
10 437 34. Kusakari T, Sato T, Tokoro T. Visual deprivation stimulates the exchange of the  
11  
12 438 fibrous sclera into the cartilaginous sclera in chicks. *Experimental eye research*  
13  
14  
15 439 2001;73(4):533-46.  
16  
17  
18 440 35. Parentin F, Tonini G, Perissutti P. Refractive evaluation in children with growth  
19  
20 441 defect. *Current eye research* 2004;28(1):11-5.  
21  
22  
23 442 36. Parentin F, Perissutti P. Congenital growth hormone deficiency and eye refraction:  
24  
25 443 a longitudinal study. *Ophthalmologica Journal internationale d'ophtalmologie*  
26  
27  
28 444 *International journal of ophthalmology Zeitschrift fur Augenheilkunde*  
29  
30  
31 445 2005;219(4):226-31.  
32  
33  
34 446 37. Ogueta SB, Schwartz SD, Yamashita CK, et al. Estrogen receptor in the human eye:  
35  
36 447 influence of gender and age on gene expression. *Investigative ophthalmology & visual*  
37  
38  
39 448 *science* 1999;40(9):1906-11.  
40  
41  
42 449

**Table 1** Summary of the characteristics of the participants.

|                               | Total          | Myopia         | Nonmyopia      | <i>P</i> Value |
|-------------------------------|----------------|----------------|----------------|----------------|
| Age (years)                   | 9.42 ± 2.09    | 9.88 ± 2.14    | 8.30 ± 1.45    | <0.01          |
| Male                          | 264 (54.77)    | 187 (54.52)    | 77 (55.40)     | 0.86           |
| Female                        | 218 (45.23)    | 156 (45.48)    | 62 (44.60)     | 0.86           |
| Parental myopia*              |                |                |                | <0.01          |
| None                          | 129 (28.48)    | 74 (23.13)     | 55 (41.35)     |                |
| One parent                    | 188 (41.50)    | 134 (41.88)    | 54 (40.60)     |                |
| Both parents                  | 136 (30.02)    | 112 (35.00)    | 24 (18.05)     |                |
| Monthly family income*        |                |                |                | <0.05          |
| <4000 RMB                     | 41 (8.78)      | 27 (8.16)      | 14 (10.29)     |                |
| 4000-8000 RMB                 | 136 (29.12)    | 89 (26.89)     | 47 (34.56)     |                |
| 8000-10,000 RMB               | 133 (28.48)    | 89 (26.89)     | 44 (32.35)     |                |
| 10,000-15,000 RMB             | 91 (19.49)     | 73 (22.05)     | 18 (13.24)     |                |
| ≥15,000 RMB                   | 66 (14.13)     | 53 (16.01)     | 13 (9.56)      |                |
| Reading and writing distance* |                |                |                | <0.05          |
| <10 cm                        | 45 (9.62)      | 36 (10.81)     | 9 (6.67)       |                |
| 10-20 cm                      | 200 (42.74)    | 148 (44.44)    | 52 (38.52)     |                |
| 20-30 cm                      | 166 (35.47)    | 117 (35.14)    | 49 (36.30)     |                |
| ≥30 cm                        | 57 (12.18)     | 32 (9.61)      | 25 (18.52)     |                |
| Time spent outdoors (hours)   | 1.20 ± 0.70    | 1.16 ± 0.70    | 1.31 ± 0.69    | <0.05          |
| Height (cm)                   | 140.79 ± 13.95 | 143.85 ± 14.17 | 133.22 ± 10.01 | <0.01          |
| Weight (kg)                   | 38.29 ± 10.86  | 40.06 ± 11.05  | 33.92 ± 9.01   | <0.01          |
| BMI (kg/m <sup>2</sup> )      | 19.04 ± 3.18   | 19.10 ± 3.14   | 18.89 ± 3.28   | 0.52           |
| SER (D)                       | -1.48 ± 1.82   | -2.20 ± 1.66   | 0.30 ± 0.54    | <0.01          |
| AL (mm)                       | 23.81 ± 1.12   | 24.16 ± 1.07   | 22.95 ± 0.72   | <0.01          |
| CCT (μm)                      | 547.65 ± 32.44 | 548.88 ± 33.32 | 544.63 ± 30.05 | 0.19           |
| ACD (mm)                      | 3.08 ± 0.26    | 3.14 ± 0.25    | 2.94 ± 0.23    | <0.01          |

|             |              |              |              |       |
|-------------|--------------|--------------|--------------|-------|
| LT (mm)     | 3.47 ± 0.20  | 3.43 ± 0.20  | 3.55 ± 0.19  | <0.01 |
| VCD (mm)    | 17.27 ± 1.09 | 17.60 ± 1.05 | 16.46 ± 0.71 | <0.01 |
| CC (mm)     | 7.78 ± 0.26  | 7.78 ± 0.25  | 7.79 ± 0.26  | 0.84  |
| AL/CC ratio | 3.06 ± 0.13  | 3.11 ± 0.13  | 2.95 ± 0.07  | <0.01 |

Data are presented as the means with standard deviation (SD) or as n (%).

\*Numbers of individuals vary due to missing data.

**Table 2** Bivariate correlations of body stature with refraction and ocular biometrics.

|             | Height (cm) | Weight (kg) | BMI (kg/m <sup>2</sup> ) |
|-------------|-------------|-------------|--------------------------|
| SER (D)     | -0.45**     | -0.39**     | -0.11*                   |
| AL (mm)     | 0.50**      | 0.45**      | 0.15*                    |
| CCT (µm)    | 0.17**      | 0.19**      | 0.09*                    |
| ACD (mm)    | 0.29**      | 0.22**      | 0.03                     |
| LT (mm)     | -0.24**     | -0.19**     | -0.04                    |
| VCD (mm)    | 0.49**      | 0.44**      | 0.16**                   |
| CC (mm)     | 0.07        | 0.10*       | 0.08                     |
| AL/CC ratio | 0.49**      | 0.40**      | 0.10*                    |

Data are the Pearson correlation coefficients.

\*:  $P < 0.05$ .

\*\* :  $P < 0.01$ .

**Table 3** Unadjusted mean values of refraction and ocular biometrics by quartiles of height, weight and BMI.

|                               | Range       | n   | SER (D)                  | AL (mm)          | CCT ( $\mu\text{m}$ ) | ACD (mm)        |
|-------------------------------|-------------|-----|--------------------------|------------------|-----------------------|-----------------|
| <i>Height (cm)</i>            |             |     |                          |                  |                       |                 |
| 1st quartile                  | 100.0~130.0 | 127 | $-0.48 \pm 1.13^\dagger$ | $23.09 \pm 0.78$ | $542.11 \pm 30.93$    | $2.97 \pm 0.24$ |
| 2nd quartile                  | 130.1~140.0 | 136 | $-1.08 \pm 1.46$         | $23.58 \pm 0.98$ | $544.96 \pm 32.69$    | $3.05 \pm 0.28$ |
| 3rd quartile                  | 140.1~150.7 | 99  | $-1.86 \pm 1.80$         | $24.15 \pm 1.01$ | $550.04 \pm 32.31$    | $3.16 \pm 0.23$ |
| 4th quartile                  | 150.8~182.5 | 120 | $-2.68 \pm 2.06$         | $24.56 \pm 1.14$ | $554.58 \pm 32.76$    | $3.18 \pm 0.22$ |
| <i>P</i> for trend‡           |             |     | <i>P</i> <0.01           | <i>P</i> <0.01   | <i>P</i> <0.05        | <i>P</i> <0.01  |
| <i>Weight (kg)</i>            |             |     |                          |                  |                       |                 |
| 1st quartile                  | 20.0~30.0   | 129 | $-0.59 \pm 1.19$         | $23.19 \pm 0.80$ | $541.27 \pm 32.75$    | $3.02 \pm 0.26$ |
| 2nd quartile                  | 30.1~36.1   | 112 | $-1.12 \pm 1.30$         | $23.58 \pm 1.00$ | $547.64 \pm 31.34$    | $3.04 \pm 0.26$ |
| 3rd quartile                  | 36.2~45.0   | 128 | $-1.75 \pm 1.92$         | $24.02 \pm 1.12$ | $544.17 \pm 31.56$    | $3.12 \pm 0.24$ |
| 4th quartile                  | 45.1~82.3   | 113 | $-2.54 \pm 2.14$         | $24.52 \pm 1.12$ | $558.92 \pm 31.65$    | $3.16 \pm 0.24$ |
| <i>P</i> for trend            |             |     | <i>P</i> <0.01           | <i>P</i> <0.01   | <i>P</i> <0.01        | <i>P</i> <0.01  |
| <i>BMI (kg/m<sup>2</sup>)</i> |             |     |                          |                  |                       |                 |
| 1st quartile                  | 14.0~16.5   | 121 | $-1.19 \pm 1.62$         | $23.55 \pm 1.05$ | $543.79 \pm 31.55$    | $3.09 \pm 0.25$ |
| 2nd quartile                  | 16.6~18.4   | 120 | $-1.39 \pm 1.69$         | $23.80 \pm 1.14$ | $545.79 \pm 32.26$    | $3.05 \pm 0.28$ |

| 3rd quartile                  | 18.5~20.8   | 120 | -1.59 ± 1.88   | 23.90 ± 1.12   | 547.12 ± 32.16 | 3.09 ± 0.25    |
|-------------------------------|-------------|-----|----------------|----------------|----------------|----------------|
| 4th quartile                  | 20.9~30.6   | 121 | -1.74 ± 2.05   | 24.00 ± 1.16   | 533.90 ± 33.26 | 3.11 ± 0.25    |
| <i>P</i> for trend            |             |     | <i>P</i> <0.05 | <i>P</i> <0.01 | <i>P</i> <0.05 | <i>P</i> =0.32 |
|                               | Range       | n   | LT (mm)        | VCD (mm)       | CC (mm)        | AL/CC ratio    |
| <i>Height (cm)</i>            |             |     |                |                |                |                |
| 1st quartile                  | 100.0~130.0 | 127 | 3.55 ± 0.19    | 16.57 ± 0.74   | 7.75 ± 0.25    | 2.98 ± 0.09    |
| 2nd quartile                  | 130.1~140.0 | 136 | 3.48 ± 0.23    | 17.07 ± 0.96   | 7.79 ± 0.27    | 3.03 ± 0.11    |
| 3rd quartile                  | 140.1~150.7 | 99  | 3.42 ± 0.18    | 17.58 ± 0.99   | 7.81 ± 0.26    | 3.09 ± 0.13    |
| 4th quartile                  | 150.8~182.5 | 120 | 3.41 ± 0.19    | 17.97 ± 1.12   | 7.78 ± 0.25    | 3.16 ± 0.14    |
| <i>P</i> for trend            |             |     | <i>P</i> <0.01 | <i>P</i> <0.01 | <i>P</i> =0.36 | <i>P</i> <0.01 |
| <i>Weight (kg)</i>            |             |     |                |                |                |                |
| 1st quartile                  | 20.0~30.0   | 129 | 3.51 ± 0.20    | 16.64 ± 0.77   | 7.75 ± 0.25    | 2.99 ± 0.10    |
| 2nd quartile                  | 30.1~36.1   | 112 | 3.49 ± 0.21    | 17.07 ± 0.97   | 7.78 ± 0.28    | 3.03 ± 0.11    |
| 3rd quartile                  | 36.2~45.0   | 128 | 3.45 ± 0.21    | 17.46 ± 1.10   | 7.80 ± 0.24    | 3.08 ± 0.13    |
| 4th quartile                  | 45.1~82.3   | 113 | 3.40 ± 0.19    | 17.95 ± 1.08   | 7.81 ± 0.25    | 3.14 ± 0.15    |
| <i>P</i> for trend            |             |     | <i>P</i> <0.01 | <i>P</i> <0.01 | <i>P</i> =0.08 | <i>P</i> <0.01 |
| <i>BMI (kg/m<sup>2</sup>)</i> |             |     |                |                |                |                |

1  
2  
3  
4  
5  
6  
7  
8  
9  
10  
11  
12  
13  
14  
15  
16  
17  
18  
19  
20  
21  
22  
23  
24  
25  
26  
27  
28  
29  
30  
31  
32  
33  
34  
35  
36  
37  
38  
39  
40  
41  
42  
43  
44  
45  
46

|                    |           |     |                |                |                |                |
|--------------------|-----------|-----|----------------|----------------|----------------|----------------|
| 1st quartile       | 14.0~16.5 | 121 | 3.45 ± 0.18    | 17.01 ± 1.05   | 7.73 ± 0.26    | 3.05 ± 0.12    |
| 2nd quartile       | 16.6~18.4 | 120 | 3.51 ± 0.23    | 17.23 ± 1.04   | 7.81 ± 0.26    | 3.05 ± 0.13    |
| 3rd quartile       | 18.5~20.8 | 120 | 3.46 ± 0.20    | 17.38 ± 1.11   | 7.81 ± 0.26    | 3.06 ± 0.14    |
| 4th quartile       | 20.9~30.6 | 121 | 3.44 ± 0.20    | 17.46 ± 1.13   | 7.79 ± 0.24    | 3.08 ± 0.14    |
| <i>P</i> for trend |           |     | <i>P</i> =0.37 | <i>P</i> <0.01 | <i>P</i> =0.19 | <i>P</i> <0.05 |

†Data are expressed as means ± SD.

‡Tests for linear trend is performed by entering the median value of each category of the anthropometric indicator as a continuous variable in the models.

**Table 4** Multiple linear regression models of refraction and ocular biometry by height, weight, and BMI.

|                           | <b>Model 1</b>        | <b><i>P</i> Value</b> | <b>Model 2</b>       | <b><i>P</i> Value</b> | <b>Model 3</b>       | <b><i>P</i> Value</b> |
|---------------------------|-----------------------|-----------------------|----------------------|-----------------------|----------------------|-----------------------|
| <i>Height (per 10 cm)</i> |                       |                       |                      |                       |                      |                       |
| SER (D)                   | -0.59 (-0.70, -0.49)† | <0.01                 | -0.26 (-0.45, -0.08) | <0.01                 | -0.21 (-0.40, -0.01) | <0.05                 |
| AL (mm)                   | 0.40 (0.34, 0.47)     | <0.01                 | 0.18 (0.07, 0.29)    | <0.01                 | 0.14 (0.03, 0.26)    | <0.05                 |
| CCT (µm)                  | 4.03 (1.97, 6.08)     | <0.01                 | 2.43 (-1.29, 6.16)   | 0.20                  | 3.41 (-0.76, 7.58)   | 0.11                  |
| ACD (mm)                  | 0.05 (0.04, 0.07)     | <0.01                 | 0.02 (-0.01, 0.05)   | 0.17                  | 0.02 (-0.02, 0.05)   | 0.34                  |



|    |                                      |                      |       |                      |       |                     |       |
|----|--------------------------------------|----------------------|-------|----------------------|-------|---------------------|-------|
| 1  |                                      |                      |       |                      |       |                     |       |
| 2  |                                      |                      |       |                      |       |                     |       |
| 3  |                                      |                      |       |                      |       |                     |       |
| 4  |                                      |                      |       |                      |       |                     |       |
| 5  | LT (mm)                              | -0.04 (-0.05, -0.02) | <0.01 | -0.01 (-0.03, 0.02)  | 0.57  | -0.01 (-0.03, 0.02) | 0.75  |
| 6  |                                      |                      |       |                      |       |                     |       |
| 7  | VCD (mm)                             | 0.38 (0.32, 0.44)    | <0.01 | 0.17 (0.06, 0.27)    | <0.01 | 0.13 (0.02, 0.25)   | <0.05 |
| 8  |                                      |                      |       |                      |       |                     |       |
| 9  | CC (mm)                              | 0.01 (-0.01, 0.03)   | 0.13  | 0.01 (-0.02, 0.04)   | 0.41  | 0.01 (-0.03, 0.04)  | 0.81  |
| 10 |                                      |                      |       |                      |       |                     |       |
| 11 | AL/CC ratio                          | 0.05 (0.04, 0.06)    | <0.01 | 0.02 (0.01, 0.03)    | <0.01 | 0.02 (0.01, 0.03)   | <0.05 |
| 12 |                                      |                      |       |                      |       |                     |       |
| 13 | <i>Weight (per 10 kg)</i>            |                      |       |                      |       |                     |       |
| 14 |                                      |                      |       |                      |       |                     |       |
| 15 | SER (D)                              | -0.65 (-0.79, -0.51) | <0.01 | -0.21 (-0.39, -0.03) | <0.05 | -0.18 (-0.36, 0.01) | 0.07  |
| 16 |                                      |                      |       |                      |       |                     |       |
| 17 | AL (mm)                              | 0.46 (0.38, 0.55)    | <0.01 | 0.16 (0.05, 0.26)    | <0.01 | 0.15 (0.04, 0.26)   | <0.01 |
| 18 |                                      |                      |       |                      |       |                     |       |
| 19 | CCT ( $\mu\text{m}$ )                | 5.56 (2.93, 8.20)    | <0.01 | 3.68 (0.06, 7.29)    | <0.05 | 4.44 (0.42, 8.47)   | <0.05 |
| 20 |                                      |                      |       |                      |       |                     |       |
| 21 | ACD (mm)                             | 0.05 (0.03, 0.07)    | <0.01 | -0.01 (-0.03, 0.02)  | 0.90  | -0.01 (-0.03, 0.03) | 0.87  |
| 22 |                                      |                      |       |                      |       |                     |       |
| 23 | LT (mm)                              | -0.04 (-0.05, -0.02) | <0.01 | 0.01 (-0.02, 0.02)   | 0.95  | 0.01 (-0.02, 0.03)  | 0.96  |
| 24 |                                      |                      |       |                      |       |                     |       |
| 25 | VCD (mm)                             | 0.44 (0.36, 0.53)    | <0.01 | 0.16 (0.06, 0.27)    | <0.01 | 0.15 (0.04, 0.26)   | <0.01 |
| 26 |                                      |                      |       |                      |       |                     |       |
| 27 | CC (mm)                              | 0.03 (0.01, 0.05)    | <0.05 | 0.02 (-0.01, 0.05)   | 0.11  | 0.02 (-0.01, 0.05)  | 0.14  |
| 28 |                                      |                      |       |                      |       |                     |       |
| 29 | AL/CC ratio                          | 0.05 (0.04, 0.06)    | <0.01 | 0.01 (-0.01, 0.02)   | 0.10  | 0.01 (-0.01, 0.02)  | 0.16  |
| 30 |                                      |                      |       |                      |       |                     |       |
| 31 | <i>BMI (per 10 kg/m<sup>2</sup>)</i> |                      |       |                      |       |                     |       |
| 32 |                                      |                      |       |                      |       |                     |       |
| 33 | SER (D)                              | -0.64 (-1.15, -0.13) | <0.05 | -0.26 (-0.73, 0.20)  | 0.26  | -0.27 (-0.74, 0.20) | 0.25  |
| 34 |                                      |                      |       |                      |       |                     |       |
| 35 | AL (mm)                              | 0.53 (0.21, 0.84)    | <0.01 | 0.20 (-0.07, 0.47)   | 0.15  | 0.23 (-0.05, 0.50)  | 0.10  |
| 36 |                                      |                      |       |                      |       |                     |       |
| 37 | CCT ( $\mu\text{m}$ )                | 9.50 (0.35, 18.65)   | <0.05 | 6.37 (-2.79, 15.53)  | 0.17  | 7.19 (-2.87, 17.25) | 0.16  |
| 38 |                                      |                      |       |                      |       |                     |       |
| 39 |                                      |                      |       |                      |       |                     |       |
| 40 |                                      |                      |       |                      |       |                     |       |
| 41 |                                      |                      |       |                      |       |                     |       |
| 42 |                                      |                      |       |                      |       |                     |       |
| 43 |                                      |                      |       |                      |       |                     |       |
| 44 |                                      |                      |       |                      |       |                     |       |
| 45 |                                      |                      |       |                      |       |                     |       |
| 46 |                                      |                      |       |                      |       |                     |       |

1  
2  
3  
4  
5  
6  
7  
8  
9  
10  
11  
12  
13  
14  
15  
16  
17  
18  
19  
20  
21  
22  
23  
24  
25  
26  
27  
28  
29  
30  
31  
32  
33  
34  
35  
36  
37  
38  
39  
40  
41  
42  
43  
44  
45  
46

|             |                     |       |                     |      |                     |      |
|-------------|---------------------|-------|---------------------|------|---------------------|------|
| ACD (mm)    | 0.03 (-0.05, 0.10)  | 0.50  | -0.03 (-0.10, 0.04) | 0.46 | -0.02 (-0.10, 0.05) | 0.52 |
| LT (mm)     | -0.02 (-0.08, 0.03) | 0.42  | 0.01 (-0.05, 0.07)  | 0.79 | 0.01 (-0.06, 0.07)  | 0.86 |
| VCD (mm)    | 0.55 (0.24, 0.85)   | <0.01 | 0.23 (-0.03, 0.50)  | 0.09 | 0.25 (-0.03, 0.52)  | 0.08 |
| CC (mm)     | 0.06 (-0.01, 0.14)  | 0.09  | 0.04 (-0.03, 0.11)  | 0.25 | 0.06 (-0.02, 0.14)  | 0.13 |
| AL/CC ratio | 0.04 (0.01, 0.08)   | <0.05 | 0.01 (-0.02, 0.04)  | 0.58 | 0.01 (-0.03, 0.04)  | 0.67 |

†Each value represents a separate regression model, with height, weight, or BMI used as the independent variable, the refraction or individual ocular biometrics used as the dependent variable, either alone or with various confounders. Data in parentheses represents the 95% confidence interval.

Model 1 constructs based on crude data. In the next two models, we controlled, in turn, for age and gender or for age, gender, parental myopia, family income, reading and writing distance, and time spent outdoors.

**Table 5** Age-specific results of the associations of anthropometric indicators with both refraction and ocular biometrics.

|                           | 6-8 years old (n=170) | 9-11 years old (n=158) | 12-15 years old (n=154) |
|---------------------------|-----------------------|------------------------|-------------------------|
|                           | <i>b</i>              | <i>b</i>               | <i>b</i>                |
| <i>Height (per 10 cm)</i> |                       |                        |                         |
| SER (D)                   | -0.31 (-0.59, -0.03)* | -0.48 (-0.71, -0.24)** | 0.35 (-0.52, 1.22)      |

|                                      |                       |                        |                      |
|--------------------------------------|-----------------------|------------------------|----------------------|
| AL (mm)                              | 0.17 (-0.02, 0.35)    | 0.25 (0.11, 0.38)**    | -0.25 (-0.69, 0.18)  |
| CCT ( $\mu\text{m}$ )                | 2.01 (-5.59, 9.60)    | 0.77 (-3.82, 5.36)     | 10.49 (-5.41, 26.39) |
| ACD (mm)                             | 0.04 (-0.02, 0.10)    | 0.03 (-0.01, 0.06)     | -0.09 (-0.17, -0.01) |
| LT (mm)                              | -0.03 (-0.08, 0.02)   | -0.01 (-0.04, 0.01)    | 0.07 (-0.02, 0.15)   |
| VCD (mm)                             | 0.18 (-0.004, 0.36)   | 0.23 (0.09, 0.36)**    | -0.23 (-0.69, 0.23)  |
| CC (mm)                              | -0.01 (-0.07, 0.05)   | -0.01 (-0.05, 0.03)    | 0.01 (-0.09, 0.12)   |
| AL/CC                                | 0.03 (0.003, 0.05)*   | 0.04 (0.02, 0.05)**    | -0.04 (-0.09, 0.02)  |
| <i>Weight (per 10 kg)</i>            |                       |                        |                      |
| SER (D)                              | -0.37 (-0.67, -0.07)* | -0.48 (-0.74, -0.23)** | 0.39 (-0.23, 1.01)   |
| AL (mm)                              | 0.13 (-0.08, 0.33)    | 0.29 (0.15, 0.44)**    | -0.09 (-0.41, 0.22)  |
| CCT ( $\mu\text{m}$ )                | 1.43 (-6.93, 9.79)    | 3.00 (-1.99, 7.99)     | 10.83 (-0.38, 22.04) |
| ACD (mm)                             | -0.002 (-0.06, 0.06)  | 0.03 (-0.01, 0.07)     | -0.06 (-0.11, 0.002) |
| LT (mm)                              | 0.02 (-0.03, 0.08)    | -0.03 (-0.06, 0.001)   | 0.02 (-0.05, 0.08)   |
| VCD (mm)                             | 0.11 (-0.09, 0.31)    | 0.29 (0.14, 0.44)**    | -0.06 (-0.39, 0.28)  |
| CC (mm)                              | 0.02 (-0.05, 0.08)    | 0.003 (-0.04, 0.04)    | 0.04 (-0.04, 0.11)   |
| AL/CC                                | 0.01 (-0.01, 0.04)    | 0.04 (0.02, 0.06)**    | -0.03 (-0.07, 0.01)  |
| <i>BMI (per 10 kg/m<sup>2</sup>)</i> |                       |                        |                      |

1  
2  
3  
4  
5  
6  
7  
8  
9  
10  
11  
12  
13  
14  
15  
16  
17  
18  
19  
20  
21  
22  
23  
24  
25  
26  
27  
28  
29  
30  
31  
32  
33  
34  
35  
36  
37  
38  
39  
40  
41  
42  
43  
44  
45  
46

|          |                      |                     |                      |
|----------|----------------------|---------------------|----------------------|
| SER (D)  | -0.46 (-1.10, 0.17)  | -0.63 (-1.38, 0.13) | 0.96 (-1.02, 2.93)   |
| AL (mm)  | 0.06 (-0.36, 0.48)   | 0.47 (0.05, 0.90)*  | 0.03 (-0.98, 1.03)   |
| CCT (µm) | 0.84 (-16.31, 17.99) | 9.14 (-5.10, 23.37) | 28.47 (-7.47, 64.41) |
| ACD (mm) | -0.07 (-0.19, 0.06)  | 0.04 (-0.07, 0.15)  | -0.10 (-0.28, 0.09)  |
| LT (mm)  | 0.10 (-0.01, 0.21)   | -0.07 (-0.16, 0.01) | -0.03 (-0.23, 0.17)  |
| VCD (mm) | 0.01 (-0.40, 0.43)   | 0.51 (0.08, 0.93)*  | 0.15 (-0.91, 1.21)   |
| CC (mm)  | 0.05 (-0.09, 0.19)   | 0.03 (-0.08, 0.14)  | 0.13 (-0.11, 0.37)   |
| AL/CC    | -0.01 (-0.06, 0.04)  | 0.05 (-0.003, 0.11) | -0.05 (-0.17, 0.08)  |

\* $P < 0.05$ ; \*\* $P < 0.01$ .

Each value represents a separate regression model with height, weight, or BMI used as the independent variable and the refraction or individual ocular biometrics used as the dependent variable. We controlled for gender, parental myopia, family income, reading and writing distance, and time spent outdoors. Data in parentheses represents the 95% confidence interval.

1  
2  
3  
4  
5  
6  
7  
8  
9  
10  
11  
12  
13  
14  
15  
16  
17  
18  
19  
20  
21  
22  
23  
24  
25  
26  
27  
28  
29  
30  
31  
32  
33  
34  
35  
36  
37  
38  
39  
40  
41  
42  
43  
44  
45  
46  
47  
48  
49  
50  
51  
52  
53  
54  
55  
56  
57  
58  
59  
60

For peer review only

**Supplementary Table 1** Specific classification of some items in the questionnaire.

|                                                                                    |                                                                                                                    |
|------------------------------------------------------------------------------------|--------------------------------------------------------------------------------------------------------------------|
| What day is your child's birthday?                                                 | _____ (yy/mm/dd)                                                                                                   |
| What's your child's gender?                                                        | A. Male    B. Female                                                                                               |
| What is the average monthly income of your family?                                 | A. Less than 4000 RMB<br>B. 4000-8000 RMB<br>C. 8000-10,000 RMB<br>D. 10,000-15,000 RMB<br>E. More than 15,000 RMB |
| Does the child's mother wear glasses for myopia?                                   | A. Yes    B. No                                                                                                    |
| Does the child's father wear glasses for myopia?                                   | A. Yes    B. No                                                                                                    |
| What is the distance between your child's eyes and a book when reading or writing? | A. <10 cm    B. 10-19 cm<br>C. 20-29 cm    D. ≥30 cm                                                               |
| How many hours per day dose the child spend on outdoor activities during weekdays? | _____ hours _____ minutes                                                                                          |
| How many hours per day dose the child spend on outdoor activities during weekends? | _____ hours _____ minutes                                                                                          |

**STROBE 2007 (v4) Statement—Checklist of items that should be included in reports of *cross-sectional studies***

| Section/Topic                | Item # | Recommendation                                                                                                                                                                       | Reported on page # |
|------------------------------|--------|--------------------------------------------------------------------------------------------------------------------------------------------------------------------------------------|--------------------|
| <b>Title and abstract</b>    | 1      | (a) Indicate the study's design with a commonly used term in the title or the abstract                                                                                               | Page 2             |
|                              |        | (b) Provide in the abstract an informative and balanced summary of what was done and what was found                                                                                  | Page 2-3           |
| <b>Introduction</b>          |        |                                                                                                                                                                                      |                    |
| Background/rationale         | 2      | Explain the scientific background and rationale for the investigation being reported                                                                                                 | Page 4-5           |
| Objectives                   | 3      | State specific objectives, including any prespecified hypotheses                                                                                                                     | Page 5             |
| <b>Methods</b>               |        |                                                                                                                                                                                      |                    |
| Study design                 | 4      | Present key elements of study design early in the paper                                                                                                                              | Page 6             |
| Setting                      | 5      | Describe the setting, locations, and relevant dates, including periods of recruitment, exposure, follow-up, and data collection                                                      | Page 6             |
| Participants                 | 6      | (a) Give the eligibility criteria, and the sources and methods of selection of participants                                                                                          | Page 6             |
| Variables                    | 7      | Clearly define all outcomes, exposures, predictors, potential confounders, and effect modifiers. Give diagnostic criteria, if applicable                                             | Page 7-8           |
| Data sources/<br>measurement | 8*     | For each variable of interest, give sources of data and details of methods of assessment (measurement). Describe comparability of assessment methods if there is more than one group | Page 7-8           |
| Bias                         | 9      | Describe any efforts to address potential sources of bias                                                                                                                            | Page 6-9           |
| Study size                   | 10     | Explain how the study size was arrived at                                                                                                                                            | Page 10            |
| Quantitative variables       | 11     | Explain how quantitative variables were handled in the analyses. If applicable, describe which groupings were chosen and why                                                         | Page 8-9           |
| Statistical methods          | 12     | (a) Describe all statistical methods, including those used to control for confounding                                                                                                | Page 8-9           |
|                              |        | (b) Describe any methods used to examine subgroups and interactions                                                                                                                  | --                 |
|                              |        | (c) Explain how missing data were addressed                                                                                                                                          | --                 |
|                              |        | (d) If applicable, describe analytical methods taking account of sampling strategy                                                                                                   | --                 |
|                              |        | (e) Describe any sensitivity analyses                                                                                                                                                | --                 |
| <b>Results</b>               |        |                                                                                                                                                                                      |                    |

|                          |     |                                                                                                                                                                                                              |            |
|--------------------------|-----|--------------------------------------------------------------------------------------------------------------------------------------------------------------------------------------------------------------|------------|
| Participants             | 13* | (a) Report numbers of individuals at each stage of study—eg numbers potentially eligible, examined for eligibility, confirmed eligible, included in the study, completing follow-up, and analysed            | Page 10    |
|                          |     | (b) Give reasons for non-participation at each stage                                                                                                                                                         | Page 10    |
|                          |     | (c) Consider use of a flow diagram                                                                                                                                                                           | --         |
| Descriptive data         | 14* | (a) Give characteristics of study participants (eg demographic, clinical, social) and information on exposures and potential confounders                                                                     | Page 10    |
|                          |     | (b) Indicate number of participants with missing data for each variable of interest                                                                                                                          | Page 10    |
| Outcome data             | 15* | Report numbers of outcome events or summary measures                                                                                                                                                         | Page 10    |
| Main results             | 16  | (a) Give unadjusted estimates and, if applicable, confounder-adjusted estimates and their precision (eg, 95% confidence interval). Make clear which confounders were adjusted for and why they were included | Page 10-12 |
|                          |     | (b) Report category boundaries when continuous variables were categorized                                                                                                                                    | Page 9     |
|                          |     | (c) If relevant, consider translating estimates of relative risk into absolute risk for a meaningful time period                                                                                             | --         |
| Other analyses           | 17  | Report other analyses done—eg analyses of subgroups and interactions, and sensitivity analyses                                                                                                               | --         |
| <b>Discussion</b>        |     |                                                                                                                                                                                                              |            |
| Key results              | 18  | Summarise key results with reference to study objectives                                                                                                                                                     | Page 12    |
| Limitations              | 19  | Discuss limitations of the study, taking into account sources of potential bias or imprecision. Discuss both direction and magnitude of any potential bias                                                   | Page 15    |
| Interpretation           | 20  | Give a cautious overall interpretation of results considering objectives, limitations, multiplicity of analyses, results from similar studies, and other relevant evidence                                   | Page 13-15 |
| Generalisability         | 21  | Discuss the generalisability (external validity) of the study results                                                                                                                                        | Page 15    |
| <b>Other information</b> |     |                                                                                                                                                                                                              |            |
| Funding                  | 22  | Give the source of funding and the role of the funders for the present study and, if applicable, for the original study on which the present article is based                                                | Page 16    |

\*Give information separately for cases and controls in case-control studies and, if applicable, for exposed and unexposed groups in cohort and cross-sectional studies.

**Note:** An Explanation and Elaboration article discusses each checklist item and gives methodological background and published examples of transparent reporting. The STROBE checklist is best used in conjunction with this article (freely available on the Web sites of PLoS Medicine at <http://www.plosmedicine.org/>, Annals of Internal Medicine at <http://www.annals.org/>, and Epidemiology at <http://www.epidem.com/>). Information on the STROBE Initiative is available at [www.strobe-statement.org](http://www.strobe-statement.org).
