# Supplementary material for: Associations between anthropometric indicators and both refraction and ocular biometrics in a cross-sectional study of Chinese schoolchildren
Source: PubMed Central journal article supplement — BMJ Open. 2019 May 10;9(5):e027212. doi: 10.1136/bmjopen-2018-027212 (PMC6530363; doi:10.1136/bmjopen-2018-027212), 2019-05-10
Supplement: bmjopen-2018-027212supp001.pdf [file bmjopen-2018-027212supp001.pdf]

**Supplementary Table 1** Specific classification of some items in the questionnaire.

|                                                                                    |                                                                                                                    |
|------------------------------------------------------------------------------------|--------------------------------------------------------------------------------------------------------------------|
| What day is your child's birthday?                                                 | _____ (yy/mm/dd)                                                                                                   |
| What's your child's gender?                                                        | A. Male    B. Female                                                                                               |
| What is the average monthly income of your family?                                 | A. Less than 4000 RMB<br>B. 4000-8000 RMB<br>C. 8000-10,000 RMB<br>D. 10,000-15,000 RMB<br>E. More than 15,000 RMB |
| Does the child's mother wear glasses for myopia?                                   | A. Yes    B. No                                                                                                    |
| Does the child's father wear glasses for myopia?                                   | A. Yes    B. No                                                                                                    |
| What is the distance between your child's eyes and a book when reading or writing? | A. <10 cm    B. 10-19 cm<br>C. 20-29 cm    D. ≥30 cm                                                               |
| How many hours per day dose the child spend on outdoor activities during weekdays? | _____hours_____minutes                                                                                             |
| How many hours per day dose the child spend on outdoor activities during weekends? | _____hours_____minutes                                                                                             |
